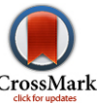

# The Reduced Effectiveness of Protected Areas under Climate Change Threatens Atlantic Forest Tiger Moths

Viviane G. Ferro<sup>1</sup>, Priscila Lemes<sup>2</sup>, Adriano S. Melo<sup>1</sup>, Rafael Loyola<sup>1\*</sup>

**1** Departamento de Ecologia, Universidade Federal de Goiás, Goiânia, Goiás, Brazil, **2** Programa de Pós-Graduação em Ecologia e Evolução, Universidade Federal de Goiás, Goiânia, Goiás, Brazil

## Abstract

Climate change leads to species' range shifts, which may end up reducing the effectiveness of protected areas. These deleterious changes in biodiversity may become amplified if they include functionally important species, such as herbivores or pollinators. We evaluated how effective protected areas in the Brazilian Atlantic Forest are in maintaining the diversity of tiger moths (Arctiinae) under climate change. Specifically, we assessed whether protected areas will gain or lose species under climate change and mapped their locations in the Atlantic Forest, in order to assess potential spatial patterns of protected areas that will gain or lose species richness. Comparisons were completed using modeled species occurrence data based on the current and projected climate in 2080. We also built a null model for random allocation of protected areas to identify where reductions in species richness will be more severe than expected. We employed several modern techniques for modeling species' distributions and summarized results using ensembles of models. Our models indicate areas of high species richness in the central and southern regions of the Atlantic Forest both for now and the future. However, we estimate that in 2080 these regions should become climatically unsuitable, decreasing the species' distribution area. Around 4% of species were predicted to become extinct, some of them being endemic to the biome. Estimates of species turnover from current to future climate tended to be high, but these findings are dependent on modeling methods. Our most important results show that only a few protected areas in the southern region of the biome would gain species. Protected areas in semideciduous forests in the western region of the biome would lose more species than expected by the null model employed. Hence, current protected areas are worse off, than just randomly selected areas, at protecting species in the future.

**Citation:** Ferro VG, Lemes P, Melo AS, Loyola R (2014) The Reduced Effectiveness of Protected Areas under Climate Change Threatens Atlantic Forest Tiger Moths. *PLoS ONE* 9(9): e107792. doi:10.1371/journal.pone.0107792

**Editor:** Brock Fenton, University of Western Ontario, Canada

**Received:** March 7, 2013; **Accepted:** August 22, 2014; **Published:** September 17, 2014

**Copyright:** © 2014 Ferro et al. This is an open-access article distributed under the terms of the Creative Commons Attribution License, which permits unrestricted use, distribution, and reproduction in any medium, provided the original author and source are credited.

**Funding:** VGF work is funded by CNPq (grant #563332/2010-7). PL received a PhD studentship from CNPq. RDL and ASM received productivity fellowships granted by CNPq (grants #304703/2011-7 and #307479/2011-0, respectively). RDL work is funded by CAPES-FCT Program, by the Brazilian Research Network on Global Climate Change (Rede CLIMA), and Conservation International Brazil. This study benefited from resources provided by Site 13 (Parque Nacional das Emas) of the Brazilian Long Term Ecological Research Network (CNPq, grant #558187/2009-9). The funders had no role in study design, data collection and analysis, decision to publish, or preparation of the manuscript.

**Competing Interests:** The authors have declared that no competing interests exist.

\* Email: rdiasloyola@gmail.com

## Introduction

The implementation and maintenance of protected areas is still the cornerstone of conservation actions [1]. However, due to broad-scale environmental changes which will potentially shift the distribution of suitable habitats for many species across the geographic space [2,3], scientists have expressed concern that existing networks of protected areas might not be able to guarantee the long-term persistence of the species they are supposed to protect [4,5].

Climate change poses a new challenge to the traditionally static way conservation planning is usually done, by forcing planning to become more dynamic [6]. Several species have already shifted their ranges to cooler regions, both in temperate regions and in the tropics, as a response to a warming climate [7–9]. Most solutions offered by conservation scientists and practitioners to deal with species' range shifts focus on the establishment of new protected areas that should cope with the effects of climate change on species distribution [6,10–16]. However, the effectiveness of protected areas may decrease as they become climatically unsuitable for most species [5] and more suitable to invasive species [17,18].

Climate-driven modifications in species composition within protected areas may disrupt species interactions [19] by altering ecosystem functioning [20]. Therefore, it is necessary to take into account forecasted changes in species distributions to evaluate the future effectiveness of protected areas [5,6,21].

The effects of climate change on species distributions have been generally inferred through ecological niche models (ENM) [22], also referred to as “bioclimatic envelope models” (BEM) [23] or “species distribution models” (SDM) [24]. Araújo and Peterson [25], Peterson and Soberón [26], and Rangel and Loyola [27] have all provided recent clarifications on their conceptual differences. However, different modeling methods and climate models may produce very different outputs, increasing uncertainties in projected distributions and their applicability to conservation efforts [3,28]. In the last decade, new modeling techniques have been developed that take into consideration such impediments (e.g. model ensemble forecasting). Nonetheless, few studies have applied modern techniques to predict the distribution of invertebrates (but see Diniz-Filho et al., 2010a, b), despite an

urgent need to evaluate the consequences of climate change to this hyperdiverse group in order to plan for its conservation [29].

Lepidoptera is the second richest order of insects, with 150,000 species recorded in the world [30]. Butterflies and moths are exclusive pollinators of many plant species [31,32]. The vast majority of Lepidoptera larvae are herbivores, consuming almost all orders of gymnosperms and angiosperms as well as mosses and ferns [33]. Herbivory can influence the fitness [34], distribution, composition and abundance of plant species [35], as well as the rate of litter decomposition [36]. Lepidopterans are also important food items for arthropods (in particular spiders and other insects) and vertebrates (especially birds and bats). Changes in Lepidoptera diversity, abundance, phenology, distribution and assemblage composition driven by climate changes may affect ecosystem functions and services, species interactions, as well as the structure of plant communities and economic losses due to insect infestation and pestilence [37].

Many studies have found that climate change will alter patterns of phenology, horizontal or vertical range (distribution and area), and the abundance of Lepidoptera species (reviewed in [38]). For example, Conrad et al. [39] studied the population dynamics of the tiger moth *Arctia caja* (Arctiinae) between 1968 and 1999 in Great Britain and observed a decrease of about 30% of abundance and proportion of occupied sites after 1984. Arctiinae (Erebidae) (classification following [40]), in particular, comprises almost 11,000 species of moths, of which about 6,000 are found in the Neotropics [41]. In Brazil, there are records for 1,391 species [42]. The Atlantic Forest has the richest Arctiinae fauna among all Brazilian biomes (1193 species) and approximately 40% of these species are endemic to this biome [43]. Arctiinae larvae feed on angiosperms and gymnosperms, as well as algae, lichens, and mosses [44]. Although Arctiinae are among the most polyphagous lepidopterans [44], the proportion of generalist species decreases toward the tropics. Many Arctiinae larvae and adults have conspicuous coloration, are diurnal and many adults form mimetic rings with Hemiptera, Hymenoptera, Coleoptera and unpalatable butterflies [45]. As well as exhibiting warning coloration, most of these moths are also toxic or unpalatable. Several secondary compounds were found in all stages of Arctiinae (eggs, larvae, pupae and adults), including pyrrolizidine alkaloids, which are generally sequestered from their host plants during the larval stage [45]. We choose this group because of its important roles in ecosystems and also because of their extremely high diversity in the region, so that we can run models using a great amount of data and keeping the taxonomic group narrow.

Here, we evaluated the current and future climatic suitability of protected areas located in the Atlantic Forest Biodiversity Hotspot (in Brazil) based on species' ecological niche models and diversity patterns of tiger moths (Lepidoptera: Erebidae: Arctiinae). More specifically, we addressed the following questions: (1) how will climate change affect the geographical pattern of Arctiinae species richness in the region? And (2) how does the spatial location of a given protected area determine if it will gain or lose species under different climate change scenarios?

We selected tiger moths as our case-study because they comprise a species-rich subfamily, are well represented in Brazilian collections (especially in the Atlantic Forest, which is the geographical area covered in this study) [42] and because there are several active researchers currently working with Neotropical Arctiinae. These researchers helped with the identification of some species and allowed for a nomenclatural update, incorporating recent occurrence records in our dataset.

## Methods

### Study region

We focused our analyses on the Atlantic Forest Biodiversity Hotspot [46]. The Atlantic Forest originally covered around 150 million ha (Fig. 1) with heterogeneous environmental conditions. Its latitudinal range extends into tropical and subtropical regions, and its wide longitudinal range harbors differences in forest composition due to a diminishing gradient in rainfall from coast to interior [47]. Although the Atlantic Forest has high diversity and endemism (with more than 20,000 plant species, 261 mammal species, 688 bird species, 200 reptile species, 280 amphibian species, to name well-studied taxonomic groups), currently, only ca. 1% of the original forests are legally protected [47]. An effective reserve network, taking into account climate change to ensure the species persistence in the long-term, is therefore imperative to address conservation investment in appropriate sites.

### Ecological niche models

We obtained occurrence records for 703 tiger moth species inhabiting the Atlantic Forest from field surveys and museum records. Tiger moth records included the period of 1920 to 2008. We overlaid these point-locality records for each species into an equal-area grid (10 km × 10 km of spatial resolution) that covered the full extent of the Atlantic Forest. Then, we built a species by grid cell matrix, considering presences of species inside grid cells. Species with less than five occurrences were excluded to avoid model bias, and therefore, a total of 507 species were studied.

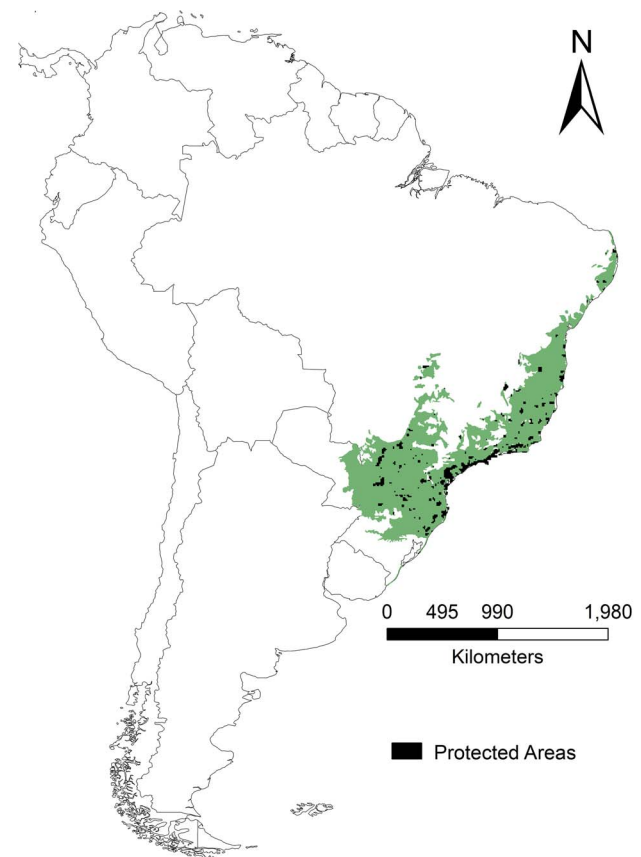

**Figure 1. Original extent of the Atlantic Forest Biodiversity Hotspot in Brazil.**

doi:10.1371/journal.pone.0107792.g001

We obtained current climatic data from the WorldClim database (<http://www.worldclim.org/current>) and future climatic scenarios from CIAT (<http://ccafs-climate.org>). These future scenarios were developed by the Intergovernmental Panel on Climate Change (IPCC) Fourth Assessment Report (AR4). For each species, we modeled its distribution as a function of four climatic variables: annual mean temperature, temperature seasonality (standard deviation \* 100), annual precipitation and precipitation seasonality (coefficient of variation). These variables represent interpolated climate data from 1950 to 2000 [48]. For future climatic conditions we used the same climate variables for the year 2080, obtained from three Atmosphere-Ocean General Circulation Models (AOGCMs) of the A2 emission scenario (CCCMA-CGCM2, CSIRO-MK2.0 and UKMO-HadCM3), that were generated by application of delta downscaling method on the original data from IPCC's report. Data original resolution was 30 arc-seconds and both current and future climate variables were re-scaled to our grid resolution.

We used presence derived from species' occurrences and climatic variables to model species' ecological niche and project their distributions. As reliable absence data were not available, we fitted six presence-only modeling methods (which differ both conceptually and statistically [27]), grouped them into two separate sets (distance methods and machine-learning methods) and applied the ensemble forecasting approach within each set (see text below). Distance methods were Euclidian and Gower distances [49] and Ecological Niche Factor Analysis (ENFA) [50]. Machine learning methods were Maximum Entropy (MaxEnt) [51], Genetic Algorithm for Rule Set Production (GARP) [52] and Artificial Neural Networks (ANN) [53]. These presence-only methods for modeling species' ecological niches can be grouped into three types of presence-only methods [54]. Firstly, into methods based solely on presence records (e.g. Euclidian and Gower distances), the prediction is made without reference to other samples from the study area. Secondly, into methods using "background" climatic data for the whole study area (e.g. ENFA, MaxEnt), which evaluate how the climatic conditions where species are known to occur relates to the climate across the rest of the study area (the 'background'). Thirdly, into methods that generate (sample) "pseudo-absences" from the study area (e.g. GARP, ANN), assessing differences between occurrence sites and a set of sites chosen from the study area which are used instead of real absence data. In this case, the set of "pseudo-absences" were selected randomly [52].

For all models, we randomly partitioned presence and pseudo-absence data of each species in 75% for calibration (or training) and 25% for validation (or test); repeating this process 10 times (i.e. a cross-validation) and maintaining the observed prevalence of each species. We converted continuous predictions in presence and pseudo-absences finding the threshold with maximum sensitivity and specificity values in the receiver operating characteristic (ROC) curve and calculated the True Skill Statistics (TSS) to evaluate model performance [55]. The ROC Curve is created by plotting the fraction of true positives out of the positives vs. the fraction of false positives out of the negatives, at various threshold settings. The TSS range from -1 to +1, where values equal +1 is a perfect prediction and values equal to or less than zero is a prediction no better than random [55]. Although the area under the receiver operating characteristic curve (AUC) is the most common method to evaluate the accuracy of predictive distribution models, we decided to use TSS. There are several reasons why AUC should not be used for this purpose [56]. In particular, AUC weighs omission and commission errors equally

and the total geographic extent of the study highly influences its scores [56].

We did an ensemble of forecasts to produce consensual predictions of species distributions [3,10,23,28,57–59]. We projected distributions to current climatic conditions and obtained 30 projections per species within each set of methods (3 modeling methods ×10 randomly partitioned data). We also projected distributions to future climate, obtaining 90 projections per species (3 modeling methods ×3 climate models ×10 randomly partitioned data). This allowed us to generate a frequency of projections in the ensemble. We then generated the frequency of projections weighted by the TSS statistics for each species and timeframe within each set of methods, i.e. best models have more weight in our consensus projections. We considered the presence of a species only in cells with 50% or more of frequency of projections, but a continuous value was held when this occurred. Then, we defined species richness as the sum of the ranges which overlapped (predicted by ENMs) for each cell. So, for example, if twenty different species were projected in a given cell the species richness for that cell was considered as twenty. Finally, we calculated species turnover between contemporary and future species distributions in each cell  $(G+L/S)/S+G$ , where "G" was the number of species gained, "L" the number of species lost and "S" is the contemporary species richness found in the cell.

### Evaluation of protected area effectiveness under climate change

The locations of the 187 protected areas (IUCN Categories I–IV) currently established in the Atlantic Forest were obtained from the United Nations Environmental Programme, World Conservation Monitoring Centre (UNEP-WCMC) [60]. These protected areas comprised 820 cells distributed in 11,461 Atlantic Forest cells. We overlaid protected area polygons onto our grid considering a grid cell as "protected" even if only a portion of it is protected, assuming that all species occurring in that cell could potentially benefit from the occurrence of a protected area in that cell.

Our aim was to evaluate whether current locations of protected areas are better than random allocations in protecting tiger moth diversity in the face of climate change. For this, we generated a null model that maintained size, form and orientation of protected areas but removed other intrinsic effects that likely will affect their suitability in the face of climate change (i.e. latitude, altitude). The null model allocated the protected areas randomly in the Atlantic Forest and obtained species richness in the present and the future based on the projections of species distribution models. Since there are many distinct possibilities to randomly allocate protected areas in the Atlantic Forest, this procedure was repeated 1,000 times and the average species richness obtained.

### Results

For most species, TSS values were relatively high (mean TSS ± SD =  $0.55 \pm 0.05$  for distance methods; and  $0.64 \pm 0.14$ , for machine-learning methods) indicating good model fit (Table S1). Different modeling methods projected similar patterns of tiger moth species richness both for current and future climates, except for ENFA and ANN (Fig. 2). For all modeling methods, ensemble projections indicated areas of high species richness in the central and southern regions of the Atlantic Forest both for now and for 2080 (Fig. 3). However, these regions should become climatically unsuitable in 2080 for many species, decreasing species' distribution areas (Fig. 3, Table S2 and S3). We also found high species temporal turnover (up to 100% for all methods) across the

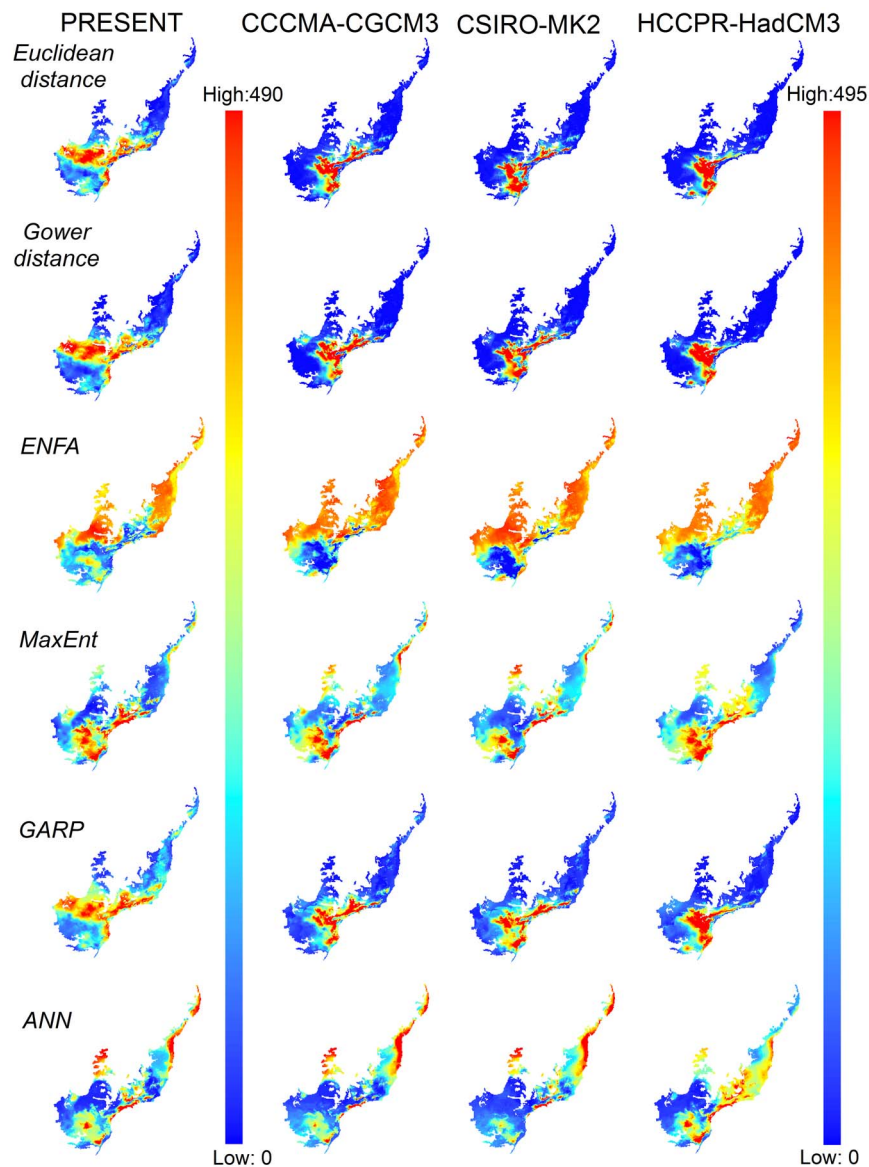

**Figure 2. Species richness patterns for tiger moths in the Atlantic Forest Biodiversity Hotspot, Brazil.** Tiger moth species richness patterns in the Atlantic Forest, Brazil (present and future, 2080, climate models CCCMA-CGCM3, CSIRO-MK2, and HCCPR-HadCM3) forecasted by ecological niche models generated by different distance modeling methods (Euclidean and Gower distances, Ecological Niche Factor Analysis, ENFA) and machine learning methods (Maximum Entropy, MaxEnt; Genetic algorithm for Rule set Production, GARP; Artificial Neural Networks, ANN). doi:10.1371/journal.pone.0107792.g002

projections between current and future climates (Fig. 4). This means that future scenarios showed dramatic changes not only in species richness but also in turnover of species composition (Table S4).

Central and northern sections of the Atlantic Forest should face higher temperatures, with lower seasonality, whereas the south should receive more rainfall, yet also have lower seasonality (Fig. 5). Most species had a significant range contraction (Table S3). Consensus of machine-learning methods projected up to 4.3% of species that had their ranges reduced by 100%, whereas consensus of distance methods projected 0.4% of species in the same situation (Table S3).

Future species richness should be lower than contemporary richness for most of the protected areas (Fig. 6). Differences between future and contemporary species richness were more varied for Distance than Machine Learning methods (Fig. 6A1

and 6B1). Distance models show a more optimistic result, with some protected areas holding more species (green dots in Fig. 6A1 and protected areas in the Fig. 6A2) in the future than in current time. These protected areas predicted to gain species richness are mostly located in the mountainous southeastern portion of the biome.

Machine-learning methods predicted that almost all protected areas will lose species in the future (Figs. 6B1 and 6B2). The main expectation of the null model of random location of protected areas is the loss of species in the future, both for Distance (Fig. 6A1) and Machine Learning (Fig. 6B1) methods. Among the protected areas predicted to lose species (orange and red dots and protected areas in Fig. 6), around half of them should experience losses worse than those predicted by the null model (red dots and protected areas in Fig. 6). These protected areas are concentrated in the southwestern and northern sections of the biome.

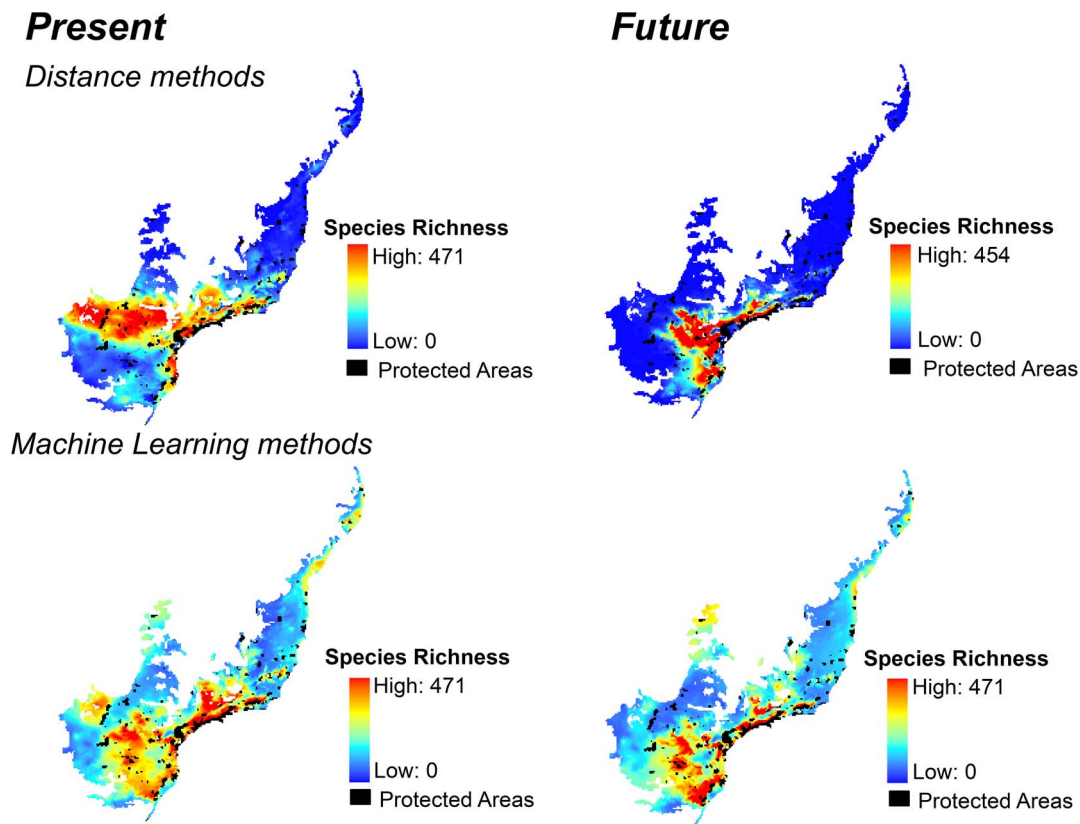

**Figure 3. Consensus maps for tiger moth species richness in the Atlantic Forest Biodiversity Hotspot, Brazil.** Maps of modeled tiger moth species richness based on consensus projections of 507 species predicted to occur in the Atlantic Forest Biodiversity Hotspot, Brazil, for current time (1950–2000) and 2080 (2051–2080) according to two different types of modeling methods and climate models. Models from distance and machine-learning methods were combined through an ensemble of forecasts to generate these consensus maps. doi:10.1371/journal.pone.0107792.g003

In addition to the general trend of species loss, the baseline comparison provided by the null model of random allocation of protected areas (blue dots) indicated great variation between how many species protected areas would lose (and also gain in case of distance methods). For machine-learning methods, species richness for current and future climates for the real locations of protected areas was generally lower (red dots and protected areas in Fig. 6) than those obtained from the random locations of protected areas (blue dots in Fig. 6). Nearly half of currently established protected areas should become climatically unsuitable at rates higher than expected by a random distribution of protected areas (red dots and protected areas in Fig. 6).

Protected areas predicted to gain species (particularly for distance methods) are mostly located in the cooler southern region of the Atlantic Forest (Fig. 6). Protected areas along the coast or in adjacent mountainous areas should lose species, although those in the north would do so at rates higher than those expected by our null model (protected areas indicated in red). The western region of the biome, which includes semideciduous forests, will experience a severe reduction in species richness due to climate change (Fig. 6).

## Discussion

We forecasted species' range shifts and range contractions for most tiger moth species inhabiting the Atlantic Forest to evaluate the effectiveness of existing protected areas [61,62]. Our findings indicate that most protected areas should become climatically

unsuitable for sustaining their current number of species under climate change. As Atlantic Forest protected areas will become less effective in safeguarding moths, it is important to anticipate how climatic changes will lead to a decreasing species representation across the entire network of protected areas.

Our results agree with Pearson and colleagues [63] which detected similar accuracy among species distribution models, although the spatial pattern in the predictions was different. Distance methods are simple methods that do not consider complex relationships between species occurrence and predictors, use presence-only data and tend to underestimate the distribution in novel conditions like those expected to occur under climate change [24,63]. Alternatively, machine-learning methods are very complex, assume different relationships and can underestimate or overestimate distributions in novel conditions [24,63]. These features help explain the differences in our results obtained by distance methods when compared with machine-learning methods, especially regarding the pattern of species richness and turnover rates.

The choice of a perfect set of modeling methods, however, is not an easy task. When predicting climate change effects on species distributions, commission errors lead to the overestimation of range expansions whereas omission errors produce overestimates of range contractions. If one is employing such models to predict regions of climatic stability to guide conservation actions, both omission and commission errors are of particular interest, as these errors are likely to produce huge bias in the results of gap-analysis as well. Distance models tend to inflate commission errors and

## Distance methods

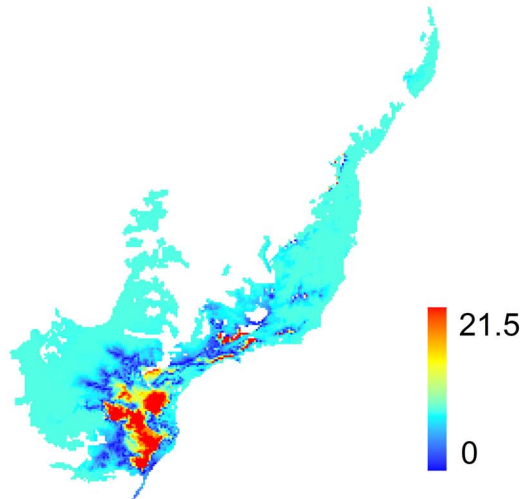

## Machine Learning methods

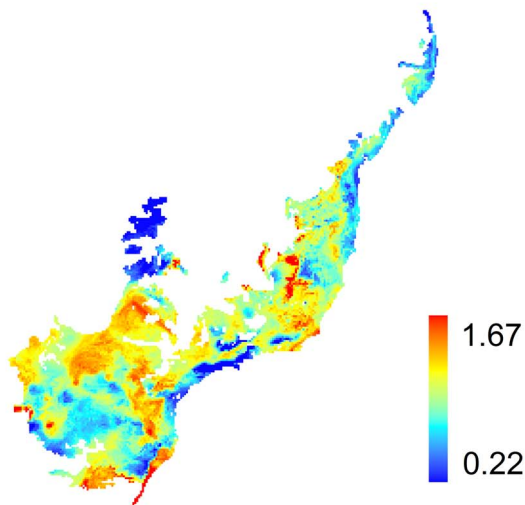

**Figure 4. Species turnover pattern for tiger moths in the Atlantic Forest Biodiversity Hotspot, Brazil.** Maps of modeled tiger moth species turnover based on consensus projections of 507 species predicted to occur in the Atlantic Forest Biodiversity Hotspot, Brazil, for current time (1950–2000) and 2080 (2051–2080) according to two different types of modeling methods and climate models. Models from distance and machine-learning methods were combined through an ensemble of forecasts to generate these consensus maps. doi:10.1371/journal.pone.0107792.g004

individual species distribution, which are usually larger than predicted by other models. Machine-learning models usually result in smaller distributions when compared to other models. Thus, if conservation practitioners want to reduce commission errors, machine-learning models are perhaps the best option. Although, in this case, one will probably face the inconvenience of a lack of clarity and in turn, a difficulty of explaining results to stakeholders and decision makers involved in the conservation process [27].

Our study predicts that up to 4.3% of tiger moth species should face 100% of range contraction in the Atlantic Forest's future. Among these species that would disappear from the region, three of them are endemic (*Clemensia marmorata*, *Cosmosoma cingla*,

and Arctiini NI92 morphospecies). The majority ( $n = 18$ ) of species predicted to have a 100% of range contraction belong to the Arctiini tribe (in general robust, medium-sized moths and polyphagous larvae) and the Lithosiini tribe (in general slender, small-sized moths, and lichen-feeding larvae). Unfortunately, there is little, scattered information on the natural history of and the appropriate climatic conditions for these species available (as for the vast majority of Neotropical species). It is therefore hard to make recommendations for conservation strategies for these species.

In general, the consequences of these extinctions can spread through networks of interaction causing extinction cascades and consequent disrupted ecological functions in ecosystems [19,64]. In addition to causing local and regional extinctions, climate change can alter the size and location of the range and patterns of abundance and phenology of species [38]. Many lepidopterans, including Arctiinae species [65], are agricultural pests and changes in range, abundance and phenology of these species may increase the rate of invasion and increase the damage intensity they can cause [66,67]. Furthermore, climate change can modify patterns of synchronization between larvae and host plants, among adults and flowers, and among the two life stages and their natural enemies [68]. Some tiger moth species are important pollinators of Atlantic Forest plants, including orchids [69], and the lack of synchronization between flowering and pollinating may cause more extinctions.

We also found an increase in species richness in the future in a few southern areas of the biome, due to the expansion of the range toward higher latitudes. This pattern has been observed in studies on Lepidoptera [9,70] and other groups [8]. It is known, however, that species with wide latitudinal ranges could be preadapted to cope with climate change because they already find considerable temperature variation across their habitats. However, low dispersal capability and difficulties to cross open habitats may prevent or at least slow down range shifts of Arctiinae [38]. For instance, several studies have found that Arctiinae species disperse over short distances in natural conditions [71,72]. The average distance traveled by *Dysauxes ancilla* L. moths in two consecutive days (at mark-released-recapture study), for example, was only 43 m [72]. The same author observed that moths rarely leave their breeding area and did not cross very open areas or dense forest. In fact, two other studies in Brazilian Biodiversity Hotspots, the Atlantic Forest [73] and the Cerrado [74] found that Arctiinae fauna of open vegetation (grassland) differed from the denser vegetation (forest) and a very small number of species co-occurred in these vegetation types. More importantly, these differences were evident even when the sample sites were close to each other (about 100 m). Accordingly, the low dispersal capability of the species of Arctiinae compounded with the low ability of the species to cross open areas in fragmented landscapes of the Atlantic Forest should further complicate the future of these species. This is particularly concerning in the Atlantic Forest, given that human activity has degraded more than 85% of the biome [47].

One strategy to mitigate the loss of species in the Atlantic Forest protected areas in the future would be the creation of protected areas in southern regions and at higher altitudes of the Atlantic Forest. Klorvuttimontara and colleagues [75], for example, despite having recorded a reduction of approximately 30% of butterfly richness in the protected areas of Thailand in the future (A2 scenario), observed that the effectiveness of protected areas remained almost the same in the future. The explanation for this was that most protected areas in Thailand are located at high altitudes, allowing the butterflies to migrate from lowland areas to higher altitudes as the climate becomes unsuitable in the future. Of course, critical questions should be addressed to actually imple-

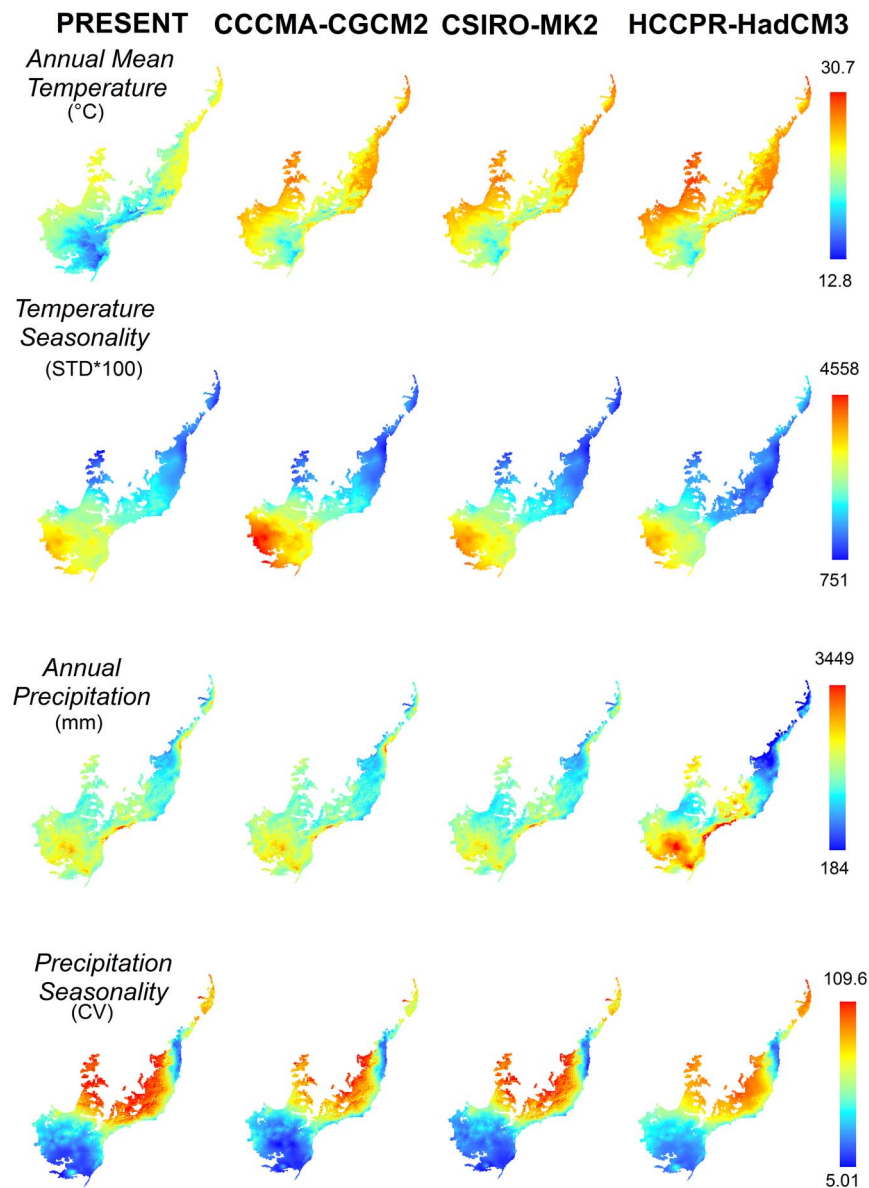

**Figure 5. Expected changes for the four climatic variables used to model species' ecological niches in the Atlantic Forest Biodiversity Hotspot, Brazil.** Maps show present conditions and values for future climate models CCCMA-CGCM3, CSIRO-MK2, and HCCPR-HadCM3, in 2080.

doi:10.1371/journal.pone.0107792.g005

ment a decision like this, such as infostering the implementation of protected areas in high-altitude regions. Some questions would be, for example: what are the indications that these regions would protect other taxa than moths? Weel, it seems defensible to predict that they likely will be, because many species and communities are likely to migrate south and to higher elevations in response to climate change [7,8,10,17]. Should protected areas be placed to span altitudinal ranges within the protected area itself, so that species can start low and move steadily higher as the climate changes? These questions are still difficult to answer, but we hope our study is a step towards scientifically driven decisions in future protected area establishment and management.

The establishment of protected areas is still one of our best conservation actions to protect biodiversity. The Atlantic Forest has been indicated as a conservation priority by several world studies using different criteria [76,77]. Our approach is one of the

first to incorporate climate change threats on the long-term assessment of protected areas (see [5,17,21,77,78]). In fact, climatic changes are increasingly driving species out of protected areas due to species range shifts [5,79,80].

It is important to highlight some of the caveats of our study. Firstly, our database has a large number of records, which were gathered from field studies and museum records. Although the data is dense and trustworthy, there could be some bias towards easily assessed sampling regions or toward large, colorful species, as in all kinds of samplings. Further, some records were from as early as 1920 and climate has likely shifted already since then. Secondly, our models assume tiger moths are in equilibrium with the current climate and have unlimited dispersal to tackle suitable climates as they move in the geographic space. These are simple assumptions allowing us to model all species distribution at a time. Thirdly, we predicted future species distribution assuming that the

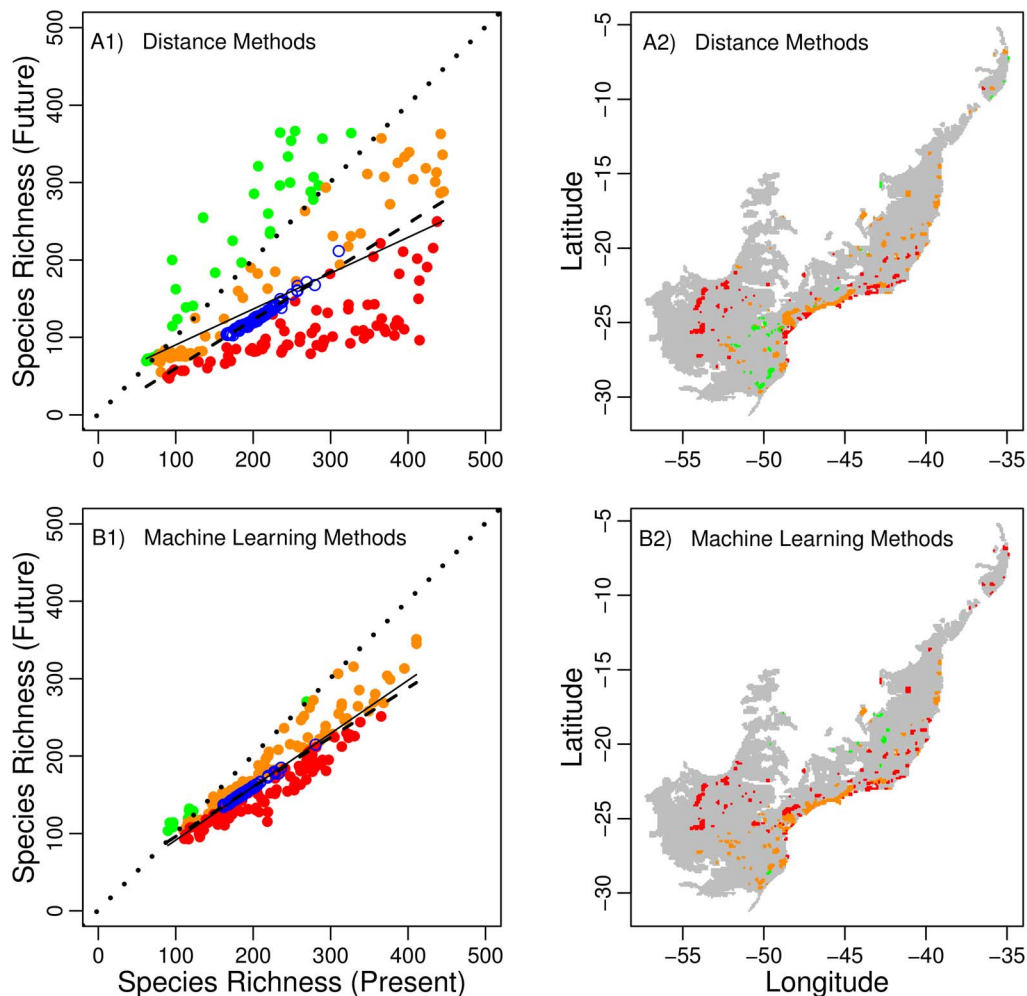

**Figure 6. Relationship between present and future tiger moth species richness in the Atlantic Forest Biodiversity Hotspot, Brazil.**

Modeled present and future species richness of protected areas (filled circles) in the Atlantic Forest biome (A1 and B1). Open blue circles indicate expected species richness according to a null model of random location of protected areas in the biome. Dashed lines are the extrapolated regressions of the expected species richness according to the null model (A1:  $y \sim -1.983 + 0.623 * x$ ; B1:  $y \sim 32.178 + 0.640 * x$ ). Filled red circles indicate protected areas predicted to have severe species richness losses, defined as those in which future species richness will be lower than the predicted by a null model of random location of protected areas (below dashed regression line). Orange filled circles indicate protected areas predicted to have mild species richness losses, defined as those in which future species richness will be higher than the predicted by a null model of random location of protected areas. Green filled circles indicate protected areas predicted to gain species richness. Solid lines indicate the regression of modeled species richness in the future against modeled species richness in the present (A1:  $y \sim 43.817 + 0.464 * x$ ,  $R^2 = 0.362$ ,  $F_{1,185} = 105.2$ ,  $P < 0.001$ ; B1:  $y \sim 22.736 + 0.688 * x$ ,  $R^2 = 0.850$ ,  $F_{1,185} = 1051.0$ ,  $P < 0.001$ ). Maps of protected areas predicted to gain (green) or lose (orange, red) species in future changing climate (A2 and B2).

doi:10.1371/journal.pone.0107792.g006

vegetation types in the Atlantic Forest will remain in the same regions of the current distribution. This last assumption can affect our species distribution model predictions. Species' range shifts outside of the current limits of the biome or their preferential habitat cannot be measured by our methods. Fourthly, the effectiveness of protected areas tends to be overestimated given that species were considered to be protected if any part of their range overlapped with protected areas polygons [81]. However, simple presence within a protected area is insufficient to ensure the long-term persistence of many species. Most existing protected areas in the Atlantic Forest were created without following any ecological criterion and species representation in this network is highly variable. Clearly, there is a need to update the current protected areas to improve species representation and climate change is an important factor to be considered.

As a final message, it is important to remember that species will generally alter their distributions independently. How do we prioritize which species to try to track through these changes? In this paper we recognize this conundrum and selected Tiger moths as our model group because of available data and diversity of species. It is now clear that we simply can't model or predict the response of all species on Earth to climate change. However, there are some generalities, such as the general tendency of species to move southward or uphill in the southern hemisphere that could be helpful, if combined with models like the one we presented here, to guiding decisions about how to better allocate finite resources for biodiversity conservation.



## Supporting Information

**Table S1** Tiger moth tribes, species, True Skill Statistics (TSS) for each ecological niche modeling method and the ensembles among distance methods (Euclidian and Gower distance and ENFA) and machine-learning methods (MaxEnt, GARP, and Artificial Neural Networks). (XLS)

**Table S2** Tiger moth tribes, species, and number of grid cells predicted to be occupied during baseline climate (1950–2000) and future climate (2051–2080) under different climate models and ecological niche modeling methods. (XLS)

**Table S3** Tiger moth tribes, species, and percent of range contraction predicted to during baseline climate (1950–2000) and

future climate (2051–2080) under different climate models and ecological niche modeling methods. (XLS)

**Table S4** Turnover measures for each of 11,464 grid cells overlaying the Atlantic Forest, Brazil, in this study. Turnover is shown for each modeling method (Euclidian and Gower distance, ENFA, MaxEnt, GARP, and Artificial Neural Networks), and climate model (CCCMA-CGCM, CSIRO-MK2, and HCCPR-HadCM3). Turnover found across the ensemble of distance and machine learning methods are also shown. (XLS)

## Author Contributions

Conceived and designed the experiments: VF RL. Analyzed the data: PL ASM. Wrote the paper: RL VF ASM PL.

## References

- Loucks C, Ricketts TH, Naidoo R, Lamoreux J, Hoekstra J (2008) Explaining the global pattern of protected area coverage: relative importance of vertebrate biodiversity, human activities and agricultural suitability. *J Biogeogr* 35: 1337–1348. doi:10.1111/j.1365-2699.2008.01899.x.
- Parnesan C (2006) Ecological and Evolutionary Responses to Recent Climate Change. *Ann Rev Ecol Evol Sys* 37: 637–669. doi:10.1146/annurev.ecolsys.37.091305.110100.
- Diniz-Filho JAF, Bini LM, Fernando Rangel T, Loyola RD, Hof C, et al. (2009) Partitioning and mapping uncertainties in ensembles of forecasts of species turnover under climate change. *Ecography* 32: 897–906. doi:10.1111/j.1600-0587.2009.06196.x.
- Scott JM, Davis FW, McGhie RG, Wright RG, Groves C, et al. (2001) Nature reserves: do they capture the full range of america's biological diversity? *Ecol Appl* 11: 999–1007.
- Araujo MB, Cabeza M, Thuiller W, Hannah L, Williams PH (2004) Would climate change drive species out of reserves? An assessment of existing reserve-selection methods. *Global Change Biol* 10: 1618–1626. doi:10.1111/j.1365-2486.2004.00828.x.
- Hannah L (2010) A global conservation system for climate-change adaptation. *Conserv Biol* 24: 70–77. doi:10.1111/j.1523-1739.2009.01405.x.
- Colwell RK, Brehm G, Cardelús CL, Gilman AC, Longino JT (2008) Global warming, elevational range shifts, and lowland biotic attrition in the wet tropics. *Science* 322: 258–261.
- Chen I, Hill JK, Ohlemüller R, Roy DB, Thomas CD (2011) Rapid range shifts of species associated with high levels of climate warming. *Science* 333: 1024–1026. doi:10.1126/science.1206432.
- Parnesan C, Ryrholm N, Stefanescu C, Hill JK, Thomas CD, et al. (1999) Poleward shifts in geographical ranges of butterfly species associated with regional warming. *Nature* 399: 579–583. doi:10.1038/21181.
- Lemes P, Loyola RD (2013) Accommodating Species Climate-Forced Dispersal and Uncertainties in Spatial Conservation Planning. *PLoS ONE* 8: e54323. doi:10.1371/journal.pone.0054323.
- Faleiro F V., Machado RB, Loyola RD (2013) Defining spatial conservation priorities in the face of land-use and climate change. *Biol Conserv* 158: 248–257. doi:10.1016/j.biocon.2012.09.020.
- Loyola RD, Lemes P, Nabout JC, Trindade-Filho J, Sagnori MD, et al. (2013) A straightforward conceptual approach for evaluating spatial conservation priorities under climate change. *Biodivers Conserv* 22: 483–485. doi:10.1007/s10531-012-0424-x.
- Dawson TP, Jackson ST, House JI, Prentice IC, Mace GM (2011) Beyond predictions: biodiversity conservation in a changing climate. *Science* 332: 53–58. doi:10.1126/science.1200303.
- Williams P, Hannah L, Andelman S, Midgley G, Araujo M, et al. (2005) Planning for Climate Change: Identifying Minimum-Dispersal Corridors for the Cape Proteaceae. *Conserv Biol* 19: 1063–1074. doi:10.1111/j.1523-1739.2005.00080.x.
- Mawdsley JR, O'Malley R, Ojima DS (2009) A review of climate-change adaptation strategies for wildlife management and biodiversity conservation. *Conserv Biol* 23: 1080–1089. doi:10.1111/j.1523-1739.2009.01264.x.
- Mawdsley J (2011) Design of conservation strategies for climate adaptation. *Wiley Interdisciplinary Reviews: Climate Change* 2: 498–515. doi:10.1002/wcc.127.
- Nori J, Urbina-Cardona JN, Loyola RD, Lescano JN, Leynaud GC (2011) Climate change and American Bullfrog invasion: what could we expect in South America? *PLoS ONE* 6: e25718. doi:10.1371/journal.pone.0025718.
- Loyola RD, Lemes P, Faleiro FV, Trindade-Filho J, Machado RB (2012) Severe loss of suitable climatic conditions for marsupial species in Brazil: challenges and opportunities for conservation. *PLoS ONE* 7: e46257. doi:10.1371/journal.pone.0046257.
- Tylianakis JM, Didham RK, Bascompte J, Wardle DA (2008) Global change and species interactions in terrestrial ecosystems. *Ecol Lett* 11: 1351–1363. doi:10.1111/j.1461-0248.2008.01250.x.
- Terborgh J, Lopez L, Nuñez P, Rao M, Shahabuddin G, et al. (2001) Ecological meltdown in predator-free forest fragments. *Science* 294: 1923–1926. doi:10.1126/science.1064397.
- Hannah L, Midgley G, Andelman S, Araujo M, Hughes G, et al. (2007) Protected area needs in a changing climate. *Frontiers Ecol Env* 5: 131–138.
- Peterson AT, Soberón J, Pearson RG, Anderson RP, Martínez-Meyer E, et al. (2011) Ecological Niches and Geographic Distributions. Levin SA, Horn HS, editors Princeton University Press. p.
- García RA, Burgess ND, Cabeza M, Rahbek C, Araujo MB (2012) Exploring consensus in 21st century projections of climatically suitable areas for African vertebrates. *Global Change Biol* 18: 1253–1269. doi:10.1111/j.1365-2486.2011.02605.x.
- Franklin J (2009) Mapping species distributions: spatial inference and prediction. Cambridge: Cambridge University Press.
- Araujo MB, Peterson AT (2012) Uses and misuses of bioclimatic envelope modeling. *Ecology* 93: 1527–1539.
- Peterson AT, Soberón J (2012) Species Distribution Modeling and Ecological Niche Modeling: Getting the Concepts Right. *Nat Conservação* 10: 102–107. doi:10.4322/natcon.2012.019.
- Rangel TF, Loyola RD (2012) Labeling Ecological Niche Models. *Nat Conservação* 10: 119–126. doi:10.4322/natcon.2012.030.
- Araujo MB, New M (2007) Ensemble forecasting of species distributions. *Trends Ecol Evol* 22: 42–47.
- Moilanen A, Possingham HP, Wilson KA (2009) Spatial conservation prioritization—past, present and future. In: Moilanen A, Wilson KA, Possingham HP, editors. *Spatial Conservation Prioritization: Quantitative Methods and Computational Tools*. Oxford, UK: Oxford University Press. pp. 260–268.
- Grimaldi D, Engel MS (2005) Evolution of the Insects. Grimaldi D, Engel MS, editors Cambridge University Press.
- Wasserthal LT (1997) The pollinators of the Malagasy star orchids *Angraecum sesquipedale*, *A. sororium* and *A. compactum* and the evolution of extremely long spurs by pollinator shift. *Acta Botanica* 110: 343–359.
- Pellinor O (2003) Yuccas, yucca moths, and coevolution: A review. *Ann Mo Bot Gard* 90: 35–55. doi:10.2307/3298524.
- Duarte M, Marconato G, Specht A, Casagrande M (2012) Lepidoptera. In: Rafael J, Melo G, Carvalho C, Casari S, Constantino R, editors. *Insetos do Brasil Diversidade e Taxonomia*. Ribeirão Preto: Holos Editora. pp. 625–682.
- Marquis RJ (1984) Leaf herbivores decrease fitness of a tropical plant. *Science* 226: 537–539.
- Bouchard M, Kneeshaw D, Bergeron Y (2006) Forest dynamics after successive spruce budworm outbreaks in mixedwood forests. *Ecology* 87: 2319–2329.
- Chapman SK, Hart SC, Cobb NS, Whitham TG, Koch GW (2003) Insect Herbivory Increases Litter Quality and Decomposition: an Extension of the Acceleration Hypothesis. *Ecology* 84: 2867–2876. doi:10.1890/02-0046.
- Speight M, Hunter M, Watt A (2008) *Ecology of Insects: Concepts and Applications*. Oxford, UK: Wiley Blackwell.
- Kocsis M, Hufnagel L (2011) Impacts of climate change on lepidoptera species and communities. *Applied Ecology and Environmental Reserach* 9: 43–72.
- Conrad KF, Woivod IP, Perry JN (2002) Long-term decline in abundance and distribution of the garden tiger moth (*Arctia caja*) in Great Britain. *Biol Conserv* 106: 329–337. doi:10.1016/S0006-3207(01)00258-0.
- Zahiri R, Holloway JD, Kitching IJ, Lafontaine JD, Mutanen M, et al. (2012) Molecular phylogenetics of Erebidae (Lepidoptera, Noctuoidea). *Syst Entomol* 37: 102–124. doi:10.1111/j.1365-3113.2011.00607.x.
- Heppner JB (1991) Faunal regions and the diversity of Lepidoptera. *Tropical lepidoptera* 2.

42. Ferro V, Diniz I (2010) Riqueza e composição das mariposas Arctiidae (Lepidoptera) no Cerrado. In: Diniz I, Marinho-Filho J, Machado R, Cavalcanti R, editors. Cerrado: conhecimento científico quantitativo como subsídio para ações de conservação. Brasília: Theraurus Editora. pp. 255–313.
43. Ferro VG, Melo AS (2010) Diversity of tiger moths in a Neotropical hotspot: determinants of species composition and identification of biogeographic units. *J Insect Conserv* 15: 643–651. doi:10.1007/s10841-010-9363-6.
44. Wagner DL, Conner WE (2008) The immature stages: structure, function, behavior, and ecology. In: Conner WE, editor. Tiger moths and woolly bears: Behavior, Ecology, and Evolution of the Arctiidae. Oxford: Oxford University Press. pp. 31–55.
45. Weller SJ, Jacobson NL, Conner WE (1999) The evolution of chemical defences and mating systems in tiger moths (Lepidoptera: Arctiidae). *Biol J Linn Soc* 68: 557–578. doi:10.1111/j.1095-8312.1999.tb01188.x.
46. Myers N, Mittermeier Ra, Mittermeier CG, da Fonseca GA, Kent J (2000) Biodiversity hotspots for conservation priorities. *Nature* 403: 853–858. doi:10.1038/35002501.
47. Ribeiro MC, Metzger JP, Martensen AC, Ponzoni FJ, Hirota MM (2009) The Brazilian Atlantic Forest: How much is left, and how is the remaining forest distributed? Implications for conservation. *Biol Conserv* 142: 1141–1153. doi:10.1016/j.biocon.2009.02.021.
48. Hijmans RJ, Cameron SE, Parra JL, Jones PG, Jarvis A (2005) Very high resolution interpolated climate surfaces for global land areas. *International Journal of Climatology* 25: 1965–1978. doi:10.1002/joc.1276.
49. Carpenter G, Gillison AN, Winter J (1993) DOMAIN: a flexible modelling procedure for mapping potential distributions of plants and animals. *Biodivers Conserv* 2: 667–680. doi:10.1007/BF00051966.
50. Hirzel AH, Haussler J, Chessel D, Perrin N (2002) Ecological-niche factor analysis: how to compute habitat-suitability maps without absence data? *Ecology* 83: 2027–2036.
51. Phillips S, Anderson R, Schapire R (2006) Maximum entropy modeling of species geographic distributions. *Ecol Model* 190: 231–259. doi:10.1016/j.ecolmodel.2005.03.026.
52. Stockwell DRB, Noble IR (1992) Induction of sets of rules from animal distribution data: a robust and informative method of data analysis. *Mathematics and Computers in Simulation* 33: 385–390. doi:10.1016/0378-4754(92)90126-2.
53. Manel S, Dias JM, Buckton ST, Ormerod SJ (1999) Alternative methods for predicting species distribution: an illustration with Himalayan river birds. *J Appl Ecol* 36: 734–747. doi:10.1046/j.1365-2664.1999.00440.x.
54. Pearson RG (2007) Species' Distribution Modeling for Conservation Educators and Practitioners: 1–50.
55. Allouche O, Tsoar A, Kadmon R (2006) Assessing the accuracy of species distribution models: prevalence, kappa and the true skill statistic (TSS). *J Appl Ecol* 43: 1223–1232. doi:10.1111/j.1365-2664.2006.01214.x.
56. Lobo JM, Jiménez-Valverde A, Real R (2008) AUC: a misleading measure of the performance of predictive distribution models. *Glob Ecol Biogeogr* 17: 145–151. doi:10.1111/j.1466-8238.2007.00358.x.
57. Marmion M, Parviainen M, Luoto M, Heikkinen RK, Thuiller W (2009) Evaluation of consensus methods in predictive species distribution modelling. *Divers Distrib* 15: 59–69. doi:10.1111/j.1472-4642.2008.00491.x.
58. Diniz-Filho JAF, Nabout JC, Bini LM, Loyola RD, Rangel TF, et al. (2010) Ensemble forecasting shifts in climatically suitable areas for *Tropidacris cristata* (Orthoptera: Acridoidea: Romaleidae). *Insect Conserv Div* 3: 213–221. doi:10.1111/j.1752-4598.2010.00090.x.
59. Faleiro FV., Machado RB, Loyola RD (2013) Defining spatial conservation priorities in the face of land-use and climate change. *Biol Conserv* 158: 248–257. doi:10.1016/j.biocon.2012.09.020.
60. IUCN, UNEP (2010) World Database on Protected Areas (WDPA). Annual Release: 1–9.
61. Griffith B, Scott JM, Adamcik R, Ashe D, Czech B, et al. (2009) Climate change adaptation for the US National Wildlife Refuge System. *Environ Manag* 44: 1043–1052.
62. Araújo MB, Alagador D, Cabeza M, Nogués-Bravo D, Thuiller W (2011) Climate change threatens European conservation areas. *Ecol Lett* 14: 484–492.
63. Pearson RG, Thuiller W, Araújo MB, Martinez-Meyer E, Brotons L, et al. (2006) Model-based uncertainty in species range prediction. *J Biogeogr* 33: 1704–1711. doi:10.1111/j.1365-2699.2006.01460.x.
64. Cardinale BJ, Srivastava DS, Duffy JE, Wright JP, Downing AL, et al. (2006) Effects of biodiversity on the functioning of trophic groups and ecosystems. *Nature* 443: 989–992. doi:10.1038/nature05202.
65. Zanuncio JC, Mezzomo JA, Guedes RNC, Oliveira AC (1998) Influence of strips of native vegetation on Lepidoptera associated with *Eucalyptus cloeziana* in Brazil. *For Ecol Manag* 108: 85–90. doi:10.1016/S0378-1127(98)00215-1.
66. Hódar J, Zamora R (2004) Herbivory and climatic warming: a Mediterranean outbreaking caterpillar attacks a relict, boreal pine species. *Biodivers Conserv* 13: 493–500.
67. Gutierrez AP, D'Oultremont T, Ellis CK, Ponti L (2006) Climatic limits of pink bollworm in Arizona and California: effects of climate warming. *Acta Oecol* 30: 353–364. doi:10.1016/j.actao.2006.06.003.
68. Logan JA, Régnière J, Powell JA (2003) Assessing the impacts of global warming on forest pest dynamics. *Frontiers Ecol Evol* 1: 130–137.
69. Singer RB, Breier TB, Flach A, Farias-Singer R (2007) The Pollination Mechanism of *Habenaria pleiophylla* Hoehne & Schlechter (Orchidaceae: Orchidinae). *Functional Ecosystems and Communities* 1: 10–14.
70. Diniz Filho JAF, Ferro VG, Santos T, Nabout JC, Dobrovolski R, et al. (2010) The three phases of the ensemble forecasting of niche models: geographic range and shifts in climatically suitable areas of *Utetheisa ornatrix* (Lepidoptera, Arctiidae). *Rev Bras Entomol* 54: 339–349. doi:10.1590/S0085-56262010000300001.
71. Yamanaka T, Tatsuki S., Shimada M (2001) Flight characteristics and dispersal patterns of fall webworm (Lepidoptera: Arctiidae) males. *Env Entomol* 30: 1150–1157.
72. Betzholtz PE (2002) Population structure and movement patterns within an isolated and endangered population of the moth *Dysauxes ancilla* L. (Lepidoptera, Ctenuchidae): implications for conservation. *J Insect Conserv* 6: 57–66.
73. Ferro VG, Romanowski HP (2012) Diversity and composition of tiger moths (Lepidoptera: Arctiidae) in an area of Atlantic Forest in southern Brazil: is the fauna more diverse in the grassland or in the forest? *ZOOLOGIA* 29: 7–18. DOI: 10.1590/S1984-46702012000100002
74. Ferro VG, Diniz IR (2007) Composição de espécies de Arctiidae (Insecta, Lepidoptera) em áreas de Cerrado. *Revta Bras Zool* 24: 635–646.
75. Klorvuttimontara S, McClean CJ, Hill JK (2011) Evaluating the effectiveness of Protected Areas for conserving tropical forest butterflies of Thailand. *Biol Conserv* 144: 2534–2540. doi:10.1016/j.biocon.2011.07.012.
76. Brooks T, Mittermeier R, Fonseca Gda (2006) Global Biodiversity Conservation Priorities. *Science* 313: 58–61.
77. Loyola RD, Kubota U, da Fonseca GAB, Lewinsohn TM (2009) Key Neotropical ecoregions for conservation of terrestrial vertebrates. *Biodivers Conserv* 18: 2017–2031. doi:10.1007/s10531-008-9570-6.
78. Loyola RD, Nabout JC, Trindade-filho J, Lemes P, Urbina-Cardona JN, et al. (2012) Climate change might drive species into reserves: a case study of the American bullfrog in the Atlantic Forest Biodiversity Hotspot. *Alytes* 29: 61–74.
79. Monzón J, Moyer-Horner L, Palamar MB (2011) Climate Change and Species Range Dynamics in Protected Areas. *BioScience* 61: 752–761. doi:10.1525/bio.2011.61.10.5.
80. Wiens JA, Seavy NE, Jongsomjit D (2011) Protected areas in climate space: What will the future bring? *Biol Conserv* 144: 2119–2125. doi:10.1016/j.biocon.2011.05.002.
81. Rodrigues A, Andelman S, Bakarr M, Boitani L (2004) Effectiveness of the global protected area network in representing species diversity. *Nature* 428. doi:10.1038/nature02459.1.
