# Supplementary material for: The Reduced Effectiveness of Protected Areas under Climate Change Threatens Atlantic Forest Tiger Moths
Source: PLoS One. 2014 Sep 17;9(9):e107792. doi: 10.1371/journal.pone.0107792 (PMC4168255; doi:10.1371/journal.pone.0107792)
Supplement: Table S3 — Tiger moth tribes, species, and percent of range contraction predicted to during baseline climate (1950–2000) and future climate (2051–2080) under different climate models and ecological niche modeling methods. (XLS) [file pone.0107792.s003.xls]

## Sheet: Table S2
Table S3. Tiger moth tribe, species, and percent of range contraction predicted to during baseline climate (1950-2000) and future climate (2051-2080) under different climate models and ecological niche modeling methods.
Tribe	Species	Climate model, CCCMA-CGCM2								Climate model, CSIRO-MK2								Climate model, HCCPR-HadCM3								Ensemble of climate models
		Distance methods				Machine learning methods				Distance methods				Machine learning methods				Distance methods				Machine learning methods				Distance methods	Machine learning methods
		Euclidian distance	Gower distance	ENFA	Ensemble	MaxEnt	GARP	Artificial neural networks	Ensemble	Euclidian distance	Gower distance	ENFA	Ensemble	MaxEnt	GARP	Artificial neural networks	Ensemble	Euclidian distance	Gower distance	ENFA	Ensemble	MaxEnt	GARP	Artificial neural networks	Ensemble
Arctiini	Aclytia flavigutta	-50.5529	-62.1854	27.2643	60.3698	54.24	-88.0464	-100	86.3121	-53.9805	-78.1167	39.0128	-69.8821	41.3333	-91.7602	-100	-90.8511	-63.2685	-61.7708	31.9083	-65.9432	156.96	-94.2747	-100	-93.4752	-66.0504	-95.1773
Arctiini	Aclytia heber	-43.6433	-47.3684	20.53	49.6577	70.7427	NA	306.851	2264.73	-39.229	-47.3684	29.5706	-48.146	59.0674	NA	306.851	2065.98	-58.9464	-58.1747	9.61087	-63.1774	165.147	NA	306.851	3177.18	-58.4427	2554.77
Arctiini	Aclytia punctata	-56.743	-35.261	-0.22242	35.261	0	-41.8202	0	0	-60.7506	-60.8434	-7.32874	-60.8434	0	-38.1365	0	0	-78.7214	-56.4659	-7.00623	-56.4659	0	-61.2405	0	0	-63.5743	0
Arctiini	Aclytia terra	-68.3946	-28.2752	-6.54646	61.4388	-43.6298	NA	58.2324	35.8276	-67.4132	-35.3666	-8.29404	-62.6763	-70.7722	NA	52.4704	-57.4827	-83.0901	-39.6935	-0.36061	-72.8058	-8.08081	NA	56.2422	8.17641	-70.8777	-31.2686
Arctiini	Aemilia pagana	-94.9765	-92.5267	36.8775	93.5606	-97.9722	-91.3028	0	91.7737	-94.741	-91.637	45.7604	-91.4773	-98.8992	-92.4771	0	-92.8497	-100	-99.2883	59.7577	-99.2424	-99.1889	-89.1743	0	-89.7605	-95.2652	-94.7241
Arctiini	Aethria analis	-44.2314	-24.8968	-4.82989	42.8472	-2.48302	NA	0	2.48302	-46.2617	-18.5456	-9.48632	-48.8396	-32.3495	NA	0	-32.3495	-57.8311	-25.5637	6.13742	-56.2695	39.7048	NA	0	39.7048	-54.3471	-1.92082
Arctiini	Aethria haemorrhoidalis	188.589	-56.0373	5.76478	43.1684	233.798	-68.2839	-99.5957	83.8467	111.111	-66.4419	8.50701	-56.1507	176.561	-80.0722	-99.8267	-88.5029	491.592	-62.7489	1.5844	-47.6623	278.654	-79.0297	-99.4513	-77.6146	-52.5647	-91.7264
Arctiini	Aethria melanobasis	-50.0969	-45.9758	12.6535	49.6633	2.72312	-34.2612	0	7.78737	-51.3562	-50.8813	18.7694	-53.7558	-8.03021	-43.6525	0	-16.3196	-63.061	-54.0879	13.2862	-60.8876	-5.56549	-38.0239	0	-14.4405	-56.9159	-15.1684
Arctiini	Aethria paula	-63.9969	-56.794	-8.00381	69.3521	268.366	-21.5325	-100	49.5726	-69.4495	-66.073	1.21486	-71.803	258.436	-45.1988	-100	-55.5556	-72.6846	-71.0428	-16.0314	-80.9512	461.951	-54.7042	-100	-28.8267	-76.001	-62.4709
Arctiini	Agaraea minuta	-43.9462	-60.7249	19.3597	52.5944	6.89502	-51.4134	215.909	51.3026	-47.87	-64.6455	21.2034	-51.3906	2.62456	-65.1943	263.636	-31.4629	14.4619	-65.9904	24.1311	-42.5903	126.112	-71.7903	370.455	18.4369	-61.7684	-48.6974
Arctiini	Agaraea semivitrea	-33.2208	-31.3211	7.64093	39.7965	82.7852	-67.6394	-99.6749	75.4234	-31.9913	-34.4124	16.8982	-34.6294	68.6242	-80.6096	-99.4148	-84.3453	-51.6152	-49.7521	9.89848	-53.81	177.752	-74.9351	-95.6112	-36.2247	-44.0762	-83.354
Arctiini	Agaraea sp.	-70.0163	-72.6899	9.79355	76.6045	-88.9166	-44.7089	0	68.1755	-73.2031	-84.6817	17.7419	-85.2441	-93.1219	-57.1646	0	-76.3416	-78.2973	-57.8645	13.5226	-72.1064	-76.5146	-60.4051	0	-66.4256	-84.2567	-87.0975
Arctiini	Agaraea uniformis	-86.2138	-75.0989	10.798	80.4284	-88.3282	NA	-100	94.0043	-89.0273	-82.6517	17.4841	-85.7838	-92.4476	NA	-100	-96.531	-96.5836	-75.2309	8.23572	-80.5907	-92.2073	NA	-100	-96.8308	-89.0295	-96.5739
Arctiini	Agerocha eone	-72.0539	-72.0297	-3.23982	72.504	16.3416	-27.0211	0	5.59263	-75.5331	-78.0693	8.85055	-75.2269	1.52873	-46.9774	0	-17.6994	-90.3479	-89.8515	-12.5869	-90.1762	77.7807	-43.6514	0	23.3238	-76.1345	-14.6965
Arctiini	Agylla argentea	-81.3648	-59.403	39.117	63.494	-71.0181	-68.5964	-100	87.8564	-85.3675	-71.0218	43.1159	-75.0904	-80.525	-77.2131	-100	-89.6264	-90.2231	-61.3548	20.8535	-64.247	-36.6442	-62.8745	-100	-78.0236	-79.8494	-90.0197
Arctiini	Agylla argentifera	-64.9674	-71.4867	16.4608	72.0145	-80.2356	-67.0707	0	79.2405	-64.2835	-74.8757	22.0402	-74.1561	-85.6059	-83.2323	0	-85.1412	-80.4165	-86.4889	26.8702	-85.9528	-84.1286	-88.6869	0	-84.187	-79.3103	-85.0828
Arctiini	Agylla marcata	-72.7273	-47.6113	2.71431	47.6113	-30.9793	-44.6541	0	35.7566	-75.3342	-62.996	3.42716	-62.996	-8.94539	-52.6587	0	-36.5468	-16.1096	-84.6154	3.28094	-84.6154	186.911	-90.6232	0	26.6693	-79.2713	-60.885
Arctiini	Agylla nivea	-80.6867	-52.261	1.6964	52.267	-51.4275	-20.0057	0	25.4491	-83.834	-68.2643	-0.28689	-69.4596	-33.502	-28.2987	0	-21.3373	-94.2775	-63.9047	-9.44243	-54.9148	4.77051	-32.4309	0	-4.17166	-81.3565	-42.6148
Arctiini	Agylla polysemata	-65.3368	-70.1909	17.585	68.6332	-26.9268	-37.8238	0	25.857	-73.7083	-81.8953	23.6962	-80.1759	-37.8466	-65.5205	0	-39.014	-62.6553	-71.6054	12.7746	-71.3082	20.7497	-20.8196	0	7.34574	-80.1392	-42.7196
Arctiini	Agylla separata	-82.9776	-70.7753	32.8778	70.1852	-90.0754	NA	-100	36	-84.3404	-80.55	39.9811	-79.4766	-92.2809	NA	-100	-56	-95.7573	-71.1067	45.5825	-74.0076	-94.4864	NA	-100	-60	-76.0953	-56.5714
Arctiini	Agylla sp.9	-59.8268	-51.4118	9.55056	55.6549	-8.58726	-61.1111	0	8.63322	-61.7749	-60.917	11.8695	-62.0031	-27.3026	-90.7407	0	-27.3529	-73.9827	-63.1535	13.1485	-68.0123	19.633	-35.1852	0	19.6021	-72.1109	-3.44291
Arctiini	Agyrta albisparsa	-30.4582	-14.1153	-25.6174	72.1678	142.135	104.45	-100	-17.2414	-45.4627	-38.5686	-9.1977	-86.6013	62.744	162.042	-100	41.1568	-21.3537	48.9066	-24.4961	-40.5229	266.073	169.895	-100	272.97	-72.658	52.7253
Arctiini	Agyrta dux	-27.6783	-79.2096	0.566893	79.2096	236.334	-9.23623	0	-149.279	-40.0847	-87.8007	-1.90854	-87.8007	239.116	3.49319	0	150.456	-58.8082	-53.6082	0.0755858	-53.6082	282.938	5.3286	0	181.307	-41.0653	145.099
Arctiini	Agyrta micilia	-61.0851	-70.3892	30.5933	57.5527	3.43206	-35.4704	0	23.318	-60.2219	-74.9577	34.7536	-58.3724	-26.3752	-36.3296	0	-33.6727	-69.7904	-69.4585	12.4309	-72.3068	124.071	-64.0449	0	-4.51726	-67.1253	-26.006
Arctiini	Amaxia chaon	-87.8767	-41.9512	-7.97163	66.7925	90.3837	-82.6469	-94.4984	68.5682	-91.2329	-60.4336	-5.90071	-76.0168	85.5007	-88.7644	-95.9008	-77.9236	-86.0959	-41.626	-27.234	-69.6436	257.997	-77.3471	-86.9471	33.3143	-74.3396	-79.749
Arctiini	Amaxia collaris	-30.6978	-64.5969	5.17351	65.4191	65.8855	-100	313.009	-93.5721	-25.5966	-71.4325	8.82353	-67.9588	66.0042	-100	313.009	93.4382	-51.8674	-79.0305	12.8121	-78.6519	87.0958	-100	313.009	131.001	-68.3788	98.5604
Arctiini	Amaxia corata	24.1573	-64.7318	-66.6027	45.155	151.082	-22.0669	0	-1.56625	3.13002	-81.5303	-60.2439	-63.9535	111.598	-33.4039	0	-9.47329	107.865	-43.1838	-71.9474	-37.2739	304.691	-26.3165	0	12.2016	-63.2429	2.43779
Arctiini	Amaxia dyuna	-80.5026	-57.275	36.0271	60.8779	-91.6102	-66.9476	0	77.669	-82.531	-71.9209	33.1029	-73.7723	-90.9887	-74.6839	0	-81.7473	-92.4917	-76.7709	32.1089	-78.6831	-96.5537	-80.3733	0	-85.9706	-84.5267	-93.0941
Arctiini	Amaxia hebe	-78.8583	-35.394	12.959	53.9169	-61.1601	-94.9479	-100	84.7791	-79.2886	-40.6572	19.659	-59.9632	-72.7893	-96.1198	-100	-89.4397	-77.6248	-39.0699	7.23653	-58.0442	-13.7902	-97.3177	-100	-52.9634	-65.2471	-87.2037
Arctiini	Amaxia kennedyi	-69.1465	-73.9788	11.3398	73.9484	-13.2681	-53.617	-82.7493	60.8095	-73.0769	-83.056	9.16916	-80.4613	-32.4989	-68.2979	-84.3666	-67.9171	-74.0595	-78.5174	4.49102	-74.6269	47.7242	-61.3475	46.0916	34.9457	-84.0344	-72.1619
Arctiini	Amaxia pardalis	-82.6667	-80.8511	9.28709	80.8511	-97.2797	NA	0	97.2797	-88.086	-90.7801	8.13102	-90.7801	-97.4429	NA	0	-97.4429	-97.8065	-95.6856	9.47013	-95.6856	-96.5724	NA	0	-96.5724	-89.2435	-97.2797
Arctiini	Amaxia pyga	-25.8141	-53.8669	3.32378	53.8669	192.389	-72.0557	-21.7391	57.8462	-41.0957	-67.0863	3.99236	-67.0863	194.572	-77.0732	-13.0435	-60.9231	-43.8094	-49.6403	4.7851	-49.6403	330.737	-66.6202	130.435	12.3077	-36.7806	-69.5385
Arctiini	Ammalo helops	-62.6193	-58.0445	17.0235	61.1034	-67.7314	148700	0	53.4876	-67.1914	-62.4053	24.8391	-64.1397	-78.6832	136100	0	-67.4707	-69.1844	-59.7429	13.3456	-66.4616	-34.9087	64700	0	-22.2295	-64.9931	-37.1252
Arctiini	Ammalo travassosi	-80.067	-76.9803	32.8555	71.777	-85.8293	-42.4631	0	62.2542	-84.9246	-82.2435	33.9236	-89.4599	-86.7633	-57.9254	0	-71.5162	-99.33	-77.0867	2.54356	-75.0871	-42.8019	-31.7016	0	-32.2055	-91.5505	-77.6486
Arctiini	Antichloris eriphia	-68.4385	-72.7511	21.7621	75.2189	62.4586	-73.1702	0	36.2069	-78.1146	-83.8731	27.4458	-84.0091	38.8652	-78.7673	0	-48.4914	-72.8821	-71.4426	-1.6398	-78.2355	155.035	-73.5327	0	-1.46552	-82.2575	-33.125
Arctiini	Apiconoma opposita	-65.021	-51.3482	0.282628	51.3482	9.11502	-9.42393	-9.09091	17.0034	-68.4525	-65.8851	2.27112	-65.8851	15.6981	-21.743	172.727	-24.3547	-76.1346	-65.6506	4.80468	-65.6506	37.497	-34.771	718.182	-23.4007	-50.1758	-26.5432
Arctiini	Apistosia judas	-61.0939	-62.4265	22.0702	63.6018	-84.3005	NA	0	84.3005	-58.4719	-70.1021	26.6464	-70.26	-88.9718	NA	0	-88.9718	-78.5734	-77.1278	28.3181	-80.1839	-88.731	NA	0	-88.731	-71.655	-88.0327
Arctiini	Areva subfulgens	-69.9836	-54.8703	31.2768	62.0482	-32.9845	-84.4221	-78.801	69.8267	-72.7248	-65.3026	36.4982	-65.9365	-42.7283	-87.224	-92.3362	-76.0706	-77.8783	-63.6599	15.7553	-70.8927	18.6575	-84.6353	-35.7231	-45.1782	-67.9901	-66.6558
Arctiini	Areva trigemmis	-62.493	-54.1691	-14.0808	49.8454	3.89432	-28.314	0	1.417	-67.4736	-68.8197	-9.55077	-63.3118	7.27397	-36.0191	0	3.63023	-73.9288	-65.7076	-29.6212	-65.4484	15.766	-36.599	0	10.2969	-66.2356	4.02159
Arctiini	Argyroeides braco	-48.9588	-36.9177	0.617178	49.7153	8.81235	-99.0938	0	36.1854	-51.5618	-44.5799	6.34322	-55.4316	-2.66033	-98.7766	0	-42.7531	-63.3997	-49.5429	10.0806	-62.3093	-1.33017	-99.6526	0	-42.319	-58.4605	-40.4145
Arctiini	Argyroeides ophion	-50.2444	-37.7201	4.57895	46.7595	-6.23324	-18.3283	0	15.9001	-56.9467	-45.0113	12.5526	-54.6098	-37.366	-34.3927	0	-41.0863	-59.111	-44.6727	11.3553	-57.0059	21.5483	-47.3226	0	-8.58519	-53.5372	-27.9238
Arctiini	Argyroeides sanguinea	-65.6226	-52.6847	3.36719	62.4192	-73.4016	-71.7263	0	66.0629	-72.4981	-58.677	9.35022	-67.6593	-84.0574	-73.7318	0	-74.5843	-79.8574	-59.2998	8.07013	-75.1154	-67.0492	-94.3374	0	-75.861	-70.1524	-72.12
Arctiini	Argyroeides variegata	-86.3202	-80.5914	7.97619	81.9857	-98.759	NA	0	98.759	-84.5281	-79.3548	12.8571	-80.8598	-98.3671	NA	0	-98.3671	-100	-91.5054	7.90043	-93.5005	-99.6081	NA	0	-99.6081	-91.8117	-98.759
Arctiini	Aristodaema hanga	-72.7228	-48.5859	-5.47649	63.8134	-79.2015	-92.8605	-35.4779	88.6127	-76.2488	-54.3687	0.533672	-68.8627	-84.2773	-96.1341	-52.6961	-91.643	-85.5289	-54.596	-0.673443	-74.8257	-66.1096	-92.9228	-33.6496	-81.6998	-74.6333	-90.2936
Arctiini	Atyphopsis roseiceps	-63.834	-20.3616	11.5421	34.6971	224.511	NA	275.278	-974.41	-75.2964	-27.2406	20.0054	-42.919	187.406	NA	275.278	870.311	-31.1265	-12.4607	8.72101	-23.0527	272.481	NA	275.278	1106.83	-42.1322	1029.57
Arctiini	Baritius acuminata	-57.6586	-45.4837	22.0557	49.7722	-58.1304	40.9091	-100	17.2043	-61.787	-50.8763	29.8583	-55.2733	-76.7702	25.0303	-100	-55.7348	-70.702	-53.3536	24.662	-63.1745	-32.0739	-13.8788	-100	8.60215	-58.8122	-38.6201
Arctiini	Belemnia eryx	-26.6085	-55.3522	-10.5731	30.6057	-0.771208	-55.1791	0	35.112	-36.8048	-76.761	-6.99556	-50.3494	-10.0257	-59.9647	0	-45.6619	-20.9378	-38.2696	-48.8891	-56.8142	117.652	-60.9282	0	-15.5329	-62.4927	-43.761
Arctiini	Bernathonomus piperita	-59.698	-70.5558	-6.27398	76.0512	-90.7909	-78.9732	-100	94.1176	-65	-79.3917	1.1261	-82.0057	-92.2391	-84.7867	-100	-96.8457	-72.6846	-66.8327	-3.30405	-76.8608	-88.3401	-93.7712	-100	-97.4425	-84.4607	-97.9113
Arctiini	Bertholdia albipuncta	-78.7321	-63.58	-20.1847	76.1883	16.6288	-87.1596	0	63.6927	-84.3899	-78.1991	1.60882	-84.3236	-3.50763	-91.6915	0	-73.4771	-91.3429	-59.6792	-18.8738	-88.117	98.9607	-91.3372	0	-42.965	-87.9799	-60.4492
Arctiini	Bertholdia almeidai	-82.9064	-74.6217	23.1761	84.518	-90.5605	-48.0893	-100	96.277	-84.631	-83.5711	34.0723	-87.6339	-96.4602	-52.3211	-100	-98.248	-95.1306	-73.8867	38.4388	-86.433	-98.2793	-51.2183	-100	-99.8631	-89.9383	-99.0966
Arctiini	Bertholdia myosticta	-26.9895	-53.7917	6.16613	53.7917	165.969	-6.99239	136.702	-70.2049	-36.6286	-52.5	5.57612	-52.5	167.325	-2.57461	203.546	83.6574	-61.4212	-58.25	11.025	-58.25	194.308	-48.4786	181.915	51.0772	-43.875	63.0583
Arctiini	Bertholdia pseudofumida	-62.0888	-38.5201	-12.7369	50.7534	108.715	-37.36	-100	17.5397	-63.5425	-37.2144	-9.38224	-47.2587	80.5358	-55.6	-100	-19.5238	-63.7337	-51.877	-5.15478	-58.5444	98.3538	-46.64	-100	-21.9048	-57.9352	-43.4921
Arctiini	Bertholdia soror	-55.5899	-55.6793	11.2436	56.2316	-34.6256	-100	0	34.6256	-61.2789	-67.0874	18.5048	-62.8377	-52.0712	-100	0	-52.0712	-67.0783	-72.0861	26.2907	-66.8104	-51.1418	-100	0	-51.1418	-61.9523	-47.1588
Arctiini	Bertholdia specularis	-59.2699	-50.4328	24.3529	56.0811	-21.1309	-92.0604	-100	91.2233	-68.0368	-59.3157	30.7865	-62.0096	-43.8449	-94.2141	-100	-94.6794	-72.6933	-51.216	20.4206	-60.68	8.52989	-85.5352	-100	-90.0864	-64.0802	-92.9968
Arctiini	Biturix rectilinea	-75.3441	-40.7653	12.8504	50.3832	-97.6407	NA	-100	78.3784	-78.664	-47.7041	18.8867	-59.9898	-99.3345	NA	-100	-90.5405	-91.7409	-64.4898	23.9437	-76.0858	-99.4555	NA	-100	-100	-69.6985	-90.5405
Arctiini	Callopepla emarginata	-59.2569	-69.1397	29.6685	58.3026	-5.56084	-1.56039	-59.6874	24.431	-58.3438	-79.5975	36.2469	-67.5612	-29.2063	-0.613331	-73.2475	-42.0334	-66.0264	-67.6796	19.696	-68.2992	47.4335	-8.51448	-34.5897	17.3558	-67.2258	-33.8581
Arctiini	Callopepla flammula	-66.4276	-58.979	6.68816	66.3434	-1.21921	-84.2105	0	1.21921	-70.2897	-63.1231	8.28999	-69.1386	3.75715	-96.4912	0	3.75715	-87.7793	-96.8769	9.33014	-87.4786	19.582	-100	0	19.582	-79.3497	6.09604
Arctiini	Callopepla inachia	-67.3056	-57.4779	11.7407	72.2222	-97.3451	-61.5639	-100	97.7922	-73.0292	-64.102	19.2961	-77.3261	-98.0088	-68.025	-100	-98.5714	-81.8575	-60.6871	12.9094	-81.2782	-95.6305	-82.6358	-100	-98.7879	-80.2168	-98.4848
Arctiini	Callopepla similis	-52.9621	-46.4314	3.25293	45.111	4.67771	-35.2555	-100	18.4288	-49.9605	-49.9337	9.15231	-48.6908	-6.75918	-44.1659	-100	-16.63	-74.0916	-57.575	12.4742	-61.5844	-4.61056	-53.2305	-100	-40.1615	-60.1922	-28.5609
Arctiini	Calodesma amica	-76.7989	-81.7445	75.6224	73.5169	-92.7799	-100	-9.6637	88.8502	-80.8705	-89.7196	74.1028	-81.1864	-94.4024	-87.5	-7.46038	-92.1022	-89.4349	-88.5981	72.4539	-85.1271	-94.6728	-100	99.4588	-77.4681	-85.8475	-87.8049
Arctiini	Calodesma collaris	-58.2483	-46.0225	-13.2025	59.5707	32.6507	-43.4556	551.667	-41.2593	-62.2449	-52.0674	-3.52165	-60.6439	3.32196	-52.0621	615	3.12068	-67.3682	-51.1011	-19.8112	-66.3163	64.8464	-31.8863	1141.11	88.2077	-65.6811	34.8246
Arctiini	Calodesma contracta	-36.1269	-61.7195	-7.77913	61.7195	-2.20513	-49.3731	0	29.4487	-38.2693	-75.1131	-2.00541	-75.1131	-32.4359	-51.9489	0	-43.0494	-52.1739	-46.1538	2.1733	-46.1538	49.5641	-55.5961	0	-20.3684	-27.3303	-29.5401
Arctiini	Calodesma quadrimaculata	-33.8824	-50.5419	-13.3267	50.3861	-2.55668	-62.0721	0	16.141	-64.7059	-66.9951	2.19969	-71.8147	-32.8027	-64.4144	0	-37.3442	11.6471	-5.41872	-12.7125	-15.1544	43.9942	-56.8919	0	20.1129	-58.1081	-35.0273
Arctiini	Calonotos fenestratus	-72.4953	-76.0105	19.847	73.2234	2.09193	-46.5753	0	10.3359	-78.6559	-80.105	25.6676	-78.7948	-9.45787	-41.2481	0	-20.7367	-80.2116	-76.273	10.9282	-76.2365	82.1744	-49.2136	0	43.0986	-78.7379	-28.0823
Arctiini	Carales astur	-65.7389	-42.8351	22.9882	56.8622	-72.5012	-95.4853	296.163	51.034	-67.23	-49.1012	34.5733	-58.3144	-82.2095	-97.7427	296.163	-66.322	-73.9563	-54.0832	15.4722	-65.5752	-30.2248	-100	296.163	16.5436	-63.9806	-23.5598
Arctiini	Carales maculicollis	-86.2925	-92.0626	39.5137	90.1994	-48.8785	NA	0	43.0824	-90.394	-93.9911	44.9606	-92.1252	-61.2925	NA	0	-54.2971	-93.2542	-92.0067	38.1282	-91.2311	-48.0124	NA	0	-43.8596	-93.7758	-47.5905
Arctiini	Carathis australis	-65.8963	-77.7857	9.03301	82.3766	-84.5407	NA	-57.6356	82.8883	-68.8676	-76.7921	15.9995	-80.8661	-88.8714	NA	-71.7268	-88.926	-86.6953	-90.1348	19.5737	-91.0373	-90.9711	NA	-35.194	-89.5631	-83.2326	-84.7998
Arctiini	Carathis byblis	-41.129	-37.1308	-76.6076	53.3646	325.917	-32.5363	-100	-85.7678	-71.9758	-58.3544	-69.304	-69.9531	299.715	-45.1555	-100	19.8502	109.677	-32.7848	-83.5539	-49.6088	332.07	-30.8639	-100	125.302	-67.4491	87.6821
Arctiini	Castrica phalaenoides	125.271	-61.1063	-65.5089	46.709	210.354	47.7909	-100	0.325733	119.183	-75.0216	-61.3355	-60.4176	200.607	75.9801	-100	9.02745	173.311	-52.4633	-68.2149	-44.5756	263.676	43.2483	-100	56.9567	-51.3391	10.1908
Arctiini	Cercopimorpha dolens	-72.1481	-72.7241	31.2872	69.3333	-23.0047	-36.6205	0	26.596	-78.986	-82.652	32.2111	-79.3488	-32.2826	-45.0692	0	-34.7458	-83.6558	-79.8351	13.5046	-79.969	25.1733	-53.9216	0	-10.0141	-79.3488	-35.4096
Arctiini	Cercopimorpha postflavia	-58.9652	-41.9906	33.6931	46.3511	15.8527	-45.2015	-44.6281	83.4416	-63.0663	-52.7091	33.6931	-57.9635	11.5025	-40.6785	-7.43802	-79.5455	-71.3162	-58.8339	-6.50712	-65.4832	59.4609	-64.1345	-41.3223	-66.1255	-63.5602	-87.3377
Arctiini	Chetone isse	-17.5995	-27.8987	7.14888	20.5701	104.168	-33.6735	0	-61.9602	-40.1039	-35.4065	6.73766	-33.8242	109.342	-32.8331	0	66.2789	-57.7611	-68.7694	11.7988	-62.2803	116.967	-61.9248	0	67.012	-37.7672	61.9442
Arctiini	Chionosia apicalis	-61.0143	-53.9653	-32.267	56.1698	0	NA	20000	-20000	-69.8891	-54.3592	-3.69755	-51.6799	0	NA	27100	27100	-74.2868	-73.5819	-16.6182	-77.8558	0	NA	23500	23500	-66.7685	18800
Arctiini	Chrysostola dycladioides	-74.579	-61.479	21.1948	65.7605	43.7613	-89.3398	274.787	-12.5946	-78.5084	-73.1255	27.6443	-73.3778	7.30641	-90.2903	274.787	8.63373	-86.2069	-69.0544	1.30346	-79.7384	83.5091	-90.4958	274.787	109.746	-75.2757	21.5398
Arctiini	Cissura decora	-20.0397	-48.4669	-0.611855	55.1736	-66.5065	-74.2465	-100	73.1183	-23.2143	-52.6871	9.53474	-58.7527	-73.0954	-79.1406	-100	-84.639	-17.1958	-41.8068	0.0382409	-47.0588	-29.7186	-75.9773	-100	-52.9186	-62.0482	-80.5684
Arctiini	Cisthene rosacea	-56.6737	-79.811	-4.8271	75.5424	27.3325	NA	33.5753	-20.3431	-58.3042	-87.2441	-0.259648	-78.8215	25.5626	NA	85.6624	93.3824	-80.0839	-90.8661	-0.436681	-88.9793	55.3982	NA	101.633	86.0294	-83.1114	75
Arctiini	Cisthene ruficollis	-54.9985	-42.6837	4.04239	42.6837	3.91355	-36.4486	0	-0.260756	-63.8948	-50.9159	4.14556	-50.9159	10.3193	-52.3364	0	5.53176	-81.9627	-72.324	4.6239	-72.324	15.479	-20.0935	0	12.2369	-62.5469	5.62488
Arctiini	Cisthene triplaga	-58.2627	-76.2797	2.74931	76.2797	4.94954	-45.973	0	17.7971	-74.7881	-86.6619	2.87384	-86.6619	-33.8779	-65.9121	0	-46.9769	-66.1017	-69.2141	5.45071	-69.2141	101.73	-5.0936	0	36.2513	-84.3547	-30.9411
Arctiini	Clemensia inleis	-51.6384	-41.4226	162.782	38.5599	0	50	16.8759	-16.899	-48.4171	-44.2469	166.332	-37.6958	0	-50	14.993	14.9477	-73.549	-72.4895	166.44	-69.1449	0	-100	41.7015	41.6028	-48.3888	15.4355
Arctiini	Clemensia marmorata	-70.0415	-74.3039	3.82684	69.7442	-71.2847	-75.2809	138.697	99.3865	-70.9129	-73.7239	6.75381	-71.0232	-83.2774	-86.7041	191.762	-100	-90.332	-80.1624	4.73619	-84.7322	-82.4229	-91.3858	165.9	-100	-80.6155	-100
Arctiini	Clemensia panthera	-75.5092	-75.2731	5.66078	75.2731	-87.5768	NA	0	87.5768	-83.3172	-79.1129	6.65035	-79.1129	-91.0125	NA	0	-91.0125	-91.7071	-89.1096	7.84209	-89.1096	-93.2651	NA	0	-93.2651	-84.8726	-91.0125
Arctiini	Cloesia digna	-46.7706	-55.9404	-32.617	57.5211	0	-31.4599	-53.8462	32.1762	-65.9243	-68.7878	-28.2731	-67.8873	0	-51.4736	-76.9231	-52.2029	-42.2049	-63.23	-43.2861	-65.0704	0	8.43043	56.4103	9.67957	-68.2254	-41.4553
Arctiini	Coreura fida	-41.0918	-39.2802	20.2062	38.2455	-4.10898	NA	0	4.10898	-42.7149	-50.8804	28.1353	-46.6126	-32.7825	NA	0	-32.7825	-49.2807	-47.9544	9.6868	-46.96	37.941	NA	0	37.941	-51.4765	-1.96516
Arctiini	Correbidia euryptera	-49.8971	-53.4398	11.4845	53.4398	2.28582	-58.74	96.875	54.3459	-57.8971	-60.3483	13.5717	-60.3483	3.29374	-67.4357	106.25	-62.8622	-64.5257	-70.0145	14.6848	-70.0145	18.0886	-64.9512	659.375	-48.4636	-49.3469	-67.691
Arctiini	Correbidia joinvillea	-73.4716	-70.6183	20.1768	76.9057	-62.2492	-88.1317	-100	88.1835	-74.809	-80.1279	29.8302	-82.7519	-68.1808	-87.72	-100	-88.8237	-81.2227	-59.3603	11.281	-74.5155	-25.6229	-87.3367	-100	-81.4084	-80.2326	-90.5575
Arctiini	Correbidia sp.1	-69.7607	-81.0762	9.79051	77.4362	-65.1589	-73.3002	0	65.1529	-75.7796	-86.0339	12.8623	-82.7726	-78.1418	-71.3101	0	-77.3633	-80.3481	-75.0907	6.90329	-78.1323	-46.0147	-78.607	0	-47.7525	-84.4548	-75.7646
Arctiini	Correbidia sp.3	-87.8276	-77.7583	7.22222	77.7583	-82.0764	-55.2201	-100	86.0575	-90.9552	-77.0578	9.44444	-77.0578	-80.1515	-58.087	-100	-86.3851	-99.2392	-79.8599	9.28571	-79.8599	-39.0975	-68.0198	46.1538	-70.7681	-83.8879	-85.5843
Arctiini	Cosmosoma achemon	-70.8346	-42.3141	2.40503	56.9817	4.09634	-28.6695	18.6216	-18.1882	-76.0395	-60.5307	6.3385	-64.2857	10.1482	-64.7835	15.9708	3.76307	-89.1116	-65.4554	11.6318	-72.986	15.6237	-51.3728	35.3545	23.8676	-68.5822	3.20557
Arctiini	Cosmosoma auge	-55.1511	-53.0323	8.9952	54.7236	-83.0482	NA	-99.8292	82.0761	-51.6087	-56.524	15.1714	-58.1589	-86.4254	NA	-99.8804	-86.7519	-73.2207	-62.8774	6.31653	-66.5593	-66.886	NA	-99.8975	-68.2045	-64.8148	-85.9414
Arctiini	Cosmosoma centralis	-57.6054	-55.7561	20.9349	58.0132	-78.054	-81.6265	3101.4	6.88807	-59.1428	-63.0196	31.3375	-62.8552	-83.763	-86.9729	3101.4	-26.1993	-70.9294	-61.6948	18.4389	-66.6515	-60.4665	-64.2319	3101.4	77.7368	-68.1519	4.42804
Arctiini	Cosmosoma chrysis	-84.4397	-45.2122	-23.9164	69.524	81.5233	NA	2.0156	-79.2474	-89.7327	-49.3789	-21.0636	-75.8581	30.677	NA	-0.520156	46.0661	-82.4925	-52.8986	-12.5883	-71.3256	125.071	NA	71.5215	245.61	-76.0478	91.9042
Arctiini	Cosmosoma cingla	-7.62503	-4.84339	-1.90188	15.2954	201.432	-100	-100	100	-15.0034	2.05916	-5.77048	-17.9592	164.668	-100	-100	-92.5926	-34.7836	-10.9919	0	-29.5166	168.7	-100	-100	-100	-21.4393	-100
Arctiini	Cosmosoma durca	-78.7613	-9.5442	27.4702	62.2867	-83.8101	NA	274.91	-25.8232	-81.4452	-15.4369	35.2185	-67.138	-85.9554	NA	274.91	28.7695	-85.1613	-22.0851	21.7616	-72.5012	-74.0847	NA	274.91	74.6967	-68.7957	53.5529
Arctiini	Cosmosoma elegans	-78.3399	-57.6043	45.4154	64.6026	-69.1162	-97.2477	-100	88.2647	-83.0424	-71.5898	48.2241	-78.0083	-82.8649	-99.6942	-100	-93.633	-89.8824	-73.1891	34.7154	-76.7954	-62.8513	-100	-100	-96.5044	-80.6256	-95.5056
Arctiini	Cosmosoma leuconotum	-64.7887	-59.4657	11.8623	62.6392	-58.216	NA	-100	95.6922	-70.09	-65.7692	20.3286	-67.5876	-72.3318	NA	-100	-97.6997	-74.3545	-66.9171	16.2754	-70.9691	-30.5477	NA	-100	-94.3538	-70.0619	-99.9582
Arctiini	Cosmosoma pheres	-59.8666	-55.3263	11.2537	58.1473	-78.6257	-49.4881	-5.28674	72.5463	-61.0435	-53.2211	17.2507	-58.5938	-78.7016	-41.0986	-27.0609	-76.3898	-73.2444	-59.2842	12.4383	-69.2336	-68.1853	-43.3958	108.244	-48.4557	-67.5595	-74.2622
Arctiini	Cosmosoma plutonium	-100	-59.5927	9.85385	67.0699	-77.0998	-62.069	0	78.124	-99.2463	-62.0108	18.4631	-69.9597	-83.1676	-68.652	0	-84.4507	-100	-69.2969	20.3585	-81.6196	-86.5615	-99.0596	0	-86.9059	-74.5296	-84.7655
Arctiini	Cosmosoma rasera	-79.6787	-80.7027	24.3642	79.3954	-63.9226	-95.3846	-41.6667	81.6092	-86.747	-84.2722	33.0751	-88.4639	-66.9229	-98.4615	-20.8333	-79.3103	-94.2972	-80.5354	16.881	-81.4929	-14.7533	-100	137.5	-41.3793	-88.5256	-25.2874
Arctiini	Cosmosoma remotum	-67.3196	-45.7904	-67.226	62.0795	-71.94	NA	4.66755	77.9768	-76.6413	-57.9611	-69.4349	-72.2052	-82.2171	NA	3.47864	-76.2908	-77.403	-63.3162	-38.7329	-76.0449	-43.9569	NA	118.538	-42.0443	-75.6031	-78.2929
Arctiini	Cosmosoma restrictum	-59.2793	-54.4594	52.2075	61.4296	-75.4251	-92.3816	0	85.1852	-56.4897	-70.6625	56.8871	-73.1398	-83.6842	-94.5583	0	-89.7436	-75.494	-72.5265	40.3255	-77.4579	-73.0364	-98.3131	0	-81.1966	-73.4325	-86.4672
Arctiini	Cosmosoma subflamma	-58.8921	-26.1142	15.4228	54.6697	43.0565	-99.8315	-77.9612	57.8998	-70.2624	-46.0138	18.8445	-68.3371	14.0818	-99.6911	-81.3417	-59.4184	-30.0292	-27.1814	-11.1579	-46.1655	139.617	-99.9438	-71.4361	-0.452342	-64.3128	-62.7787
Arctiini	Cosmosoma telephus	-55.2972	-70.0311	43.0046	67.0877	-62.5475	-66.7686	-97.4433	74.5982	-55.4694	-79.1463	51.7983	-74.3685	-71.7681	-64.4563	-97.5596	-84.3304	-64.7717	-66.7852	11.788	-72.8083	-13.0228	-72.1192	-88.5822	-37.4107	-74.4056	-78.6607
Arctiini	Cosmosoma teuthras	-85.2329	-71.5236	60.3604	79.7921	-16.5603	-77.8654	-100	92.933	-88.6263	-79.7158	69.5095	-84.3242	-24.391	-79.8808	-99.9153	-91.747	-88.3688	-70.2237	36.4364	-84.2709	67.5464	-84.6127	-100	-80.2817	-86.4836	-92.8342
Arctiini	Cratoplastis catherinae	-55.2437	-30.6319	-20.467	49.1117	-62.6433	82.6159	-97.89	43.7026	-57.6496	-31.1813	-11.227	-50.7377	-63.3072	89.7351	-98.7852	-59.7876	-64.3122	-41.8613	-24.7268	-58.1451	-14.9065	59.9338	-95.9079	14.7193	-58.5065	-51.5933
Arctiini	Cresera annulata	-85.4676	-68.2814	11.6394	78.4955	99.0577	NA	-100	39.3657	-88.8795	-78.0539	17.8319	-82.2371	90.7342	NA	-100	-39.1791	-82.3083	-76.2848	14.1031	-83.5762	206.282	NA	-100	-20.3358	-83.8519	-60.0746
Arctiini	Cresera ilus	-46.1897	-56.9065	16.2671	51.4763	89.7115	NA	-100	99.725	-52.6884	-66.0671	24.5066	-54.1902	98.9113	NA	-100	-99.725	-61.2405	-68.5372	-4.70261	-66.218	175.231	NA	-100	-86.0678	-57.8159	-100
Arctiini	Ctenucha divisa	-71.0413	-45.5985	49.4	47.3832	69.0238	-73.7462	1965.05	-323.564	-74.8099	-48.626	54.7058	-54.1486	76.7871	-76.0258	1965.05	345.764	-88.8926	-58.7098	54.9805	-63.2627	121.445	-80.1862	1965.05	456.962	-64.7179	335.443
Arctiini	Ctenucha jonesi	-75.1099	-62.159	16.13	69.4357	-63.7395	-74.2705	0	64.819	-77.4846	-70.1661	28.5472	-74.2767	-79.2902	-82.1462	0	-78.5118	-83.3993	-61.121	19.6888	-71.6987	-45.5909	-76.4669	0	-46.039	-77.8001	-66.4389
Arctiini	Ctenucha mortia	-68.2089	-51.7628	33.2094	65.6608	13.4449	-60.6134	-100	95.2726	-76.7613	-56.0763	44.5327	-74.4843	-19.7624	-64.0839	-100	-95.4655	-70.5924	-52.0946	25.7732	-71.9251	65.7937	-86.898	-100	-96.8162	-74.0642	-97.3951
Arctiini	Ctenucha vittigera	-83.0907	-79.1649	11.2653	80.5328	-94.1421	-95.2028	-93.4783	95.0908	-86.6368	-83.9001	16.4947	-85.123	-96.4097	-96.9832	-96.087	-97.0054	-91.7507	-82.5226	34.116	-83.4836	-96.9766	-97.2799	-67.3913	-96.9072	-85.9016	-97.0545
Arctiini	Cyanopepla fastuosa	-86.4258	-76.3004	21.4026	82.4008	-67.9579	-80.2882	0	73.028	-90.2995	-79.4681	24.8526	-85.8816	-66.6253	-82.7104	0	-72.5668	-93.5547	-78.5686	-3.01091	-87.2479	-8.08801	-79.6408	0	-33.8104	-90.9239	-62.0865
Arctiini	Cyanopepla jucunda	-76.8073	-69.5933	17.5403	72.7557	-90.4331	-73.5908	-100	94.5685	-78.9573	-78.4292	26.5573	-80.51	-92.9528	-78.4491	-100	-96.1979	-89.2771	-69.3969	23.4894	-75.3838	-93.6614	-82.6845	-100	-98.1593	-81.3167	-97.8274
Arctiini	Cyanopepla oruba	-72.6106	-74.5172	36.137	69.5394	-39.156	-54.9901	0	40.9801	-76.8441	-84.5031	43.3366	-77.0059	-56.3788	-62.2604	0	-57.0712	-83.1623	-72.6802	23.8685	-76.263	-10.5496	-47.7198	0	-19.3131	-80.4235	-57.3027
Arctiini	Dasysphinx torquata	-69.306	-79.8343	25.4814	73.5457	-80.3774	-33.8176	-64.9222	74.5428	-80.1564	-87.9834	33.0031	-79.0859	-89.0252	-43.524	-70.6388	-86.5902	-78.0059	-77.9006	30.6308	-72.8532	-65.0314	-33.4158	-5.42136	-44.9982	-78.3934	-74.0409
Arctiini	Delphyre arpi	-35.0628	-57.7139	-30.7328	63.315	-9.82659	-99.2244	748.214	-95.8501	-40.6695	-63.3961	-21.1308	-63.6685	-10.7514	-99.0163	862.698	93.9759	-29.0377	-64.7506	-33.3333	-67.4391	163.815	-99.6595	1303.37	430.12	-64.8468	108.166
Arctiini	Delphyre brunnea	-56.9264	-77.3078	31.4464	75.3552	101.666	-90.5123	-100	88.9431	-53.2468	-83.5234	35.0659	-83.3539	63.0761	-93.9139	-100	-89.878	-74.1613	-81.9419	9.85956	-85.3305	183.509	-89.7951	-100	-88.2927	-81.748	-92.3984
Arctiini	Delphyre dizona	-53.52	-48.3768	24.1607	47.9786	105.824	-81.6082	270.666	-119.825	-59.3096	-56.3478	24.6512	-52.9132	116.398	-89.1075	270.666	121.88	-76.4066	-70.5217	34.5393	-70.3627	133.814	-88.8794	270.666	142.52	-57.4911	137.111
Arctiini	Delphyre hebes	-73.21	-48.5246	14.0574	65.5719	11.3395	NA	-66.6667	66.6667	-76.6693	-52.7869	15.227	-65.6852	3.30735	NA	-33.3333	-33.3333	-94.7707	-85.9016	18.1334	-92.0725	56.4848	NA	-83.3333	-83.3333	-71.9139	0
Arctiini	Delphyre pusilla	-62.8821	-57.1388	12.9439	61.9697	-78.3784	-51.7544	0	89.1933	-63.1997	-66.9332	19.8119	-68.5661	-79.4118	-54.5004	0	-89.8856	-78.0468	-65.8766	17.7082	-72.2515	-92.5278	-84.6301	0	-92.2336	-71.1985	-89.7953
Arctiini	Delphyre pyroperas	-49.5832	-58.3095	11.5085	57.5101	-82.1145	-6.48688	-45.9733	71.9523	-49.345	-70.4169	17.4855	-66.6151	-84.4992	-5.3207	-50.1265	-75.7079	-65.661	-64.0491	8.63754	-64.9737	-95.8665	-44.7886	-41.3751	-74.7839	-68.8758	-84.1133
Arctiini	Demolis albicostata	-49.3597	-50.4526	-0.389581	53.8814	4.42813	-30.9942	0	28.185	-56.461	-56.546	4.16296	-57.7934	-7.58789	-31.5528	0	-29.2408	-69.0338	-69.7075	5.0423	-69.6516	-3.60481	-44.104	0	-37.0681	-60.2995	-37.2862
Arctiini	Demolis albitegula	-80.6836	-33.9771	-4.20998	70.3212	29.5333	-91.5105	-98.3339	92.6561	-85.0778	-43.2406	5.76923	-74.6757	-6.03057	-94.3219	-98.1979	-93.2739	-88.3125	-56.6939	-11.9153	-83.6628	123.255	-97.6295	-96.6678	-88.6067	-77.8567	-95.0583
Arctiini	Desmidocnemis hypochryseis	-59.6086	-68.4557	43.7684	65.5842	-77.7388	NA	0	77.7388	-63.1703	-74.4485	53.7355	-71.8552	-85.5352	NA	0	-85.5352	-73.5812	-65.4593	42.4164	-69.9515	-77.2123	NA	0	-77.2123	-72.975	-78.4908
Arctiini	Diarhabdosia mandana	-45.7919	-39.8686	-21.2471	56.8021	1.63776	NA	0	0.770713	-66.1365	-52.4047	-13.2998	-65.7373	-38.1021	NA	0	-39.3545	-44.9304	-50.4336	-33.0662	-66.3755	78.1792	NA	0	76.975	-70.4736	-9.4894
Arctiini	Dinia eagrus	-48.4545	-49.9425	29.8377	49.2333	21.0671	-53.8055	24.207	36.8502	-46.2545	-58.9132	40.7173	-54.1678	-43.3896	-57.4074	-27.379	-70.6422	-58.7302	-58.8557	3.15969	-62.7823	100.706	-63.3293	119.616	10.3976	-57.4854	-49.6024
Arctiini	Diptilon halterata	-64.2019	-64.5749	16.2722	61.5787	-9.30693	-62.3915	0	41.0621	-72.1831	-74.224	19.2338	-69.8212	-34.6535	-66.552	0	-54.0002	-71.831	-73.1444	7.50143	-75.0981	64.2999	-70.7453	0	-24.5138	-69.6468	-50.9375
Arctiini	Diptilon telamonophorum	-53.8627	-50.8975	0.404714	53.0496	-23.9434	-54.0717	0	28.2904	-56.6762	-52.6432	6.23735	-54.6809	-25.9571	-62.1219	0	-31.9002	-71.793	-65.1094	7.60624	-70.0473	-42.5094	-89.2043	0	-47.2724	-59.4799	-37.538
Arctiini	Dycladia correbioides	-44.8155	-44.6294	1.81046	47.6736	-23.0061	-8.74172	-49.4233	46.1855	-59.0861	-60.8668	2.88426	-62.2724	-33.5192	-24.9007	-72.9986	-65.632	-61.0896	-60.7098	12.486	-65.644	-27.6074	-47.4172	-20.0814	-26.2902	-57.114	-53.0292
Arctiini	Dycladia lucetius	-63.955	-52.9731	5.86558	61.0558	-14.2051	-58.3483	552.669	-6.92308	-73.6045	-63.861	10.9251	-74.2986	-50.2051	-65.7319	586.892	-40.4682	-80.3981	-65.4358	4.6379	-75.4751	8.82051	-70.3885	549.294	31.5385	-73.4842	-14.4816
Arctiini	Dycladia melaena	-76.9039	-55.3664	9.14592	78.8196	-64.3768	-41.6091	0	45.5887	-82.834	-69.8372	17.7417	-77.9923	-55.4093	-38.5982	0	-41.0386	-92.5718	-69.7261	2.95695	-92.5538	-7.07528	-52.0237	0	-28.3432	-81.6327	-53.1956
Arctiini	Dysschema amphissa	-46.6012	-42.728	11.3496	45.6854	-57.7807	2191.43	-69.1301	54.8512	-54.6203	-50.3341	20.7026	-52.8513	-66.3539	1311.43	-72.6464	-66.4295	-54.8062	-49.7838	15.8385	-54.0349	-23.0346	2825.71	-54.0965	-23.771	-55.7564	-50.5175
Arctiini	Dysschema boisduvalii	-84.4878	-61.2717	19.5703	81.1371	-36.0163	-84.515	-95.6247	77.2748	-87.0386	-71.8339	19.9584	-87.0152	-30.4126	-90.8113	-97.048	-80.0462	-86.0639	-70.9932	-8.98129	-86.6056	23.4845	-88.8007	-96.2045	-54.873	-87.6174	-83.418
Arctiini	Dysschema fantasma	-64.1307	-53.3169	-1.69515	63.4578	-85.1001	-91.638	-100	94.9761	-67.3475	-60.5986	4.75735	-68.6219	-88.1625	-94.394	-100	-97.817	-77.7381	-58.5005	5.30417	-72.4951	-70.9953	-89.0698	-100	-98.8935	-73.8703	-99.1029
Arctiini	Dysschema hilarina	-75.4598	-60.9888	16.0394	65.3231	-95.5466	-78.9351	-98.8727	96.6738	-79.0517	-65.969	23.7199	-70.6393	-96.6093	-81.6207	-99.6925	-97.8029	-90.1437	-73.4753	29.7875	-78.0403	-96.0526	-90.9388	-100	-98.9319	-75.5733	-98.1996
Arctiini	Dysschema hypoxantha	-76.4476	-34.7125	-23.1854	64.2388	-97.3345	-99.1979	311.378	91.3924	-81.5336	-39.0207	-11.8239	-63.2335	-98.4523	-100	311.378	-94.6835	-81.1163	-53.3308	-23.0583	-73.451	-94.239	-100	311.378	-82.5316	-68.6295	-94.6835
Arctiini	Dysschema lucifer	-68.6954	-64.5082	38.0185	68.3031	-61.344	397.756	0	10.0392	-73.0666	-75.6038	44.1646	-78.8797	-72.5031	251.122	0	-34.9167	-68.0229	-59.223	10.5961	-69.4563	-9.37115	400	0	25.6121	-73.4102	-4.55436
Arctiini	Dysschema luctuosa	-87.927	-71.7383	21.1559	84.8602	-81.6775	-49.8418	-100	91.2148	-89.4022	-79.7261	30.9477	-88.5093	-86.3211	-59.2619	-100	-93.0336	-96.8168	-62.0008	24.1503	-80.3571	-81.2815	-53.181	-100	-89.9794	-90.4891	-92.3473
Arctiini	Dysschema marginata	-82.3557	-86.8247	30.215	85.8011	-89.4802	-88.239	0	92.2739	-85.0993	-90.7112	31.4759	-89.4457	-87.6507	-90.5328	0	-91.7016	-89.0255	-89.9728	19.743	-88.7244	-74.4283	-86.185	0	-82.0746	-90.7365	-90.7001
Arctiini	Dysschema neda	-66.6667	-54.5856	19.984	53.8707	-91.2754	NA	-100	-61.5385	-70.7788	-62.5789	28.1267	-62.6855	-92.3077	NA	-100	-18.4615	-84.1121	-65.3765	27.182	-67.5268	-93.3733	NA	-100	-100	-71.5232	-44.6154
Arctiini	Dysschema picta	-56.6299	-39.9627	7.68035	47.6281	-67.2467	-53.2646	-99.5706	85.3136	-58.1284	-46.7242	18.0288	-52.2288	-79.4609	-59.3471	-99.5519	-89.8121	-68.3913	-49.0557	-2.40901	-59.7139	-24.3944	-63.0928	-98.8611	-65.5464	-57.9499	-87.5364
Arctiini	Dysschema sacrifica	-62.8049	-40.4169	18.8635	54.5413	-73.8992	-94.9413	303.556	81.0563	-62.3532	-51.2458	27.683	-57.3465	-81.1621	-97.2668	303.556	-85.642	-74.5483	-58.3613	9.1497	-68.0156	-26.7817	-98.4896	303.556	-46.5844	-63.4399	-82.0999
Arctiini	Dysschema sp.6	-90.6134	-96.9803	6.55676	96.9803	-97.9302	-100	0	97.9302	-89.2658	-95.5865	6.87523	-95.5865	-98.6399	-100	0	-98.6399	-99.2565	-99.7677	6.5755	-99.7677	-98.9947	-100	0	-98.9947	-96.9803	-98.5216
Arctiini	Dysschema subapicalis	-49.7572	-57.5083	-54.4423	68.3703	-33.7874	-98.66	-100	78.1435	-57.6978	-72.4422	-45.348	-76.2777	-58.0779	-99.1	-100	-81.7643	-59.5544	-65.099	-45.8539	-77.3706	-7.64283	-99.8	-100	-67.1165	-74.8312	-82.9822
Arctiini	Dysschema trapeziata	-86.9396	-65.3217	9.08577	88.5187	-98.7469	-94.8436	0	98.7507	-89.0188	-69.5052	18.8074	-90.2205	-99.3317	-96.6686	0	-98.5334	-95.0942	-66.1712	18.9628	-91.6347	-99.5823	-82.3581	0	-99.2667	-90.7478	-98.9136
Arctiini	Dysschema tricolor	-44.1525	-47.9193	9.50495	45.9222	-35.8169	NA	-100	100	-46.7285	-47.8247	2.62706	-45.6483	-1.10712	NA	-100	-100	-73.7764	-73.3922	29.835	-72.7948	-50.0898	NA	-100	-100	-62.7811	-100
Arctiini	Echeta divisa	-67.8322	-79.9194	18.6446	61.2822	-79.3205	NA	-94.702	94.6607	-71.8531	-87.6613	19.387	-67.2533	-86.4336	NA	-90.6181	-90.6563	-73.9261	-83.2258	11.9631	-73.7901	-65.143	NA	-56.7329	-66.8521	-77.4984	-81.0901
Arctiini	Echeta juno	-81.4392	-80.4734	2.3999	82.2268	-94.829	-93.8393	-81.93	98.6339	-82.7792	-87.0414	10.5765	-87.8447	-96.3355	-96.5377	-87.235	-98.9071	-97.469	-73.5503	12.3975	-81.716	-97.1091	-96.5623	-76.0143	-99.3466	-90.9091	-99.0021
Arctiini	Echeta minerva	-90.4928	-73.9526	58.1031	78.317	-93.8657	-91.8485	-100	92.9431	-92.2029	-80.9107	60.6074	-82.926	-95.2546	-93.4286	-100	-94.2013	-97.6522	-59.4536	60.0892	-69.0642	-95.3318	-92.8267	-100	-94.4201	-82.8561	-93.8731
Arctiini	Elysius cingulata	-74.4261	-44.0011	24.5148	59.8345	-59.8148	-71.1946	-47.4915	79.7194	-77.1336	-60.9059	29.2223	-73.8457	-77.6235	-76.975	-57.6651	-86.0992	-90.4061	-62.9819	20.234	-77.0216	-50.7407	-75.4335	-37.6058	-73.8821	-77.929	-82.7128
Arctiini	Elysius conjunctus	-61.2515	-63.154	21.4656	68.1794	40.4505	19.0159	-51.6815	-75.2617	-65.0991	-68.8549	27.5914	-73.0325	-8.35289	49.7693	-58.7852	34.7288	-65.2934	-60.464	7.11302	-70.6191	129.282	32.0861	26.4585	229.496	-72.1406	67.745
Arctiini	Elysius conspersus	-59.5316	-69.5159	-9.14164	68.8154	27.7643	-62.9726	0	16.4171	-65.2535	-80.2572	16.0512	-75.2198	0.645682	-72.4495	0	-33.0444	-64.6902	-63.3888	12.9493	-74.4663	133.374	-67.8405	0	53.5592	-71.1176	-5.64749
Arctiini	Elysius meridionalis	-61.3687	-63.3717	9.49515	60.9493	-37.2704	-19.0774	-77.2575	31.2326	-86.0927	-70.7933	15.8253	-73.1951	-60.8613	-27.8686	-85.9532	-58.2521	-38.8521	-44.0819	9.49515	-44.3957	6.96643	-23.6136	10.7023	3.3078	-78.939	-33.1825
Arctiini	Elysius ordinaria	-90.2271	-63.1117	30.2232	70.8884	-94.5677	-82.4359	-100	94.5294	-90.6609	-72.9521	39.7024	-78.5034	-96.1521	-88.5629	-100	-96.0579	-99.209	-61.1702	50.0446	-69.9365	-96.8311	-82.9558	-100	-97.4256	-75.7271	-96.5406
Arctiini	Elysius pyrosticta	-65.8345	-53.1691	9.29222	60.3524	-77.0315	NA	-78.2829	69.4859	-68.691	-56.5468	18.6524	-62.4149	-83.6374	NA	-84.9228	-77.4185	-76.1134	-59.1695	11.4522	-68.1618	-54.8369	NA	-61.9754	-49.1432	-69.5234	-64.953
Arctiini	Emurena fernandezi	-49.1785	-19.2316	0.0858369	19.2316	27.9623	-42.7731	17.8922	-25.4654	-54.5637	-37.1677	-1.73581	-37.1677	30.4528	-61.8051	16.4012	25.4281	-78.2037	-61.7154	2.12685	-61.7154	91.5094	-77.5016	48.797	55.1378	-42.9975	26.0983
Arctiini	Emurena luridoides	-79.4872	-58.8626	1.36173	65.095	-54.4665	-53.5533	0	44.2146	-81.8681	-69.0547	1.89413	-76.0028	-38.047	-60.1984	0	-46.0878	-99.9084	-95.4948	7.33081	-95.6369	-9.80108	-64.8823	0	-29.7561	-84.9402	-60.9171
Arctiini	Epeiromulona hamata	-79.4872	-58.8626	1.36173	65.095	-54.4665	NA	0	54.4665	-81.8681	-69.0547	1.89413	-76.0028	-38.047	NA	0	-38.047	-99.9084	-95.4948	7.33081	-95.6369	-9.80108	NA	0	-9.80108	-84.9402	-36.7089
Arctiini	Ephestris melaxantha	-37.8378	-42.9796	3.14526	42.9796	-11.7424	-55.5853	-92.9188	72.167	-29.7297	-53.269	6.33891	-53.269	-13.7741	-56.1873	-89.1192	-62.1272	-14.8649	-78.671	6.19375	-78.671	103.444	-70.7692	-34.5423	-45.4274	-80.6002	-77.2366
Arctiini	Epidesma crameri	-43.617	-63.7647	3.02769	63.7647	11.2238	-96.1538	-50.3774	49.7442	-54.2553	-70.3529	3.2768	-70.3529	-15.7261	-99.0385	-54.8113	-51.6624	-81.383	-49.4118	4.05289	-49.4118	184.528	-100	85.0943	142.839	-77.6471	-16.624
Arctiini	Epidesma ursula	-30.4415	-30.6219	-23.925	32.7727	216.246	NA	48.4273	-75.6735	-39.194	-34.925	-25.7199	-40.7123	220.279	NA	49.4102	70.8399	-57.3152	-56.1632	-5.79882	-59.4361	253.185	NA	199.345	229.002	-43.8783	81.0618
Arctiini	Episcea extravagans	-90.3743	-82.9885	24.8472	80.2105	-96.419	-99.3348	-100	92.7022	-95.0089	-96.3218	24.8799	-93.0526	-96.419	-99.6674	-100	-94.0828	-100	-100	25.1092	-100	-97.969	-100	-100	-98.4221	-94.9474	-96.6469
Arctiini	Episcepsis endodasia	-66.0201	-55.5432	15.6941	68.5771	-80.9101	-81.5931	1995.25	64.1883	-68.549	-60.489	20.8019	-70.2965	-86.8632	-84.2944	1995.25	-68.588	-77.1667	-60.9614	16.316	-72.8632	-74.585	-92.4329	1995.25	-61.2551	-74.5328	-65.4502
Arctiini	Episcepsis lenaeus	-33.3333	-45.7846	18.0815	30.2037	168.077	-62.1448	18.5173	-30	-52.648	-46.7147	20.0582	-24.5902	172.907	-69.6657	14.6021	21.5951	-15.5763	-60.216	22.9323	-36.463	192.379	-72.1727	42.6508	48.2515	-45.3055	30.9816
Arctiini	Episcepsis thetis	-64.2706	-68.5342	4.94672	68.5342	6.65696	0.444444	-75	64.7668	-70.1433	-67.3062	5.52351	-67.3062	13.1267	-23.5556	400	-7.77202	-76.7442	-79.2402	7.42986	-79.2402	27.772	-80.4444	750	-59.5855	-62.9701	-69.4301
Arctiini	Ernassa sanguinolenta	-41.2202	-71.3808	4.49878	71.3808	308.224	-22.4989	-41.5033	-40.297	-44.3452	-80.2895	5.23227	-80.2895	280.676	-37.7797	-60.6209	-1.28713	151.042	-58.2405	6.30807	-58.2405	415.792	1.22415	32.8431	171.485	-72.9399	16.4356
Arctiini	Euagra azurea	11.7682	-32.5785	3.73815	36.8627	176.927	-76.3282	2074.76	-261.538	-1.95151	-39.5341	24.3068	-44.4207	109.921	-74.0962	2074.76	178.899	18.628	-22.3552	-18.954	-39.3939	307.029	-61.0185	2074.76	411.362	-40.8913	321.595
Arctiini	Eucereon apicalis	-64.3642	-59.2026	-5.61466	71.8963	-82.0094	-99.0544	0	80.0959	-65.9249	-73.3213	0.922959	-77.4079	-86.1314	-99.8818	0	-83.9329	-82.7457	-61.1511	0.6794	-80.8731	-77.8016	-100	0	-77.4181	-80.9823	-82.2142
Arctiini	Eucereon chalcodon	-61.8567	-60.4333	4.47894	61.8364	-31.3236	-94.5551	-94.887	84.1448	-61.0494	-68.7571	14.1112	-68.8307	-42.0631	-96.8393	-97.1032	-87.1055	-73.5957	-65.0323	2.48123	-72.0947	24.6821	-95.7238	-84.661	-69.0727	-70.8752	-89.4299
Arctiini	Eucereon confinis	-86.3652	-76.6552	0.575216	84.0311	-77.0388	-80.9122	0	71.9486	-90.4826	-85.3153	8.95336	-89.4139	-84.6397	-83.8851	0	-79.8429	-94.5326	-77.3768	12.3296	-84.5395	-82.8979	-77.5338	0	-67.2351	-89.9522	-73.1175
Arctiini	Eucereon discolor	-66.1485	-68.7197	12.5076	64.9386	-88.6104	NA	0	88.6104	-67.6598	-75.3639	20.0146	-72.8879	-91.9646	NA	0	-91.9646	-78.2815	-68.2344	12.1669	-68.894	-70.8809	NA	0	-70.8809	-75.4992	-87.7995
Arctiini	Eucereon dorsipuncta	-75.9914	-83.0496	43.4088	79.7101	-82.8458	NA	0	82.8458	-81.1897	-87.5177	50.8591	-85.0242	-88.4234	NA	0	-88.4234	-89.1211	-86.2411	34.2557	-87.3016	-79.2514	NA	0	-79.2514	-89.579	-82.7467
Arctiini	Eucereon ladas	-61.4076	-48.6719	27.7552	51.4778	-78.1392	-86.0877	-61.2449	82.4521	-69.2612	-60.7801	38.1897	-61.7241	-81.77	-90.5776	-80.5997	-88.5057	-70.4498	-47.619	35.0323	-57.5862	-38.1619	-91.1256	-40.5725	-68.2375	-59.2857	-84.751
Arctiini	Eucereon latifascia	-41.7694	-50.4202	40.0428	59.0118	-80.7692	NA	2600	100	-40.2949	-49.027	45.6687	-59.0824	-81.0628	NA	2450	-100	-63.4048	-70.6325	37.9599	-78.1176	-82.0904	NA	800	-100	-69.6	-100
Arctiini	Eucereon leucophaeum	-82.8764	-52.2001	23.8125	65.9029	-62.1768	-86.666	0	84.447	-84.5424	-59.9285	37.3545	-72.0508	-75.6144	-89.0066	0	-88.7608	-88.2539	-54.6348	28.2951	-70.1225	-49.601	-85.162	0	-80.0063	-75.8394	-84.0453
Arctiini	Eucereon maja	-68.5042	-42.6626	0.542512	68.5042	45.5674	-32.1106	423.977	-166.667	-79.2269	-51.3707	1.1206	-79.2269	52.6596	-33.5678	515.205	248.851	-81.479	-71.7076	1.20953	-81.479	50.7092	-78.1407	593.567	330.46	-62.8235	279.31
Arctiini	Eucereon marcatum	-50.9094	-64.6526	1.81574	56.3662	0	NA	25400	-25400	-46.8898	-69.5727	1.61973	-52.847	0	NA	43400	43400	-73.7905	-81.571	12.5142	-73.3887	0	NA	43000	43000	-70.1661	33000
Arctiini	Eucereon nubilosa	-80.0914	-58.4963	15.4147	63.5714	-90.7124	NA	0	90.7124	-82.58	-74.452	23.7503	-80.4464	-93.2218	NA	0	-93.2218	-94.9721	-64.412	19.3242	-73.4821	-94.9813	NA	0	-94.9813	-85.9821	-93.2218
Arctiini	Eucereon obscurum	-33.3021	-43.1193	2.76278	28.7631	29.1393	-2.44294	574.267	-94.0348	-40.7581	-50.7367	1.97162	-38.7787	30.9533	-7.91726	533.225	78.2104	-57.4949	-66.7223	4.87254	-56.4955	94.3265	-16.5835	533.55	92.7092	-47.2968	77.5476
Arctiini	Eucereon pallescens	-59.3437	-66.0184	13.068	61.0115	1.0211	NA	38.4043	-39.6561	-62.2151	-76.0962	15.8272	-61.4101	0.52757	NA	49.4681	48.4148	-78.1222	-82.8854	1.22109	-81.4898	17.1375	NA	164.84	162.225	-73.7917	55.3466
Arctiini	Eucereon pilatii	-71.2367	-64.3556	9.23316	66.1604	-32.7586	-71.1324	0	36.8107	-76.1277	-78.2626	7.12953	-75.9126	-18.7739	-77.8309	0	-23.845	-92.5241	-88.4584	9.52332	-88.1162	-10.9195	-98.8836	0	-18.9767	-82.4141	-28.1669
Arctiini	Eucereon plumbicollum	-7.66355	-53.7443	12.2546	38.2137	21.4126	135.185	0	-25.3102	-10.0312	-56.1649	14.0453	-44.051	-8.43074	104.416	0	-2.8536	-26.5421	-50.1891	14.6278	-49.1228	58.4183	181.624	0	61.5136	-37.6715	28.6849
Arctiini	Eucereon pometinum	-67.7042	-73.2237	41.6963	73.2237	0	-72.533	0	0	-71.535	-81.1216	41.3006	-81.1216	0	-79.5097	0	0	-70.5241	-77.5103	28.9144	-77.5103	0	-90.7605	0	0	-71.8438	0
Arctiini	Eucereon pseudarchias	-59.6712	-66.7335	-55.6628	77.4488	11.9476	-84.0153	1900.17	-137.337	-68.6099	-76.7535	-34.4451	-83.4961	-7.95026	-88.9226	1900.17	100.368	-50.5232	-55.6313	-67.8541	-70.0157	76.8599	-81.5058	1900.17	229.044	-83.4961	170.016
Arctiini	Eucereon punctatum	-38.3168	-43.6956	16.4971	44.2816	-9.45484	-48.5011	157.99	46.4721	-38.6799	-57.554	40.0592	-53.7527	-25.9886	-59.0407	252.062	-61.0627	-41.5182	-45.0966	-18.6425	-51.7513	15.6225	-27.9268	238.144	-4.18118	-51.1079	-55.7056
Arctiini	Eucereon quadricolor	-71.4382	-35.0512	14.8209	59.2684	-69.5727	-76.0327	-100	71.1372	-74.0041	-40.8771	23.9677	-60.1054	-79.3699	-80.2039	-100	-80.2951	-77.2113	-37.388	15.8737	-60.0744	-28.8735	-75	-100	-43.7934	-67.359	-74.349
Arctiini	Eucereon rosa	-70.2654	-52.8905	-1.97506	61.1053	-58.8097	-62.2037	-100	73.0325	-71.0462	-57.7255	6.29552	-64.2842	-72.5137	-68.0665	-100	-81.8724	-80.638	-55.6653	3.66621	-67.5878	-54.3853	-90.1871	-100	-80.8653	-66.7775	-79.9329
Arctiini	Eucereon scyton	-57.4336	-54.7839	17.2065	52.47	-6.35569	-64.7018	0	23.7335	-64.4248	-69.389	21.1921	-65.2082	-30.3596	-76.4219	0	-42.0498	-41.1504	-50.0745	20.4696	-51.1291	27.7162	-39.8483	0	-2.40117	-72.9358	-42.2987
Arctiini	Eucereon setosum	-43.7224	-52.5013	1.75223	61.9479	-60.898	1.52838	295.753	32.905	-44.4709	-54.8749	11.5472	-67.0782	-75.4286	-5.8952	295.753	-56.7233	-64.5798	-59.3925	-8.79622	-74.513	2.57143	-11.6691	295.753	35.9798	-73.1139	22.7168
Arctiini	Eucereon striatum	-65.222	-64.4686	8.90898	61.969	-87.5	-63.7647	0	71.344	-68.7034	-71.5542	13.5744	-69.2882	-90.998	-69.6898	0	-75.8918	-85.5417	-70.9853	12.0796	-73.5936	-93.2975	-76.9412	0	-81.6399	-73.6223	-75.9087
Arctiini	Eucereon sylvius	-20.572	-55.0361	6.30814	17.118	4.35026	-19.5322	18.4679	-17.6433	-26.4002	-66.4578	3.23691	-24.6527	5.69455	-12.3977	16.6211	14.3915	-32.3959	-69.8554	0.0892061	-34.7271	20.239	-67.8363	31.9083	24.8229	-36.7195	41.1462
Arctiini	Eucereon tarona	-70.2877	-67.303	18.3352	70.0456	211.159	-87.5321	0	-179.215	-70.6789	-81.302	30.4472	-82.3842	142.004	-84.5758	0	118.322	-75.1208	-57.2687	6.14356	-71.4503	236.385	-99.3573	0	211.894	-76.3478	169.861
Arctiini	Eucereon velutinum	-62.3774	-48.1826	19.2605	58.7589	65.057	-100	-100	99.756	-65.2293	-54.2708	44.6767	-58.0261	62.9345	-100	-100	-99.6514	-79.2151	-71.2176	25.0678	-80.49	116.53	-100	-100	-99.4772	-70.1626	-99.9651
Arctiini	Eucereon vestalis	-73.3474	-90.7254	22.058	70.8282	-98.7936	-92.8571	0	94.9053	-73.4796	-89.5337	22.6944	-69.908	-98.8367	-93.545	0	-95.8003	-92.9931	-99.3264	23.3308	-91.9325	-100	-100	0	-100	-87.9141	-98.9329
Arctiini	Eucereon xanthura	-47.741	-47.0286	56.2481	46.834	-65.3046	-83.8531	-100	90.4656	-47.8581	-51.4969	56.7486	-44.8483	-67.285	-90.7445	-100	-90.6874	-64.6921	-70.5094	42.8723	-70.7381	-54.7004	-71.328	-100	-73.8359	-58.0555	-96.2306
Arctiini	Euceriodes pallada	-70.1079	-64.5087	15.1312	67.6667	-100	-25.6569	0	26.5836	-75.077	-76.5318	18.0801	-73.6667	-100	-38.5111	0	-39.2775	-90.7935	-96.0694	17.7768	-91.875	-100	-37.9701	0	-38.7433	-77.4167	-58.5093
Arctiini	Euceriodes wernickei	-70.5859	-63.3886	1.56294	68.2824	38.2518	-25.8555	-100	88.7341	-78.9844	-73.0253	11.921	-75.8015	9.88787	-41.6984	-100	-89.0436	-79.2188	-70.0632	5.89656	-78.0534	83.4353	-19.7719	-100	-79.3253	-75.916	-92.6958
Arctiini	Euchaetes rizoma	-87.2288	-67.3247	16.8414	73.5672	-96.8427	-82.5231	-100	96.2388	-88.9071	-73.9959	26.3811	-80.5835	-97.7681	-82.724	-100	-97.9558	-95.5383	-54.5269	32.0205	-66.0993	-98.2036	-88.9916	-100	-97.7105	-81.2435	-97.22
Arctiini	Euchlaenidia transcisa	-77.0654	-58.6463	8.03887	73.5495	-66.8701	-67.8651	0	70.6479	-80.0294	-67.733	17.0369	-78.6263	-77.5356	-73.3201	0	-78.4103	-87.7023	-60.7557	8.29127	-77.8157	-54.2575	-75.7501	0	-62.9062	-78.5623	-70.6686
Arctiini	Euclera diversipennis	-71.0811	-33.4764	-10.6836	52.6597	150.591	1170.89	-20.9677	-140.556	-83.2924	-36.6614	-14.3128	-60.5052	143.399	1301.27	64.5161	147.778	-84.2998	-62.3447	15.2602	-71.6055	221.773	614.557	56.4516	200.556	-71.0469	85
Arctiini	Euclera rubricincta	-60.7318	-59.023	-7.63902	62.7342	0	NA	18900	-18900	-70.5489	-68.4287	1.08594	-71.4225	0	NA	54100	54100	-87.9518	-85.0893	23.4787	-87.0954	0	NA	54200	54200	-84.029	42900
Arctiini	Eudesmia ruficollis	-99.3362	-87.0426	49.2936	91.5483	-94.8984	NA	-100	96.6334	-99.469	-88.835	49.3982	-92.4954	-96.5045	NA	-100	-97.475	-100	-91.0754	49.8299	-95.1548	-97.7799	NA	-100	-99.9474	-97.5956	-97.9484
Arctiini	Eupseudosoma aberrans	-43.9344	-49.0769	-49.1156	55.3541	36.4274	-37.5	2053.85	-258.696	-50.9016	-63.3846	-34.7677	-46.0893	13.7885	98.6111	2476.92	366.304	-63.4221	-62.4615	-33.3817	-75.663	105.828	-94.4444	2417.31	268.478	-62.3028	55.4348
Arctiini	Eupseudosoma grandis	-66.5662	-76.5329	26.9136	68.2435	-3.83303	-67.1703	0	8.6084	-66.4018	-87.4338	37.4731	-74.7018	-22.6972	-79.9451	0	-26.5941	-76.4593	-75.3974	15.5088	-83.7927	38.4909	-60.8516	0	30.5701	-80.4196	2.1943
Arctiini	Eupseudosoma involuta	-48.1253	-46.6406	-26.5158	60.7896	33.2335	NA	-98.7236	86.9602	-63.8932	-47.8133	-4.95768	-69.7223	-6.43713	NA	-99.82	-91.4921	-51.6692	-52.9929	-31.3353	-66.8786	116.28	NA	-90.6726	-55.5793	-69.7223	-84.6943
Arctiini	Eurota herrichi	-61.7618	-56.1603	18.4091	56.709	-56.6212	-74.13	-51.9447	64.1115	-70.5956	-69.0766	21.4917	-67.9363	-82.6632	-77.6756	-71.8813	-84.5645	-79.6547	-73.5987	23.2593	-71.521	-78.6426	-98.6211	-40.3918	-81.1498	-66.9405	-68.676
Arctiini	Eurota histrio	-76.9506	-88.1341	7.82352	88.1341	-98.4854	-84.7363	0	87.6864	-75.9581	-91.5308	8.29998	-91.5308	-98.233	-88.9169	0	-90.9851	-95.6162	-97.962	7.30894	-97.962	-99.9639	-91.7228	0	-93.3348	-86.9112	-93.2671
Arctiini	Eurota picta	-89.6308	-74.9045	27.657	75.5624	-97.9444	-93.4909	0	94.7052	-89.6308	-79.1932	34.278	-80.5029	-98.9444	-91.2521	0	-93.5318	-97.1168	-78.4289	37.6374	-77.8562	-99.2222	-98.4245	0	-98.5117	-90.9131	-98.8266
Arctiini	Eurota schausi	-93.7864	-77.0885	22.7071	82.7637	-97.876	-45.8724	0	48.2916	-95.6634	-79.6526	27.2531	-81.8848	-98.9667	-45.6666	0	-48.2046	-99.3528	-82.5889	25.4915	-86.6699	-99.1963	-44.5461	0	-47.2252	-93.7012	-68.0305
Arctiini	Eurota stictibasis	-95.0856	-80.5156	26.6335	80.6986	-99.8678	-99.2126	-15.3509	99.8919	-91.2882	-75.2107	29.7961	-73.653	-99.4052	-100	-16.6667	-99.8919	-100	-99.058	30.3985	-98.8751	-100	-100	-85.77	-100	-95.2635	-100
Arctiini	Euryptidia univitta	-71.4831	-85.6209	65.4276	67.2164	-91.7182	NA	0	91.7182	-69.2843	-94.6405	65.5851	-67.2493	-93.6221	NA	0	-93.6221	-89.724	-95.2288	65.2859	-86.1148	-93.9553	NA	0	-93.9553	-85.2902	-93.3603
Arctiini	Euthyone purpurea	-98.3607	-90.5095	6.17993	90.0611	-99.0573	-98.3557	200	99.0363	-96.6302	-89.6538	6.05022	-89.165	-99.2748	-99.0865	300	-99.2587	-100	-95.0992	6.07801	-94.8676	-99.9275	-99.2083	-100	-99.9259	-97.9633	-99.3328
Arctiini	Euthyone simplex	-55.2017	-50.6586	34.8165	47.853	0	NA	21500	-21500	-54.3015	-62.5395	39.4906	-50.4494	0	NA	57000	57000	-80.1281	-79.1886	43.8801	-77.0721	0	NA	58400	58400	-57.6992	47000
Arctiini	Evius hippia	-48.817	-52.1765	15.7888	38.5527	14.7541	-22.4478	0	4.63445	-58.1362	-67.2033	18.3248	-43.676	-9.56284	-29.3794	0	-16.9269	-58.4983	-64.3411	16.5447	-49.1835	49.5628	-23.0278	0	-1.48699	-67.0509	-36.3073
Arctiini	Galethalea pica	-64.4121	-68.254	1.58189	75.4627	-89.2558	-70.3097	0	88.1822	-68.6157	-79.8095	9.4777	-83.0149	-92.348	-78.6885	0	-91.9573	-82.3009	-64.0317	8.93222	-73.9701	-93.8155	-88.3424	0	-91.1366	-84.3881	-91.0135
Arctiini	Glaucostola guttipalpis	-25.0378	-54.2757	-3.90596	54.2757	-11.6532	-75.7025	0	19.6747	-31.6912	-72.3386	-4.71409	-72.3386	-13.1274	-81.3223	0	-22.0832	-32.097	-43.8045	9.86898	-43.8045	107.16	-49.9174	0	90.6475	-19.9825	-50.1408
Arctiini	Gorgonidia garleppi	-44.2577	-53.3181	-1.47227	53.3181	2.81996	-77.9954	-26.5543	29.9308	-54.8319	-70.8238	2.74443	-70.8238	-34.8156	-86.6359	-44.4679	-58.4775	-12.2549	-54.0046	10.5346	-54.0046	55.0976	-91.9355	96.4173	-29.9308	-76.087	-48.7889
Arctiini	Graphea marmorea	-60.2992	-41.7635	8.49709	52.5659	-12.7351	-53.8236	0	28.6032	-69.0161	-46.9339	13.3822	-63.3813	-32.7568	-53.4201	0	-41.0839	-76.8412	-47.1944	17.5754	-60.1439	-12.1514	-78.929	0	-30.5351	-59.6403	-32.2277
Arctiini	Graphea paramarmorea	-51.4822	-45.5847	-8.47475	53.9683	5.77015	97.9237	0	-50.2534	-54.6019	-55.4654	0.0401647	-57.128	-33.0949	96.0164	0	42.8209	-59.8673	-46.611	-22.1107	-60.0949	98.7601	119.532	0	70.8108	-60.9108	44.7466
Arctiini	Gymnelia laennus	2.25118	-28.1367	34.7575	25.626	335.499	-61.3435	-84.316	45.6032	-5.15403	-45.1916	32.1771	-40.4637	322.599	-63.3765	-88.9452	-69.3769	-23.6374	-46.5815	36.5905	-46.1515	404.78	-57.749	-77.9364	-16.8361	-39.8145	-54.3526
Arctiini	Gymnelia xanthogastra	-54.1152	-50.3448	11.5917	53.6304	60.9909	-26.6764	0	-10.6416	-57.4417	-56.9715	19.2197	-57.9931	13.6674	-37.4496	0	-14.6792	-58.5734	-53.5532	9.58494	-55.1885	196.982	-38.8787	0	72.5509	-57.2452	15.0235
Arctiini	Haemaphlebiella strigata	-86.2729	-61.2227	3.20412	73.5156	243.377	828.649	-100	-42.735	-87.7189	-72.2805	11.6149	-79.9717	169.708	476.216	-100	-14.4444	-78.4318	-72.2206	7.83865	-77.3798	300.28	435.135	-100	1.02564	-79.9717	-3.67521
Arctiini	Halysidota cyclozonata	-67.2565	-58.0484	1.97113	61.4618	-82.7156	NA	0	82.7156	-71.2519	-73.7003	3.29599	-74.1841	-87.3489	NA	0	-87.3489	-75.1712	-49.8471	4.63162	-63.9633	-43.8759	NA	0	-43.8759	-73.0897	-80.7413
Arctiini	Halysidota interstriata	-58.9955	-67.4411	-0.80813	69.3786	14.2767	NA	-100	82.8966	-64.1244	-71.1843	11.571	-73.644	13.8029	NA	-100	-76.3793	-78.2089	-86.8667	11.926	-87.4934	34.9021	NA	-100	-98.7931	-75.3028	-83.8276
Arctiini	Halysidota pearsoni	-73.5294	-55.2707	45.0357	58.5115	-88.9049	NA	-100	-21.0526	-73.8938	-58.603	48.0399	-57.5991	-92.4691	NA	-100	52.6316	-87.4805	-71.7398	42.1124	-76.1049	-90.8594	NA	-100	-100	-67.5221	-100
Arctiini	Halysidota schausi	-52.7945	-52.4813	1.44148	52.4813	-7.05009	-35.2997	8600	35.3912	-55.2635	-57.6379	1.89329	-57.6379	-29.4249	-56.9501	9100	-63.8638	-64.5252	-60.8539	5.72289	-60.8539	24.5083	-45.1836	3700	-26.3438	-34.433	-48.6961
Arctiini	Halysidota striata	-96.0993	-94.9738	6.79277	93.0929	-100	-35.3024	-87.5463	89.2164	-98.0496	-99.8953	6.79277	-98.2348	-100	-60.443	-97.3314	-98.2157	-100	-100	6.79277	-100	-100	-11.744	-82.5056	-89.6819	-100	-94.1815
Arctiini	Halysidota tessellaris	-31.6446	-58.7234	-36.678	51.9685	123.182	-15.0378	0	-23.9634	-54.4053	-78.5816	-29.5563	-64.9606	80.2201	-15.063	0	13.81	-16.2261	-20.5674	-36.0637	-48.8976	209.006	-20.9068	0	54.5054	-64.8031	3.91773
Arctiini	Halysidota underwoodi	-59.0705	-60.0611	3.44452	57.3663	4.55568	NA	0	-4.55568	-64.2179	-71.3662	5.22128	-63.0178	6.07424	NA	0	6.07424	-81.4093	-82.3221	7.28145	-77.2016	20.5099	NA	0	20.5099	-71.3855	7.89276
Arctiini	Heliactinidia nigrilinea	-53.1015	-60.6284	6.55442	57.1087	-2.39093	-38.5	0	4.25483	-59.161	-68.5803	14.0229	-63.4655	-32.4131	-29.75	0	-33.8776	-59.1251	-66.3693	-5.14732	-67.8742	46.1425	-96.25	0	36.3615	-62.9187	-4.9908
Arctiini	Heliura hecale	-81.4563	-77.2139	-26.1055	84.2348	74.9863	-47.6598	-100	26.6344	-84.8248	-84.5368	-18.2196	-88.8665	34.899	-61.777	-100	-53.8015	-84.7907	-82.1185	-40.8036	-89.0391	119.115	-60.7496	-100	-29.7821	-90.42	-57.6755
Arctiini	Heliura subplena	-53.905	-44.7683	29.0152	48.3407	43.089	NA	2108.29	-30183.3	-59.0177	-55.2317	37.6017	-59.0489	4.27939	NA	2108.29	24650	-50.8857	-51.7556	6.25339	-55.7646	184.456	NA	2108.29	78866.7	-55.012	28633.3
Arctiini	Heliura suffusa	-60.7417	-63.8911	14.5118	62.056	16.19	NA	137.1	-271.845	-67.424	-67.1405	19.9814	-65.2664	18.8883	NA	206.591	311.65	-68.159	-72.5426	10.59	-71.1749	54.4792	NA	184.557	273.786	-66.5301	343.366
Arctiini	Hemihyalea diminuta	-86.3855	-81.2048	1.64131	86.0837	-94.4258	-74.8638	0	83.6066	-90.241	-80.7229	3.64223	-86.6995	-94.6273	-81.812	0	-87.605	-99.8795	-97.3494	2.25911	-98.6453	-79.315	-98.6376	0	-86.9252	-91.3793	-95.8417
Arctiini	Hemihyalea extincta	-93.5994	-85.8018	15.0911	89.0869	-97.9592	-94.0165	0	95.8436	-96.8373	-95.9142	18.5335	-94.5805	-98.2857	-94.0912	0	-95.6457	-100	-95.9142	22.1464	-97.0304	-99.2653	-87.6589	0	-91.5388	-96.4365	-97.8723
Arctiini	Homoeocera acuminata	-48.407	-44.7858	13.0868	49.1503	2.98147	-98.1651	0	-2.04951	-59.0699	-51.6572	16.0753	-54.8235	-27.5316	-99.5413	0	-28.1874	-53.5457	-43.2767	14.4105	-49.5948	46.6022	-99.5413	0	45.2755	-51.5817	2.07612
Arctiini	Hyalarctia sericea	-61.3363	-55.2331	-17.2655	58.8838	-79.0015	-73.0179	-100	93.4095	-66.0166	-59.5941	-12.9116	-63.4559	-87.5184	-72.2453	-100	-95.3495	-71.2227	-60.7179	-15.0435	-69.2158	-75.1542	-80.0483	-100	-96.1467	-66.2707	-95.1103
Arctiini	Hyalurga fenestrata	-55.9117	-49.5547	-18.1991	60.0805	-28.2747	-8.69408	-45.5691	50.75	-56.6696	-65.6627	3.42857	-66.8325	-52.5646	-18.7229	-46.5514	-71.6667	-64.4002	-55.9193	-45.645	-71.8076	20.9835	-23.8817	13.3034	-12.9583	-67.0457	-63.4167
Arctiini	Hyalurga peritta	-58.9621	-19.076	3.97165	19.076	32.0189	-28.985	19.0021	-25.6454	-61.5866	-44.8584	1.48025	-44.8584	34.2666	-49.1729	22.7273	22.031	-84.7599	-55.2906	7.67226	-55.2906	98.0284	-56.7669	77.0677	88.167	-30.5514	32.358
Arctiini	Hyalurga syma	-62.0345	-45.3634	22.9897	54.7013	131.383	20.4342	-99.1266	-0.200669	-62.1456	-50.8772	26.5078	-58.6167	105.575	3.2567	-100	9.43144	-63.4241	-47.6817	-6.4618	-61.5319	320.509	16.4751	-89.083	131.104	-62.9894	8.96321
Arctiini	Hyda basilutea	-43.1149	-28.5714	-0.281532	28.5714	223.486	73.1597	18.6913	-109.234	-66.4767	-59.127	0.45045	-59.127	234.006	60.1359	15.1603	102.355	-76.2583	-76.7196	2.99362	-76.7196	254.229	12.0045	48.688	122.669	-64.1534	104.294
Arctiini	Hyperandra appendiculata	-53.4156	-38.8041	-55.0981	55.4954	192.007	845.07	-95.8472	58.0817	-62.5718	-50.9542	-53.8387	-62.0729	123.801	573.239	-95.3401	-72.5873	-59.9598	-48.6959	-49.6973	-62.2722	397.632	1460.56	-86.7896	50.3256	-64.2654	-66.5483
Arctiini	Hypercompe brasiliensis	-86.6067	-56.9138	2.05879	73.988	86.824	NA	-98.9236	59.481	-88.4509	-61.7247	12.029	-78.2823	45.735	NA	-98.7039	-75.499	-74.8502	-45.2648	-6.35763	-58.6707	158.838	NA	-97.8032	7.08583	-73.8786	-65.1697
Arctiini	Hypercompe cunigunda	-63.2049	-67.4284	-3.1219	67.0787	-71.5322	135.537	-86.9662	65.6938	-68.3797	-73.9327	3.87399	-71.9101	-76.6393	162.948	-89.2372	-71.6334	-78.9079	-75.339	-20.42	-80.8146	-46.343	66.6667	-79.684	-34.1526	-75.3933	-70.8141
Arctiini	Hypercompe detecta	-63.6172	-73.7094	25.4861	60.4722	-87.5031	-75.6778	0	75.8805	-65.1219	-77.3333	27.3156	-61.4095	-91.0002	-79.277	0	-79.4497	-78.7692	-89.9829	26.7173	-77.4153	-93.2746	-84.9849	0	-85.1101	-75.3785	-79.5283
Arctiini	Hypercompe kinkelini	-92.9386	-62.1546	36.1653	58.0079	-91.5754	-75.7849	-100	94.431	-91.3571	-63.5468	44.2101	-58.5173	-94.1443	-78.5571	-100	-96.2989	-100	-66.9308	36.6308	-70.0905	-94.6354	-94.6226	-99.5799	-97.4057	-67.2043	-96.0913
Arctiini	Hypercompe magdalenae	-56.7014	-61.7509	5.84241	64.5897	-2.80767	-76.5247	0	21.1016	-56.0062	-70.2115	11.4302	-67.9684	-32.686	-81.4154	0	-44.8498	-64.9672	-55.9929	9.78922	-63.4489	41.4834	-85.7883	0	8.61946	-70.1624	-21.3698
Arctiini	Hypercompe mus	-63.9964	-65.6699	-4.08937	67.3729	-4.8172	-49.1972	0	15.5687	-71.9172	-73.8038	1.77309	-73.4746	-28.4731	-59.2807	0	-38.7297	-49.595	-47.6077	-12.4628	-58.2203	112.731	-29.8009	0	66.5879	-71.3559	-52.5258
Arctiini	Hypercompe sp.2	-80.0626	-81.7049	53.3826	78.4981	-97.1014	NA	0	97.1014	-82.4413	-88.4845	55.1308	-83.4573	-96.9082	NA	0	-96.9082	-91.7684	-94.317	42.2825	-91.4984	-95.8937	NA	0	-95.8937	-86.3974	-97.0531
Arctiini	Hyperthaema caroei	-52.381	-45.1114	8.9941	45.1114	6.76268	-43.1341	0	-1.3188	-83.3333	-57.8521	7.69717	-57.8521	13.2958	-81.5024	0	-1.70564	-98.8095	-74.2908	8.75158	-74.2908	27.9482	-58.5622	0	15.1046	-89.3364	3.7278
Arctiini	Hyperthaema signatus	-62.8803	-64.004	8.34341	64.687	-68.7485	-66.7526	-72.591	82.1653	-71.4563	-69.1271	14.474	-70.2087	-79.4796	-67.6068	-83.2976	-87.5562	-72.1036	-53.8591	12.2007	-59.0048	-60.0496	-59.033	23.1263	-45.867	-69.8876	-75.5166
Arctiini	Hypidalia enervis	-77.0021	-62.6986	26.504	69.211	-96.3092	-91.7059	-100	97.0739	-80.2424	-68.4489	35.6929	-76.6384	-97.1776	-94.508	-100	-98.2033	-89.0938	-63.5561	39.6438	-72.0894	-98.1763	-98.2515	-100	-98.6653	-78.2318	-98.46
Arctiini	Hypocrisias jonesi	-71.5512	-79.0301	7.32389	73.4946	-52.2914	-64.6003	0	53.024	-76.6997	-85.9764	6.68529	-80.8602	-72.5323	-75.0408	0	-72.6538	-84.0924	-73.5911	3.98124	-75.3226	-30.376	-10.2773	0	-26.8248	-84.086	-72.2888
Arctiini	Hypocrita bicolora	-50.2604	-33.3574	13.0162	44.4892	-7.62891	-61.9546	0	40.0636	-54.6525	-36.5056	25.0299	-48.6845	-39.5573	-65.2032	0	-50.2567	-61.5803	-40.9757	17.1305	-53.2591	16.3409	-70.1509	0	-34.6003	-50.4622	-42.7768
Arctiini	Hyponerita pinon	-78.9168	-66.8263	17.0059	80.4861	62.0762	-83.9776	0	44.7275	-84.5261	-79.446	15.3622	-88.8492	34.079	-89.2498	0	-57.9763	-61.5087	-62.5171	8.29435	-75.8756	149.633	-82.5823	0	-22.7433	-88.8134	-40.9006
Arctiini	Ichoria chalcomedusa	-81.504	-38.4095	3.09045	69.6885	11.8448	-78.3385	-100	67.1807	-83.8919	-43.9132	10.0369	-73.8776	-5.68328	-84.4961	-100	-74.397	-86.9292	-53.7547	8.25064	-81.6756	33.8054	-82.4338	-100	-76.7102	-78.5607	-81.2772
Arctiini	Ichoria tricincta	-64.0296	-47.516	5.0408	55.2791	-84.2433	NA	-99.0991	-138.312	-65.3983	-54.6946	14.0695	-59.7442	-90.3594	NA	-99.3994	29.2208	-76.7588	-51.2955	11.095	-63.5814	-71.4236	NA	-99.6997	172.078	-66.7674	33.1169
Arctiini	Idalus admirabilis	-30.6667	-59.7138	-62.1457	66.4315	103.238	-67.5614	37.151	-21.2977	-51.619	-72.1162	-56.1373	-74.8383	61.1874	-77.5557	40.0379	21.4504	98.8571	-54.1631	-69.2662	-49.9706	247.301	-62.707	139.612	192.824	-73.3686	8.85496
Arctiini	Idalus agastus	-68.7663	-58.5737	14.4783	59.7688	-73.2614	-31.917	0	45.3447	-76.349	-64.8494	24.3224	-64.5087	-84.1727	-48.609	0	-61.8313	-77.1916	-48.9382	22.539	-57.1965	-45.2638	-33.3839	0	-32.2531	-63.237	-44.4702
Arctiini	Idalus carinosa	-48.9514	-49.5164	-15.2295	44.8221	-49.4903	-81.1893	-25.6158	66.6667	-55.1918	-62.5372	-14.5283	-52.0158	-49.7961	-87.2349	-23.3169	-66.544	-58.0563	-45.6101	-14.0681	-57.0356	11.7227	-79.0287	51.1002	-21.7996	-53.0435	-70.5521
Arctiini	Idalus critheis	-66.6338	-57.9436	0.201295	57.9436	0	-55.5625	-53.3815	49.7248	-65.7464	-62.8141	0.236303	-62.8141	0	-62.5	-42.0973	-45.377	-81.9759	-73.2509	0.122528	-73.2509	0	-66.25	5.0152	-13.071	-67.2594	-54.7606
Arctiini	Idalus dares	-24.8367	-52.3154	1.67924	52.3154	97.2175	27.2585	47.2416	-93.6658	-35.1967	-56.5081	1.80496	-56.5081	94.1944	27.3031	46.8611	90.6334	-37.7032	-55.194	2.02047	-55.194	167.743	27.292	193.659	166.577	-32.2591	115.667
Arctiini	Idalus felderi	-46.5272	-50.4401	16.3188	50.4401	25.5341	-52.0174	12.2174	-6.78057	-52.242	-57.0074	18.7291	-57.0074	27.9118	-78.735	1.93757	0.480513	-58.7304	-56.2627	21.0818	-56.2627	78.2564	-74.0458	178.364	141.805	-25.3216	61.1319
Arctiini	Idalus flavicostalis	-89.5039	-80.6883	39.6248	82.9161	22.3894	-100	0	16.439	-88.9702	-86.2606	48.3002	-87.6903	0.185228	-99.942	0	-33.4008	-87.3295	-66.7031	40.5067	-75.4581	54.3644	-99.942	0	8.76749	-87.0194	-22.7618
Arctiini	Idalus herois	-95.1894	-52.0202	-20.0513	82.9833	319.29	-37.2498	-95.4298	22.532	-95.4915	-74.1162	-12.174	-89.8394	235.901	-35.1443	-93.6888	-57.7242	-79.6189	-38.6995	-16.4707	-72.1433	516.142	-18.274	-87.8128	99.6232	-85.8555	-35.1168
Arctiini	Idalus idalia	-68.0739	-52.5333	6.86535	52.5333	-21.2575	-19.6185	-46.5457	44.2248	-74.0106	-68	4.45982	-68	-35.2295	-28.5916	-55.9719	-57.0723	-19.4591	-87.8667	9.33475	-87.8667	201.597	-37.0349	24.8829	72.761	-71.2	-31.8715
Arctiini	Idalus lineosus	-91.8278	-62.6861	20.5957	74.6999	-75.5489	NA	-100	92.3124	-93.5538	-76.7007	23.5868	-84.8569	-80.2728	NA	-100	-90.4674	-90.8505	-69.6058	4.00507	-79.8476	-39.521	NA	-100	-67.4047	-87.0499	-91.7589
Arctiini	Idalus metacrinis	9.6541	-28.5293	-0.843195	35.4874	33.2499	-40.9655	-68	14.5581	-20.8054	-32.4643	8.22485	-39.4304	-13.888	-66	-76	-62.565	25.3485	1.2789	3.16568	3.55969	99.5934	-17.3103	-84	74.0035	-14.5126	-49.5667
Arctiini	Idalus sp.1	-72.0832	-58.5983	33.236	62.0213	-91.3783	NA	0	91.3783	-74.1631	-64.198	42.8424	-71.4978	-93.6158	NA	0	-93.6158	-87.0653	-69.3822	41.4161	-75.5696	-95.2864	NA	0	-95.2864	-76.6117	-93.6158
Arctiini	Idalus vitrea	-83.4427	-44.3453	-14.215	77.8843	49.3088	-50.9047	-100	59.4055	-89.132	-54.4759	5.81593	-86.9365	-1.09447	-55.309	-100	-76.5879	-63.3115	-49.4106	-45.8933	-81.3987	186.233	-53.141	-100	-13.07	-85.9425	-62.0114
Arctiini	Ilipa tengyra	-59.1153	-58.9187	30.0415	60.821	-70.9129	-74.8421	-99.618	66.6271	-60.563	-74.8069	36.1826	-72.2306	-82.4066	-80.7368	-99.2359	-79.0974	-74.1019	-70.0625	12.8216	-75.1283	-37.0539	-96.3158	-99.4269	-35.1544	-68.1859	-79.0974
Arctiini	Illice blanda	-81.0147	-75.1261	20.3282	70.0896	-97.1171	-84.9904	-96.9745	96.8845	-93.5352	-80.0372	26.9414	-76.8857	-97.5676	-89.3521	-95.4618	-96.9456	-98.8543	-87.0188	30.9995	-82.1135	-98.2883	-98.5247	-98.328	-98.9615	-89.9925	-97.8009
Arctiini	Illice cryptopyra	-81.0223	-60.1414	5.50987	68.461	-87.037	-97.5452	0	87.037	-81.0729	-65.0595	5.48931	-69.5087	-90.6686	-98.3204	0	-90.6686	-98.1275	-71.6811	4.03988	-79.841	-93.0014	-100	0	-93.0014	-81.828	-90.6686
Arctiini	Isanthrene incendiaria	-41.8635	-51.9519	32.3199	51.507	-3.02045	NA	-29.7512	43.7805	-42.9798	-58.6096	43.2304	-50.8038	-32.8299	NA	-29.7151	-50.9146	-44.8261	-57.8075	23.0087	-50.5023	40.7063	NA	77.0646	111.646	-51.2391	-27.6829
Arctiini	Isanthrene pertexta	-64.0143	-65.8273	2.95721	64.0143	-38.3364	-61.6126	0	38.5934	-65.3459	-73.4412	3.22521	-65.3459	-56.9142	-72.3926	0	-56.1382	-77.7525	-61.211	3.37307	-77.7525	-8.71162	-11.6564	0	-11.6799	-72.3287	-46.7445
Arctiini	Isanthrene ustrina	-80	-65.1123	-0.521346	65.1123	-63.6927	-22.555	0	21.282	-80.6349	-74.4387	-0.993508	-74.4387	-46.0401	-22.8198	0	-21.5816	-100	-96.7185	-9.61047	-96.7185	27.1469	-30.0977	0	-23.915	-89.2919	-33.984
Arctiini	Ischnocampa lithosioides	-40.7542	-36.3722	-6.52457	42.3068	0	NA	-53.8462	53.8462	-39.5531	-36.6547	-11.6824	-41.8563	0	NA	-76.9231	-76.9231	-54.3296	-48.9546	-7.41946	-49.7635	0	NA	56.4103	56.4103	-41.2931	-76.9231
Arctiini	Ischnocampa lugubris	-78.0838	-73.0931	34.3891	74.1024	-45.7039	-86.9188	-100	89.6897	-81.6367	-82.2154	43.4813	-81.8946	-61.4361	-88.5028	-100	-90.7908	-85.9082	-65.2741	20.3903	-82.2002	10.2461	-90.9215	-100	-80.1301	-81.6272	-91.0911
Arctiini	Ischnocampa styx	-88.8448	-92.0588	0.438955	91.4079	-88.1579	-87.6463	0	96.2925	-92.2424	-95.2941	5.16537	-95.0311	-82.0366	-94.285	0	-96.7234	-99.8867	-99.7059	6.85994	-99.8447	-79.6911	-90.7994	0	-97.9819	-95.6004	-97.0748
Arctiini	Ischnognatha semiopalina	-28.2822	-43.6364	-59.1045	59.116	132.836	-27.9735	0	-15.5136	-52.5767	-77.3206	-43.1479	-69.9586	88.317	-42.0903	0	-0.436758	-23.9877	-22.1053	-58.7788	-62.8453	284.972	-29.6288	0	45.5625	-67.4724	-3.72117
Arctiini	Isia alcumena	-81.7783	-74.2671	49.833	78.2535	-95.2258	-77.748	0	89.4397	-84.9982	-86.8621	47.8635	-85.9718	-94.6452	-94.3029	0	-94.0613	-93.4504	-91.5309	44.0127	-88.6761	-89.3871	-88.807	0	-88.1226	-90.8169	-94.5642
Arctiini	Isia intricata	-71.5293	-50	20.6739	66.1704	-93.6007	-91.2631	-100	96.275	-73.6865	-53.1171	28.0731	-65.731	-95.165	-89.7436	-100	-97.257	-85.3481	-56.7917	30.1219	-76.617	-94.3117	-89.5062	-100	-97.3586	-74.5179	-97.1893
Arctiini	Ixylasia semivitreata	-51.1242	-57.6079	16.3325	57.6079	-24.0202	-35.4697	0	33.6243	-54.42	-65.643	20.9537	-65.643	-45.0063	-30.7156	0	-41.6879	-61.1523	-60.0323	14.3504	-60.0323	23.9949	-47.9961	0	-30.8718	-45.0242	-36.2435
Arctiini	Ixylasia trogonoides	-69.6864	-69.424	19.6529	71.4445	-9.4401	NA	0	9.4401	-82.8107	-76.4206	21.6842	-82.6548	-25.9766	NA	0	-25.9766	-81.8815	-68.6123	17.9715	-66.2019	15.6413	NA	0	15.6413	-86.5031	-3.51562
Arctiini	Lamprostola pascuala	-63.8048	-62.6456	18.378	61.7483	-69.6698	-47.4564	0	58.4298	-62.7857	-68.03	19.4502	-65.1726	-80.5989	-48.0296	0	-63.408	-81.9951	-75.6148	13.1684	-77.6169	-62.7592	-75.5911	0	-64.8519	-71.2138	-61.9492
Arctiini	Lepidokirbyia vittipes	-53.0314	-26.2302	-11.247	60.8222	122.817	-40.5822	-100	60.5222	-59.1177	-47.0809	0.159532	-66.2878	93.4272	-38.5616	-100	-76.0285	-67.4923	-41.618	-36.2802	-71.4389	197.214	-42.3973	-100	-12.8165	-69.3833	-59.8892
Arctiini	Lepidoneiva erubescens	-81.4123	-71.4112	14.9236	78.7259	-45.7612	108.721	-89.5539	43.0245	-86.6071	-83.7388	21.5226	-87.027	-66.4447	87.2065	-91.7283	-61.7146	-92.086	-82.3195	4.40442	-88.5328	-18.8637	25.8745	-55.9964	-8.6262	-89.112	-51.7572
Arctiini	Lepidozikania cinerascens	-65.3001	-70.5267	18.2432	78.6862	-48.7491	-75.0229	0	47.9679	-65.4691	-81.5487	31.4414	-87.5262	-56.2168	-80.6718	0	-57.4762	-60.5664	-57.691	9.44444	-71.9078	6.21683	-80.2748	0	-15.3287	-82.949	-38.56
Arctiini	Lepidozikania similis	-64.5801	-52.5782	0.577774	52.5782	-26.2016	-88.2353	0	51.8868	-63.7781	-60.8622	1.72429	-60.8622	-10.0775	-84.1176	0	-42.5427	-61.2163	-77.6839	1.94096	-77.6839	151.473	-44.7059	0	53.2345	-61.5385	-26.7296
Arctiini	Leucanopsis acuta	-67.0702	-44.9204	4.59094	54.0349	-19.8085	NA	-69.3046	18.1329	-72.6392	-53.5456	7.28664	-59.7328	-41.0533	NA	-75.3337	-41.2328	-76.6478	-42.026	5.17952	-56.4885	2.693	NA	-74.1209	-11.0413	-57.8244	-22.2322
Arctiini	Leucanopsis athor	-83.097	-80.2686	20.963	83.1193	-93.3257	-89.994	0	91.8174	-87.5253	-83.2645	25.5499	-86.533	-92.7503	-94.6075	0	-92.2627	-88.712	-82.3003	21.5129	-85.2803	-86.9965	-95.5662	0	-94.0718	-89.1951	-94.3501
Arctiini	Leucanopsis bactris	-71.0518	-67.0144	34.8342	64.395	-90.3808	-100	582.979	100	-71.4858	-68.7266	37.2809	-66.6185	-92.835	-100	682.979	-100	-88.3806	-78.1434	25.7031	-79.1221	-94.7532	-100	710.638	-100	-75.6858	-100
Arctiini	Leucanopsis biedala	-60.4697	-56.519	45.9064	56.1883	0	NA	378.443	-378.443	-61.2306	-60.3797	47.8764	-60.237	0	NA	474.85	474.85	-80.2514	-76.7405	44.2075	-77.7485	0	NA	563.473	563.473	-70.079	479.641
Arctiini	Leucanopsis dallipa	-90.6537	-85.2256	43.8791	83.4486	-96.8919	-50.9483	-59.0481	91.0848	-93.6791	-91.5716	44.0831	-90.0692	-97.4324	-70.896	-75.6502	-94.6351	-100	-87.2583	46.1489	-87.3024	-98.3446	-6.34402	-37.1057	-77.9487	-94.0711	-92.6233
Arctiini	Leucanopsis fuscosa	-82.2195	-63.3366	43.2221	70.5953	-92.5956	-98.287	-100	96.9314	-84.7294	-76.5511	47.2902	-81.397	-94.004	-98.7234	-100	-96.9314	-93.5591	-62.0664	40.0189	-67.5228	-91.0262	-97.1304	-100	-97.8339	-83.1013	-97.2473
Arctiini	Leucanopsis huaco	-80.2824	-84.6395	2.15343	84.6395	-96.4676	10.1307	-100	100	-79.7277	-90.3866	2.57515	-90.3866	-96.6602	90.8497	-100	-100	-93.3434	-85.162	2.03679	-85.162	-94.605	63.3987	-100	-100	-90.1776	-100
Arctiini	Leucanopsis jonesi	-88.0799	-89.4243	13.5652	85.8639	-98.0827	-43.7602	0	45.0984	-89.7573	-90.661	13.4958	-87.8599	-98.4422	-39.194	0	-40.6409	-98.7152	-89.1684	13.5652	-91.4594	-98.9215	-48.895	0	-50.0476	-93.7827	-85.7709
Arctiini	Leucanopsis leucanina	-71.8262	-46.9059	26.5033	60.9035	-93.5673	-62.761	0	89.7362	-73.5586	-50.6622	36.0794	-63.3455	-95.0942	-69.4896	0	-92.5032	-88.1568	-57.3802	44.4726	-71.2088	-94.6719	-96.1717	0	-93.6615	-67.9853	-92.4389
Arctiini	Leucanopsis lineata	-84.7186	-74.4171	11.3422	74.1063	-100	-81.1146	0	89.3263	-77.0263	-71.0492	11.3811	-65.5556	-99.5205	-90.6347	0	-94.4007	-98.8642	-94.7539	11.3908	-95.942	-100	-90.4025	0	-94.5757	-91.401	-99.9125
Arctiini	Leucanopsis mandus	-69.8612	-32.1625	35.3922	44.6861	-93.301	-99.3148	1626.05	89.7331	-69.8392	-47.8595	37.3145	-55.0936	-93.1247	-99.0435	1626.05	-88.9117	-81.009	-53.2748	36	-65.8866	-90.7448	-99.7716	1626.05	-82.5462	-66.4648	-89.271
Arctiini	Leucanopsis oruba	-63.8377	-52.2422	-0.54784	60.5197	-54.552	NA	-96.7989	70.4318	-67.5223	-52.6519	1.43967	-61.5465	-65.884	NA	-99.8792	-75.3555	-76.8578	-58.616	5.27456	-68.9438	-44.3939	NA	-100	-59.6893	-69.6144	-69.326
Arctiini	Leucanopsis perirrorata	-51.2036	-50.4371	5.84448	48.7749	-24.8725	-98.1308	-66.6667	100	-47.918	-43.8805	6.95101	-43.6979	-24.9453	-88.785	-72.2222	-100	-65.81	-61.7533	3.87285	-61.3539	-41.0007	-93.4579	72.2222	633.333	-59.2574	-100
Arctiini	Leucanopsis pseudomanda	-74.732	-85.7238	35.7627	68.2921	-96.3295	-95.1183	0	96.3995	-76.1294	-89.0438	35.9767	-70.9961	-97.1053	-94.8225	0	-97.1254	-87.6723	-88.2802	36.262	-82.0199	-98.0603	-99.4083	0	-98.0546	-81.5577	-97.2416
Arctiini	Leucanopsis pulverea	-56.7424	-63.9919	34.5367	72.9052	-91.8605	-80.1681	0	96.5382	-54.2229	-74.1344	37.2119	-78.6218	-93.5216	-79.4477	0	-97.0865	-80.3052	-82.444	49.3795	-86.805	-95.7475	-92.0552	0	-98.4336	-87.7839	-97.2118
Arctiini	Leucanopsis rhomboidea	-27.6728	-56.6278	-53.1134	55.6546	71.3507	-78.8337	0	-45.4329	-32.3338	-69.4062	-39.9693	-60.8175	40.0237	-86.1771	0	18.8046	-19.5241	-49.894	-64.2951	-68.992	115.924	-96.9762	0	80.9373	-65.2735	55.56
Arctiini	Leucanopsis sablona	-76.6161	-72.7788	23.5725	72.9657	-96.1107	-36.1503	0	39.1052	-78.0128	-82.6195	27.5072	-82.9186	-96.7838	-39.4475	0	-42.2767	-92.099	-70.4779	26.2836	-73.302	-96.6717	-38.393	0	-40.7759	-86.1802	-66.1475
Arctiini	Leucanopsis sp.18	-51.8122	-15.9583	7.57356	13.7733	13.5779	-29.7389	71.4286	-6.65602	-69.3575	-45.9904	7.49068	-45.2613	-6.54312	-6.13577	114.286	19.5953	-42.6689	-29.3905	8.73394	-24.225	44.8941	-32.0627	571.429	29.9787	-56.2002	12.6731
Arctiini	Leucanopsis squalida	-84.1463	-34.7826	-4.95131	60.6838	30.8985	-100	0	-17.6011	-89.9024	-37.747	-3.33388	-79.9283	16.5567	-100	0	5.09136	-90.7317	-48.004	0.462122	-71.271	38.7842	-100	0	23.7389	-80.2867	8.26175
Arctiini	Leucanopsis strigulosa	-68.4455	-69.6106	2.14387	69.4597	-86.0178	-74.5813	0	83.062	-73.7355	-76.5749	2.86527	-76.383	-89.4448	-90.936	0	-89.0377	-82.8306	-69.4207	3.55619	-73.9566	-92.1179	-70.7389	0	-87.8426	-77.2566	-87.9868
Arctiini	Leucanopsis terola	-82.0095	-64.6061	45.4657	69.4246	-89.2252	-82.8767	0	87.611	-81.7379	-76.0249	48.9954	-78.1503	-91.6868	-90.1826	0	-91.0412	-96.1643	-73.1917	45.8051	-77.4132	-93.866	-100	0	-93.5432	-81.7404	-91.0412
Arctiini	Leucanopsis umbrosa	-40.5033	-47.1793	10.6922	45.0161	40.3528	-44.7184	0	32.8427	-55.8789	-59.9691	19.0482	-60.0482	-27.6736	-47.2291	0	-42.8511	-48.7613	-58.5781	24.4129	-51.8489	147.96	-34.6754	0	-18.3137	-48.6736	-36.7115
Arctiini	Leucotmemis felderi	-62.0785	-65.4194	-15.4008	67.5308	-32.2856	-31.957	0	29.9193	-53.2891	-54.9677	-17.8407	-55.2171	-30.3772	-26.9889	0	-29.9358	-91.2659	-85.0323	-17.0143	-92.0285	-48.3835	-63.0077	0	-47.456	-76.4096	-41.3305
Arctiini	Leucotmemis nexa	-63.9898	-64.1019	3.27037	64.9427	0.48913	-17.4433	-100	62.828	-68.641	-75.2454	4.87736	-69.4952	-8.80435	-15.5052	-100	-56.7055	-73.0015	-75.6699	-39.2726	-79.9938	11.5761	-27.7113	-100	-48.105	-73.0567	-74.9271
Arctiini	Lomuna nigripuncta	-81.9118	-54.6611	-4.3956	83.9295	-79.403	-33.9213	-27.7915	69.3952	-85.1471	-74.4895	6.39948	-83.6092	-63.5821	-41.0448	-26.8281	-59.7177	-100	-71.7668	-5.44279	-81.1532	-37.1144	-48.4396	31.6206	-36.6129	-89.6423	-61.129
Arctiini	Lophocampa arpi	-68.7136	-63.0094	3.76922	69.8547	-82.5363	-52.0443	0	55.8314	-73.9819	-68.3734	5.06417	-74.4552	-88.3396	-59.4378	0	-64.2886	-80.6723	-52.5949	2.03492	-67.2215	-83.0199	-58.2112	0	-62.8291	-76.6041	-60.8239
Arctiini	Lophocampa atrimaculata	-80.5245	-74.2314	12.8261	79.2634	25.7448	NA	0	-22.9947	-86.9649	-84.9396	22.9558	-88.5866	-0.248281	NA	0	-0.725745	-78.9819	-74.3696	7.05437	-83.4439	49.9809	NA	0	44.6524	-90.8427	20.4927
Arctiini	Lophocampa citrina	-68.7133	-41.5953	-16.2082	50.545	164.262	-79.5055	0	-29.6304	-73.6546	-39.973	-32.1004	-53.7915	138.607	-85.989	-0.0174505	6.09466	-81.1399	-55.4529	15.2974	-63.673	191.612	-80.989	-0.122153	32.44	-61.7062	23.0819
Arctiini	Lophocampa modesta	-42.1765	-28.6851	-13.9411	45.3669	-34.8418	NA	45.2333	-53.9224	-40.631	-34.4158	-8.25404	-47.8458	-43.036	NA	45.098	42.9397	-65.5194	-56.447	-72.6267	-74.1295	-20.9359	NA	195.808	62.6755	-56.384	19.0751
Arctiini	Lophocampa romoloa	-84.3534	-79.5745	65.097	80.292	-92.5788	-55.5741	0	83.9409	-87.9741	-88.383	73.0161	-87.7737	-94.2486	-62.2074	0	-86.8635	-93.9655	-64.2979	72.1525	-71.7609	-94.3228	-12.2631	0	-87.8277	-86.3595	-86.5622
Arctiini	Lophocampa ronda	-82.2002	-79.9086	34.5622	79.6676	-96.2312	-69.8619	0	72.4773	-83.0202	-85.4223	46.3278	-85.097	-97.5293	-76.7403	0	-78.7336	-89.8873	-71.0866	48.5455	-71.9945	-98.1575	-86.2983	0	-87.2856	-86.3712	-87.4117
Arctiini	Lophocampa texta	-58.392	-62.2939	8.62441	62.2939	-77.2838	-83.0784	0	77.6385	-63.0412	-66.5428	9.72402	-66.5428	-83.9742	-86.9503	0	-84.3469	-71.4651	-71.2097	13.0013	-71.2097	-85.9524	-93.9293	0	-86.7921	-64.964	-83.908
Arctiini	Loxophlebia brasiliensis	127.961	-71.5033	-31.5652	76.248	132.063	-54.2241	-100	-6.00214	84.5058	-83.3275	-18.1492	-87.5585	84.4503	-59.6897	-100	-28.5102	125.378	-54.4472	-44.8507	-64.1186	213.272	-53.1552	-100	59.5927	-84.0484	-8.84244
Arctiini	Lycomorphodes epatra	-53.5445	-54.0509	16.6727	54.0362	33.0544	NA	14.6865	-45.3576	-63.4105	-58.7476	16.3593	-59.1209	30.5021	NA	17.2497	28.1681	-76.9793	-74.638	22.3629	-74.9497	95.9833	NA	87.5649	142.723	-66.0155	80.1757
Arctiini	Lycomorphodes strigosa	-66.8524	-66.1947	1.85464	67.3514	2.15559	NA	9.73771	-14.6401	-75.3203	-71.0619	2.29712	-71.1976	7.56418	NA	9.49653	21.5584	-87.6323	-83.8938	2.86198	-83.8724	19.6355	NA	75.6708	58.2809	-75.4371	29.2802
Arctiini	Lycomorphodes suspecta	-36.9942	-32.1719	4.38851	36.3946	-2.71723	-18.9189	0	5.31374	-41.7519	-45.7831	8.48741	-41.3503	-32.4873	-35.5619	0	-33.437	-47.0876	-41.2244	-2.35019	-46.1923	63.4219	-36.0597	0	55.879	-45.0102	-20.9158
Arctiini	Machadoia xanthosticta	-53.5581	-60.086	28.0572	59.145	-88.3408	-90.4008	-85.6121	93.0338	-58.812	-61.7781	39.6235	-61.8265	-91.8909	-92.5709	-91.9553	-95.6013	-61.0665	-58.4475	29.6988	-60.1568	-70.4783	-94.0958	-81.2058	-85.5201	-60.7387	-93.1471
Arctiini	Macrocneme indistincta	-34.1984	-43.641	-13.2489	49.7354	29.9262	-38.6667	-100	37.3092	-41.0611	-52.6422	-9.0112	-54.3966	11.6614	-48.4228	-100	-62.5954	-46.1361	-48.4956	-7.61081	-52.5573	57.6396	-44.7154	-100	-12.3092	-58.6798	-55.0573
Arctiini	Macrocneme lades	-62.0996	-65.692	16.3996	68.7886	-59.2522	-94.4798	-100	99.4738	-63.6767	-74.9652	23.2903	-76.973	-75.9552	-97.6867	-100	-99.8762	-81.7151	-69.34	14.1722	-74.4722	-42.6856	-97.2338	-100	-100	-79.6362	-99.969
Arctiini	Macrocneme pelotas	-20.6281	-64.3376	0.114912	64.3376	78.2226	-9.43732	0	-19.9122	-23.1263	-80.49	-0.0618757	-80.49	34.7478	-30.1638	0	-7.15853	-26.8856	-52.9946	0.397772	-52.9946	322.978	-17.4145	0	90.9216	-42.1053	-9.10587
Arctiini	Mallodeta clavata	-64.964	-51.7007	22.882	61.5282	-58.3387	NA	-100	30.0156	-72.5899	-55.2964	29.8122	-68.1806	-73.6639	NA	-100	-57.3872	-76.0072	-59.4752	9.64738	-73.2033	-14.3593	NA	-100	23.4837	-69.7302	-48.367
Arctiini	Mallodeta consors	-87.7252	-48.7716	8.21106	66.1625	90.1353	NA	-99.5978	38.5952	-92.9054	-55.6951	18.3341	-74.3417	38.4692	NA	-100	-64.8792	-80.0957	-43.8861	11.6052	-67.3669	129.693	NA	-90.8958	36.7069	-77.1429	-49.4713
Arctiini	Mallodeta sanguipuncta	-54.902	-49.5982	7.03235	49.5982	10.6846	-37.6799	0	27.3892	-65.9464	-58.7054	9.683	-58.7054	-22.5528	-33.9948	0	-33.4778	-58.2233	-30.7589	8.49291	-30.7589	27.991	-51.3628	0	-37.9865	-54.375	-39.894
Arctiini	Mallodeta sortita	-32.5464	-26.3503	-57.4526	50.9526	63.2806	-43.666	4300	0	-37.9257	-41.3932	-44.7408	-62.1218	13.4055	-44.906	2900	-38.4386	-26.8963	-26.8046	-84.509	-51.7744	179.059	-29.7995	-100	97.0661	-61.3373	-22.5758
Arctiini	Mazaeras conferta	-81.5463	-63.5576	3.19583	77.2766	-59.175	-95.395	0	88.0523	-84.4893	-70.4128	14.6699	-81.113	-80.1802	-95.8741	0	-92.7924	-85.4438	-60.9582	-5.42024	-75.4637	-19.9621	-97.4775	0	-80.0936	-84.9283	-86.9111
Arctiini	Mazaeras francki	-75.5599	-61.3274	38.2626	68.6082	-76.6327	-56.8099	964.16	-8.12303	-76.631	-68.8529	48.0799	-74.6134	-83.5787	-64.1507	964.16	-24.2114	-81.7186	-60.6219	25.0697	-73.9175	-38.8826	-67.232	964.16	15.8912	-77.8351	5.67823
Arctiini	Mazaeras janeira	-46.4912	-58.5088	12.6182	64.3263	-44.3672	NA	-99.6946	88.6849	-47.6365	-72.4543	18.5446	-74.395	-42.531	NA	-99.0315	-88.6352	-58.6745	-74.1802	7.83196	-77.323	40.4963	NA	-93.5259	-90.4218	-74.4547	-89.2804
Arctiini	Melese amastris	-61.6509	-61.379	24.9573	67.0458	-27.1776	-55.7303	0	33.5078	-58.75	-71.4736	35.0117	-76.4613	-30.0432	-77.7452	0	-48.3762	-71.7689	-62.3254	13.8617	-73.6493	12.5768	-60.3145	0	-14.6067	-73.3649	-35.2778
Arctiini	Melese asana	-51.4829	-63.3112	55.981	45.7868	-2.01207	NA	0	2.01207	-54.7108	-65.9482	58.8157	-48.3648	-32.0926	NA	0	-32.0926	-58.0534	-64.343	40.3681	-56.8873	47.8873	NA	0	47.8873	-54.2516	-1.00604
Arctiini	Melese babosa	-81.087	-69.8489	61.6244	72.8085	-82.1345	NA	872.171	-17400	-85.4969	-81.353	66.511	-82.5008	-87.1775	NA	854.917	12700	-91.7702	-80.9753	49.0994	-85.478	-66.9273	NA	1344.53	27900	-83.7248	14966.7
Arctiini	Melese castrena	-52.1136	-37.8609	23.996	46.7062	56.7849	15016.7	-88.0507	-401.863	-64.304	-41.7445	37.5161	-50.757	15.7376	13079.2	-89.3858	251.553	-52.5406	-40.5815	17.6361	-48.9771	92.4268	15062.5	-87.2497	608.54	-50.7979	372.981
Arctiini	Melese chozeba	-58.3333	-57.5039	7.67641	57.1984	-81.782	NA	0	81.782	-66.2602	-64.4868	8.49261	-64.3282	-91.2713	NA	0	-91.2713	-71.3161	-64.3095	11.2615	-64.5338	-74.0311	NA	0	-74.0311	-63.3684	-81.6371
Arctiini	Melese dorothea	-72.6081	-69.7156	-2.35592	73.3701	-49.2296	-40.6541	0	41.5138	-77.1439	-78.2475	6.8681	-76.6299	-48.3737	-43.9473	0	-42.1525	-70.5174	-71.0223	-26.1414	-80.6244	9.88017	-60.0954	0	-24.2152	-80.0275	-60.7148
Arctiini	Melese drucei	-52.138	-38.399	16.6897	56.0354	87.8168	59600	-39.3154	-7.07497	-57.6397	-51.8898	32	-62.4732	60.7212	41100	-43.1082	-17.9514	-49.6009	-42.1522	6.75862	-58.9056	255.75	53500	-28.2146	42.8722	-63.3047	-30.095
Arctiini	Melese hebetis	-61.8966	-24.1201	-10.5285	49.3994	-12.7318	-98.5181	-100	100	-67.3103	-26.6687	1.66459	-45.9501	-41.4408	-99.8902	-100	-100	-63.1379	-44.5085	22.6522	-61.2565	66.8688	-99.4512	-100	-100	-59.0699	-100
Arctiini	Melese incertus	-50.9434	-42.3516	28.0453	28.5636	-9.06603	-50.5691	18.6154	13.9974	-48.1132	-58.9384	25.9679	-58.0557	-24.9544	-40.2168	16.0318	-9.01693	128.302	-37.7811	-3.74567	-31.5674	44.71	-97.29	35.111	-14.3229	-67.0672	-8.23568
Arctiini	Melese ocellata	-19.8739	-30.8353	25.4295	28.3362	4.02798	-65.4951	136.505	15.4831	-28.591	-27.8446	35.0729	-22.9636	-21.6836	-66.9312	194.757	-33.7602	-15.3783	-19.9725	13.2743	-23.4547	81.6691	-42.5926	173.204	101.63	-26.372	-37.9511
Arctiini	Melese peruviana	-55.7071	-45.7787	-6.20599	59.7484	-41.0474	-99.9736	-84.4593	92.2634	-53.6837	-56.1499	-1.01444	-62.7673	-52.1934	-100	-82.3512	-94.2914	-72.0915	-60.3348	-9.52381	-72.3774	9.75828	-100	-72.3993	-83.9509	-65.9874	-95.6435
Arctiini	Mesothen desperata	-63.8432	-49.4828	-25.5461	64.7283	-63.3837	-100	-100	100	-59.292	-42.941	-22.6839	-59.2179	-56.0891	-100	-100	-100	-81.4665	-60.0224	-14.3736	-80.6501	-55.9869	-100	-100	-100	-72.0416	-100
Arctiini	Mesothen inconspicuata	-60.0152	-50.6658	-6.74291	51.2912	4.41315	-40.5669	0	-4.41315	-66.0773	-67.3431	-2.30877	-62.9507	10.4977	-69.6191	0	10.4977	-84.5416	-80.5644	-1.33779	-81.3603	16.1878	-97.5199	0	16.1878	-69.394	10.5728
Arctiini	Metallosia chrysotis	-27.8894	-16.5197	3.86887	28.1811	117.887	-48.2795	1260	10.3595	-28.1214	-13.0936	1.76135	-26.2881	117.491	-33.0259	1415	20.78	-56.8999	-41.0448	4.62228	-56.2842	130.826	-56.3675	2990	10.2986	-49.2194	-5.72821
Arctiini	Metalobosia cuprea	-84.6497	-78.3776	13.5401	80.2981	-75.6914	-88.1574	-100	98.5114	-90.077	-82.8614	17.2718	-84.5431	-83.4061	-93.8706	-100	-98.5114	-91.9806	-81.9469	10.0353	-83.7978	-75.7399	-95.9137	-100	-98.8248	-83.895	-98.877
Arctiini	Metalobosia varda	-60.1854	-60.3647	42.7207	56.765	-76.9419	NA	-100	100	-56.5905	-62.4404	42.9499	-56.1564	-82.4612	NA	-100	-100	-77.9787	-78.9621	43.2684	-77.0833	-86.1815	NA	-100	-100	-63.6236	-100
Arctiini	Metamya aenetus	-61.106	-58.4311	29.3536	58.4048	-73.3087	-30	1999.08	-817.834	-55.7381	-57.2579	41.2587	-55	-79.0898	-65.625	1999.08	621.656	-73.4382	-69.6572	12.468	-71.6905	-55.2768	-80.625	1999.08	1357.96	-65.8571	938.217
Arctiini	Metamya flavia	-94.4354	-81.3	8.41272	88.2473	-61.5691	-39.7167	-73.5887	61.6057	-92.144	-77.05	12.9937	-85.3599	-75.0542	-46.7025	-77.5849	-75.2347	-100	-91.6	18.6022	-96.7873	-76.5727	-36.297	-81.9038	-77.2418	-93.4933	-70.4759
Arctiini	Mirandisca harpalyce	-72.1768	-50.1946	16.1403	62.015	-57.4147	NA	-88.3256	71.4542	-76.8111	-57.9248	26.5318	-66.2927	-68.7971	NA	-93.2379	-78.8151	-81.3743	-50.5058	19.4877	-63.5344	-17.7379	NA	-84.4429	-43.7702	-67.5549	-68.5817
Arctiini	Munona iridescens	-52.946	-42.2391	3.68196	46.1775	-27.9023	NA	0	27.9023	-57.3754	-53.1222	11.5719	-55.8516	-47.2142	NA	0	-47.2142	-63.3086	-54.9509	7.73089	-58.2496	-24.4839	NA	0	-24.4839	-57.0404	-30.0555
Arctiini	Napata atricincta	-10.8829	-68.5943	5.46658	68.5943	55.7799	-19.0843	52.7837	-28.581	-18.874	-73.7189	5.21722	-73.7189	56.9521	-10.2667	52.8908	28.1439	-24.5739	-44.5698	6.80925	-44.5698	151.905	-32.4495	158.726	106.052	-32.111	67.8884
Arctiini	Napata banghaasi	-51.5401	-49.4511	3.52956	57.2416	4.93274	-53.7591	-51.3493	46.4516	-53.3447	-54.3547	8.48624	-60.076	-4.91031	-59.3796	-68.4328	-61.9851	-63.9235	-55.1842	13.2008	-66.0387	-5.60538	-70.365	-28.7695	-39.2308	-60.1106	-49.2556
Arctiini	Napata castra	-82.5662	-77.8055	24.6708	79.3412	-95.0165	-84.0356	0	94.6164	-84.6583	-82.3774	31.8767	-82.4725	-96.85	-86.5095	0	-95.424	-93.5844	-84.9543	43.7997	-87.3932	-97.7903	-91.8825	0	-97.3082	-83.4892	-95.6931
Arctiini	Napata jynx	-69.1354	-66.4745	-27.4013	68.8673	10.8508	-44.9041	-36.2254	26.2832	-74.6828	-77.3888	-6.53208	-74.5308	0.969305	-60.1918	-34.4552	-18.7048	-84.1841	-84.0198	-29.8701	-86.5282	66.7474	-55.036	25.7542	55.5977	-76.1394	-16.4657
Arctiini	Napata splendida	-83.2968	-74.6374	28.438	75.8621	-86.1681	-59.7862	0	59.035	-88.4447	-83.3007	39.7101	-87.1741	-81.5842	-67.0878	0	-65.2813	-95.6188	-75.5782	19.7585	-80.4878	-51.9501	-64.9253	0	-56.6941	-89.2767	-72.0053
Arctiini	Napata terminalis	-42.0314	-26.7516	21.3863	35.053	75.5725	-58.0729	20.2982	-32.391	-44.4964	-15.6847	20.0935	-25.371	77.313	-64.5833	18.3104	29.2407	-65.4484	-59.6338	31.8692	-56.9611	128.153	-74.2188	24.4266	34.0468	-34.629	56.3005
Arctiini	Neidalia orientalis	-74.7126	-68.5597	48.9859	80.0553	-94.1547	10.8307	0	71.6605	-77.1325	-79.2593	46.0124	-87.7172	-92.9856	-23.8696	0	-77.048	-91.1373	-91.7695	41.9732	-92.4961	-85.9263	-33.0179	0	-79.4096	-89.1785	-85.2768
Arctiini	Neonerita dorsipuncta	-73.7659	-41.1544	4.05707	57.6421	-46.2185	NA	2058.38	-10868.8	-72.6382	-44.0206	14.7843	-59.6774	-63.9256	NA	2058.38	6912.5	-78.924	-52.0656	4.58999	-64.7657	-24.97	NA	2058.38	14818.8	-63.5561	10150
Arctiini	Neotrichura nigripes	-38.0615	-50.6226	27.0641	56.1951	-64.8153	-53.3269	-100	76.9492	-39.5826	-53.7738	38.4247	-59.6541	-80.0172	-54.6072	-100	-85.9371	-55.3237	-56.1118	22.0443	-64.5308	-30.7186	-69.6217	-100	-65.0978	-64.4741	-86.4191
Arctiini	Neritos leucoplaga	-17.0423	-59.1003	0.28102	59.1003	55.441	-32.0196	0	19.1857	-31.2197	-71.4187	4.32339	-71.4187	16.2658	-37.1114	0	-29.3754	5.09796	-60	7.68482	-60	392.898	-21.4198	0	40.1194	-55.4325	-49.4564
Arctiini	Neritos repanda	-73.5513	-63.5406	3.2967	68.69	-80.2372	-57.2853	0	72.1675	-79.0575	-70.6118	10.3938	-75.1679	-89.6155	-65.4141	0	-80.3432	-83.8182	-60.8074	5.64332	-68.2102	-78.0812	-77.6074	0	-76.8105	-76.5355	-77.618
Arctiini	Arctiini NI125	-64.8095	-71.3309	59.3412	67.5049	-96.1587	-98.4252	0	96.1587	-68.3333	-77.7416	68.9312	-74.1847	-97.5365	-99.2126	0	-97.5365	-81.5714	-70.5825	49.9914	-74.8134	-98.1211	-99.2126	0	-98.1211	-76.5422	-97.5365
Arctiini	Arctiini NI23	-80.67	-80.3922	32.8023	79.7181	-94.4167	NA	-25.4783	93.2121	-84.9533	-84.1737	30.4613	-85.7843	-91.1266	NA	-20.6253	-89.2121	-93.1356	-97.549	10.3061	-94.6691	-65.1047	NA	67.2888	-57.5758	-86.152	-66.9091
Arctiini	Arctiini NI33	-40.7442	-53.6849	13.6804	54.1985	-3.38927	NA	-43.8596	37.4016	-42.8639	-60.2864	25.5608	-57.1065	-32.8068	NA	-47.3684	-41.3386	-47.3387	-48.4108	11.1188	-53.3261	71.8657	NA	188.421	223.622	-60.6688	-43.7008
Arctiini	Arctiini NI35	-96.1066	-87.9518	23.5592	91.337	-99.021	5.81114	0	75.529	-96.1749	-87.1486	24.681	-89.9727	-98.8811	-11.3801	0	-79.2729	-100	-100	26.0559	-100	-99.8601	-43.0993	0	-87.1405	-96.9304	-95.2252
Lithosiini	Lithosiini NI42	-60.719	-70.6629	12.5016	68.4765	-45.2196	-68.2517	35.9847	70.5882	-77.2304	-79.9556	16.4083	-79.9433	-56.2016	-88.7608	36.7078	-60.0713	-53.3955	-65.6518	14.858	-66.1669	216.925	-64.5053	113.228	188.77	-82.4149	-58.8235
Lithosiini	Lithosiini NI52	-65.0036	-67.6233	2.00457	70.0617	-15.1624	-72.398	-7.42736	40.1386	-75.1265	-77.4888	0.934774	-77.037	-30.1815	-72.2449	-11.1836	-63.6461	-75.7773	-79.9103	2.9705	-76.8519	59.766	-87.9592	-21.5592	-5.25053	-78.3951	-64.9254
Lithosiini	Lithosiini NI54	-76.571	-47.7716	1.7248	47.7716	-46.9976	-93.0233	-46.7481	51.3429	-78.9846	-60.6685	2.07934	-60.6685	-65.9037	-79.0698	-67.6512	-80.6767	-94.9646	-68.9972	9.43848	-68.9972	-65.7848	230.233	-44.9588	-63.3764	-71.5599	-56.2609
Arctiini	Arctiini NI92	NA	-100	3.89238	100	-100	-100	0	100	NA	-100	5.26997	-100	-100	-100	0	-100	NA	-100	5.02959	-100	-100	-100	0	-100	-100	-100
Lithosiini	Nodozana endoxantha	-89.2724	-82.8383	1.63184	82.8383	-97.4779	-55.2306	0	59.9014	-90.8116	-85.5728	3.05373	-85.5728	-97.9823	-53.1315	0	-57.9612	-97.2948	-78.0764	4.0271	-78.0764	-97.7301	-42.9456	0	-47.8596	-87.6945	-78.4416
Lithosiini	Nodozana jucunda	-51.4011	-48.0371	-47.6209	61.3208	152.778	NA	-68.398	53.1847	-60.989	-56.6521	-52.0532	-69.8375	157.506	NA	-70.6657	-61.1465	-60.467	-61.6412	-38.9258	-70.8071	183.958	NA	-68.6174	-54.7771	-72.8249	-76.1146
Lithosiini	Nodozana rhodosticta	-48.6388	-49.6929	-13.8759	50.6909	4.47566	-64.6425	23.9098	-9.23643	-56.7453	-56.1015	-15.9953	-57.2745	5.97378	-64.0443	24.2607	8.34956	-63.0067	-67.1562	10.7026	-64.5354	20.4682	-83.3383	89.6241	18.6243	-57.2474	12.8272
Arctiini	Notophyson tiresias	-37.4052	-50.1546	-10.0939	42.0832	174.874	-55.2058	0	-133.973	-46.3071	-61.9072	-5.12008	-42.7118	170.201	-70.8232	0	127.016	-54.0827	-58.4021	-21.3215	-56.2107	206.491	-84.7458	0	153.178	-61.1194	135.775
Arctiini	Nyridela acroxantha	-48.4085	-55.3523	50.0652	65.3647	-76.1035	NA	-96.4649	17.6282	-46.817	-71.759	54.986	-75.0498	-80.175	NA	-98.0228	-37.9808	-51.492	-65.7881	17.2041	-71.8214	-39.726	NA	-90.4733	60.8974	-73.0171	-36.5385
Arctiini	Ochrodota brunnescens	-46.648	-41.4615	10.4705	41.4615	-33.795	NA	816.667	100	-41.3408	-42.8276	11.7317	-42.8276	-55.6479	NA	775	-12.5	-70.1117	-66.4178	7.28063	-66.4178	-46.9375	NA	1641.67	75	-59.5393	-100
Lithosiini	Odozana obscura	-57.8144	-64.2509	18.7947	68.4876	24.8775	-72.7273	-100	93.8994	-69.2308	-75.7613	24.4632	-78.0909	-2.49708	-82.1114	-100	-95.5862	-73.3211	-70.0974	26.9969	-75.2156	70.4084	-66.9599	-100	-86.6742	-79.471	-96.2609
Arctiini	Opharus basalis	-59.8044	-47.2143	11.7929	56.4024	-32.4315	-72.2022	0	53.8938	-67.2127	-55.6926	18.7066	-63.6023	-60.7548	-78.1588	0	-69.292	-71.7848	-48.6457	8.05491	-63.5788	20.2071	-71.8813	0	-36.6903	-67.5657	-54.2478
Arctiini	Opharus bimaculata	-49.6142	-37.341	-13.9324	48.996	-17.4717	NA	-100	-163.964	-53.1157	-41.1098	-5.55556	-48.5944	-56.4528	NA	-100	35.1351	-65.183	-49.2486	-11.1608	-60.8117	9.28302	NA	-100	489.189	-56.7533	21.6216
Arctiini	Opharus flavimaculata	-71.1571	-45.4907	3.76506	66.0804	-95.3855	-37.9462	0	73.1589	-74.451	-58.4218	7.05093	-74.336	-97.7199	-65.5135	0	-84.5284	-84.7551	-40.3515	8.25575	-69.3108	-95.494	-0.549149	0	-47.7067	-79.8995	-83.2041
Arctiini	Opharus notata	-85.3242	-73.7864	39.9367	69.3911	-95.5947	-23.9017	-95.0372	95.0195	-88.0546	-81.0306	36.2059	-84.4761	-93.3921	-55.175	-90.0744	-92.0898	-100	-82.8603	20.4157	-79.4844	-90.3965	-22.7352	-64.268	-88.5742	-91.8267	-91.9922
Arctiini	Opharus procroides	-65.3755	-48.0066	21.8207	59.4657	-75.7886	NA	-100	81.4305	-67.4482	-52.3484	30.4934	-60.6562	-83.6542	NA	-100	-88.2275	-76.1468	-58.5472	16.0389	-70.2381	-42.0729	NA	-100	-70.9018	-69.2218	-87.6944
Arctiini	Opharus rema	-49.6625	-52.1595	27.4071	54.7826	-75.2436	NA	-76.119	74.535	-56.6538	-55.458	38.5288	-57.8019	-81.0452	NA	-81.7293	-80.9566	-60.704	-55.5292	28.0426	-60.8213	-31.3109	NA	-66.591	-30.9123	-60.7488	-70.992
Arctiini	Ordishia rutilus	-64.8553	-63.175	13.0929	64.9319	3.07632	-71.0997	0	-1.83136	-69.6293	-67.3945	16.5934	-68.5014	7.22352	-40.9207	0	5.30332	-87.5063	-87.9906	25.322	-87.5749	20.0545	-51.1509	0	18.7524	-70.4905	6.88668
Arctiini	Ormetica chrysomelas	-57.936	-43.7822	-2.00665	50.8927	-69.875	-47.3047	-100	77.2222	-63.1278	-49.3525	5.09969	-56.7826	-81.2563	-52.8655	-100	-84.9673	-69.252	-51.6409	1.4954	-58.9361	-57.0078	-59.6747	-100	-66.9281	-59.7828	-79.281
Arctiini	Ormetica fulgurata	-72.3825	-75.6123	16.0103	79.0547	41.3008	-38.3935	-100	-4.41408	-71.3776	-86.8439	21.9667	-87.2104	5.78862	-52.0586	-100	-16.1324	-47.9417	-62.8761	5.55284	-65.9561	109.203	-19.4241	-100	75.7225	-79.7961	-7.567
Arctiini	Ormetica neira	-44.493	-48.2786	1.90625	49.7195	-2.67142	-77.4067	0	29.4422	-48.0318	-64.7105	4.28006	-63.182	-32.5616	-79.3713	0	-50.508	-49.2247	-20.5008	6.79775	-38.1948	62.897	-89.6857	0	6.05712	-60.9383	-30.8798
Arctiini	Ormetica rothschildi	-47.1289	-48.4028	36.7015	43.3829	0	NA	0	0	-49.8917	-52.6259	47.5029	-43.2123	0	NA	0	0	-61.6107	-57.255	23.71	-58.1769	0	NA	0	0	-53.4	0
Arctiini	Pachydota albiceps	-60.6324	-63.8386	-15.4507	63.4078	-18.3512	-26.3126	0	19.9308	-66.8839	-74.5473	-7.37602	-69.2458	-19.9034	-48.6675	0	-34.3133	-67.4632	-69.1154	-30.8899	-77.5978	88.7202	-41.9451	0	4.69808	-74.4972	-17.4233
Arctiini	Pachydota ducasa	-60.6324	-63.8386	-15.4507	63.4078	-18.3512	-78.2274	0	21.679	-66.8839	-74.5473	-7.37602	-69.2458	-19.9034	-41.2331	0	-21.8398	-67.4632	-69.1154	-30.8899	-77.5978	88.7202	-49.711	0	76.0695	-74.4972	-5.72531
Arctiini	Paracles affinis	-86.5433	-83.944	25.5456	82.3125	-95.2327	-92.2252	0	94.6517	-91.8419	-89.2241	28.1415	-88.3689	-96.8218	-89.1421	0	-94.9683	-99.8318	-86.8534	25.0747	-86.5107	-96.2543	-100	0	-96.5165	-92.4983	-96.3758
Arctiini	Paracles bilinea	-66.8425	-51.7383	11.5271	61.9482	-93.0273	64.3145	0	80.0361	-68.2884	-58.0221	18.0208	-70.0617	-94.3637	24.5968	0	-84.8238	-78.8394	-57.8161	23.5669	-68.1874	-90.8193	10.8871	0	-77.4164	-72.5277	-83.3333
Arctiini	Paracles brunnea	-81.4125	-68.986	44.1587	76.3519	-92.8952	-98.2184	-100	94.9733	-83.5949	-78.4087	50.3016	-82.5721	-94.9378	-98.7783	-100	-96.1919	-92.668	-66.5835	52.254	-76.2118	-95.9147	-99.6946	-100	-97.1059	-85.5422	-96.3442
Arctiini	Paracles costata	-88.9754	-86.7856	29.1652	87.381	-92.75	-86.9145	0	93.9555	-90.3626	-91.0823	28.7577	-91.4583	-93.75	-89.2315	0	-95.2801	-96.3251	-78.557	30.085	-83.0655	-92.3125	-81.0135	0	-91.7631	-87.7976	-96.3307
Arctiini	Paracles fervida	-90.6225	-62.5687	4.68896	69.5589	-91.5828	-74.6269	0	82.7456	-86.0954	-68.7368	5.02806	-72.2734	-93.6566	-75.4229	0	-84.4311	-100	-72.4123	11.2839	-69.5589	-95.3644	-83.7313	0	-89.3768	-89.0936	-87.5139
Arctiini	Paracles fusca	-71.8906	-57.0507	1.57611	65.6525	-89.071	-58.9557	-100	93.1224	-74.5727	-61.0025	7.79088	-69.1909	-88.7547	-63.4177	-100	-93.5421	-88.2461	-66.5141	7.66274	-77.4172	-93.9603	-85.9177	-100	-99.2896	-75.9748	-97.1908
Arctiini	Paracles paula	-88.0989	-89.0934	12.9064	85.9971	-97.073	NA	0	97.073	-89.5437	-89.4156	12.6897	-87.3167	-97.8156	NA	0	-97.8156	-99.5437	-94.6618	12.8867	-95.4179	-98.3399	NA	0	-98.3399	-92.5587	-97.8156
Arctiini	Paracles sp.4	-78.9806	-62.446	21.2719	65.8623	-90.4708	-60.8943	0	81.3676	-79.8058	-73.4173	28.1725	-75.8703	-92.9098	-69.4109	0	-86.3699	-97.3786	-67.7338	41.9737	-69.9763	-94.7816	-49.6806	0	-79.5778	-84.0585	-91.3263
Arctiini	Paracles sp.5	-87.2464	-65.5658	17.1566	58.1322	-97.6265	-76.8065	0	87.1221	-94.6377	-76.1432	13.5194	-71.1494	-97.5369	-84.2657	0	-90.266	-100	-82.7945	19.8902	-78.6494	-98.8804	-89.7436	0	-93.9238	-93.4195	-96.1306
Arctiini	Paracles sp.6	-81.592	-57.293	34.7234	54.609	-91.1126	-97.3684	-92.6966	95.3917	-86.8988	-66.4522	42.6094	-70.6294	-94.1738	-89.4737	-87.8277	-94.0092	-96.5174	-59.3093	30.1679	-67.26	-93.713	-94.7368	-32.2097	-88.2488	-79.8792	-95.6221
Arctiini	Paracles variegata	-63.2512	-63.6899	-7.92547	65.7373	-86.375	141.667	-74.3827	86.822	-70.613	-65.6057	-1.48776	-69.4548	-90.8218	74.3056	-68.3535	-91.2031	-78.9062	-63.3363	3.30923	-70.9727	-84.952	55.5556	-75.0545	-86.2656	-73.6989	-88.9082
Arctiini	Paracles vulpina	-75.2322	-90.4801	7.71119	86.3752	-100	-89.2842	0	92.3472	-69.5906	-81.1258	14.8309	-77.4618	-98.873	-91.6137	0	-93.5269	-96.8008	-100	14.8533	-96.6044	-98.1045	-98.5176	0	-97.8221	-90.8319	-98.8203
Arctiini	Paraethria triseriata	-68.8772	-62.0617	-17.562	71.6277	-95.4272	NA	0	90.6771	-70.5614	-63.0084	-13.2246	-73.1614	-96.207	NA	0	-93.0521	-90.5263	-78.5414	-4.35071	-89.8571	-98.3694	NA	0	-97.1641	-81.0735	-94.2928
Arctiini	Parathyris cedonulli	-75.3411	-46.744	9.70826	64.8618	-48.2148	-49.6897	-57.8947	68.216	-78.0702	-62.3469	11.9024	-72.5104	-40.95	-50.737	-21.0526	-47.095	-85.4776	-67.8594	19.1714	-73.4949	5.86774	-85.0272	-5.26316	-94.3267	-77.5842	-72.5906
Arctiini	Pareuchaetes aurata	-58.0924	-60.6052	9.7405	63.4389	-79.9073	-60.8728	0	89.7446	-55.1804	-66.2248	16.5852	-62.7376	-80.474	-62.2532	0	-91.5431	-72.3992	-74.0634	-4.50044	-78.0543	-68.9851	-80.2583	0	-80.3679	-68.2805	-84.5277
Arctiini	Pareuchaetes insulata	-62.2463	-51.8094	2.47167	61.275	3.87507	NA	-0.57853	-3.34522	-66.8712	-66.1339	9.64553	-65.2712	10.4685	NA	-7.45661	4.52427	-82.9401	-81.152	10.8994	-82.3739	15.481	NA	32.4191	22.7584	-69.981	12.6679
Arctiini	Parevia vulmaria	-75.9297	-64.7772	21.6224	71.5229	270.669	-38.223	0	-154.587	-75.1521	-79.5934	31.3318	-82.0932	188.816	-55.9926	0	97.5462	-57.0318	-48.2017	17.5871	-57.0584	340.899	-18.8801	0	195.281	-75.9736	154.738
Arctiini	Pelochyta arontes	-41.7627	-45.9152	7.35045	47.9128	-6.72348	-93.75	-100	80	-43.3468	-41.2776	21.6213	-44.6836	-29.7348	-100	-100	-100	-52.4482	-57.0639	-24.8534	-63.1137	26.1742	-100	-100	-100	-55.1851	-100
Arctiini	Pelochyta cinerea	-67.1651	-51.4144	14.3632	59.2329	-85.3255	-25.0284	0	73.6772	-72.0573	-59.8359	24.431	-63.8009	-91.2504	-38.8763	0	-81.1064	-77.5903	-52.602	20.1507	-65.2446	-75.3703	-53.0079	0	-72.1005	-67.5501	-73.1694
Arctiini	Pelochyta pallida	-70.9467	-68.0573	13.279	74.0473	-89.8051	-88.2474	294.527	53.4247	-71.4286	-77.9265	19.1411	-80	-92.2539	-86.5979	294.527	-64.9706	-87.6701	-76.8369	13.9455	-83.0876	-89.2554	-97.9381	294.527	-48.9237	-82.8373	-58.5127
Arctiini	Phaegoptera albimacula	-61.878	-77.5312	27.0348	78.2609	-88.1075	-32.2222	-100	74.4731	-66.0681	-84.2201	30.5522	-84.3955	-90.4271	-53.3333	-100	-78.9227	-82.2671	-76.4062	28.1873	-79.8987	-83.1001	-66.6667	-100	-76.3466	-83.5914	-78.9227
Arctiini	Phaegoptera chorima	-76.9961	-73.6718	9.24514	75.5501	-95.1045	NA	-41.1072	93.2027	-79.672	-76.5636	15.6135	-77.8205	-96.2046	NA	-60.8972	-93.9375	-93.3103	-80.9011	15.552	-82.8502	-97.0297	NA	-39.071	-94.4274	-83.6186	-94.305
Arctiini	Phaegoptera depicta	-87.9152	-65.4434	24.9021	75.0126	-75.4288	-85.9315	-10.0358	74.5409	-90.6469	-76.5749	29.4962	-83.9295	-78.3971	-89.0175	25.8065	-79.8831	-94.7334	-74.4343	14.2783	-84.0302	-58.0805	-91.1051	60.5735	-58.5142	-85.995	-76.8364
Arctiini	Phaegoptera flavopunctata	-68.0751	-64.4134	26.8107	72.0406	-91.7628	-74.8522	-100	92.1144	-69.4836	-75.3162	37.1382	-79.3286	-92.1472	-78.13	-100	-92.8123	-79.1293	-49.2368	31.1319	-61.8816	-83.1411	-69.1026	-100	-91.1375	-81.0071	-92.6727
Arctiini	Phaegoptera granifera	-84.0695	-69.2548	17.1555	74.3312	-21.1436	-88.4568	-100	83.3398	-90.1316	-78.0936	25.1522	-83.1164	-32.4146	-92.4066	-100	-87.1635	-92.6692	-68.5615	14.9696	-77.585	42.246	-83.711	-100	-78.4237	-86.0087	-89.9337
Arctiini	Phaegoptera histrionica	-76.1024	-65.151	1.07829	74.792	-83.5475	-70.5666	-100	88.0816	-78.0443	-74.9393	6.72807	-81.6202	-86.6167	-74.9158	-100	-92.9134	-86.8175	-62.3395	5.43637	-77.6309	-74.9465	-72.4349	-100	-88.0816	-81.0328	-91.6249
Arctiini	Phaegoptera nexa	-87.1046	-84.2767	15.3535	85.9175	-96.1487	-29.8158	-95.3811	96.0762	-91.9708	-91.6143	15.2015	-92.4609	-96.7463	-31.2473	-91.1085	-94.9552	-100	-100	14.3407	-100	-91.4343	-44.2612	-71.8245	-83.6883	-93.5989	-95.852
Arctiini	Phaegoptera pseudocatenata	-81.1179	-83.4375	21.5578	76.1584	-93.1945	-93.4307	-72.1763	90.5858	-80.8862	-86.7708	23.4885	-75.9478	-94.273	-94.7689	-86.7769	-93.5146	-81.8129	-84.375	16.0084	-82.3926	-84.1949	-98.0535	5.78512	-73.2218	-88.5004	-91.1088
Arctiini	Phaegoptera punctularis	-94.0806	-79.6821	25.135	87.2051	-94.2379	-78.3366	-53.1073	61.8056	-95.0934	-85.9769	34.6689	-90.8687	-95.0434	-87.4275	-61.5819	-63.8889	-98.4245	-70.5827	38.1643	-81.5432	-92.5651	-99.2263	219.209	-49.3056	-91.3961	-54.8611
Arctiini	Phaegoptera schaefferi	-88.0815	-73.47	10.7955	78.7142	-77.4847	-80.4396	0	76.7052	-89.6929	-79.8671	19.5266	-83.3603	-85.4451	-81.3919	0	-83.3666	-97.1724	-69.2329	16.568	-76.9854	-81.5356	-87.326	0	-82.3694	-85.7645	-80.8137
Arctiini	Phaegoptera superba	-93.678	-84.6691	32.8122	90.4808	-81.8855	-93.9731	-55.0737	95.1266	-96.8234	-89.3582	47.098	-91.9231	-82.314	-95.3906	-58.6336	-95.717	-99.7197	-80.6784	31.0161	-88.2372	-64.7059	-97.267	-50.7896	-90.4133	-95.0641	-94.1859
Arctiini	Phaloe cruenta	-33.8996	-15.429	13.2291	31.3379	64.9395	-60.5881	-98.9036	1.14985	-37.9955	-21.1493	28.4235	-30.4555	48.3167	-63.7641	-98.5153	-16.0237	-50.6795	-32.5112	8.0093	-45.2898	139.637	-66.9575	-99.9086	30.2114	-39.7567	-4.17285
Arctiini	Pheia albisigna	-63.5574	-49.086	7.04737	52.9901	-20.0866	-46.6667	-11.2933	19.7128	-66.9412	-63.8834	13.1733	-62.5225	-28.5137	6.66667	-8.34886	-17.2324	-72.6848	-58.7698	-5.91823	-65.3327	69.4661	-100	91.3157	84.8564	-65.9847	-34.6388
Arctiini	Pheia catherina	-47.0917	-35.0649	-21.3699	55.8205	95.3195	-99.921	0	27.8839	-52.3321	-36.1522	-12.4536	-62.0317	45.9096	-100	0	-51.7978	-53.0344	-31.7729	-14.5204	-56.7622	111.844	-100	0	-12.6779	-60.4889	-29.6629
Arctiini	Pheia elegans	-56.4317	-55.3641	4.11245	54.0124	-49.5847	-50.4244	0	44.3635	-64.7177	-62.686	3.55617	-64.9198	-72.3323	-62.9032	0	-69.6602	-70.8988	-53.798	3.94358	-60.0066	-24.984	-28.9474	0	-17.6645	-62.5614	-62.5405
Arctiini	Pheia picta	-51.8233	-34.9195	5.23475	47.2208	115.849	-99.8752	137.36	-271.907	-53.6598	-42.6518	15.7447	-50.0248	86.8057	-100	114.461	186.39	-66.8352	-55.3408	-17.013	-66.0794	154.376	-100	224.198	332.314	-58.9082	233.188
Arctiini	Philoros rubriceps	-76.4752	-59.1863	10.7054	70.1875	-83.5072	-99.6686	-61.2425	93.8509	-77.9241	-67.5026	18.9373	-75.4094	-86.5385	-99.6941	-67.4548	-95.0062	-86.9073	-60.5937	18.2568	-72.1339	-78.781	-100	-54.1227	-92	-76.8811	-94.2484
Arctiini	Phoenicoprocta analis	-41.751	-42.0065	-27.1545	48.4589	9.28249	NA	0	-13.5976	-49.0561	-55.2361	-20.0438	-60.0457	-8.15354	NA	0	3.03562	-54.0903	-66.2364	-19.4384	-70.8619	0.727546	NA	0	0.928249	-56.7922	7.02459
Arctiini	Phoenicoprocta haemorrhoidalis	-75.2117	-10.6573	-17.2488	41.4201	-14.7244	35333.3	-100	93.75	-83.1409	-7.34443	4.1913	-25.3452	-22.4006	24000	-100	-97.7113	-82.1786	-34.6538	-36.3783	-77.5641	45.2198	32666.7	-100	-83.0106	-55.7446	-99.3838
Arctiini	Phoenicoprocta steinbachi	-59.7849	-47.2606	3.55398	47.2606	-9.41041	-55.7922	-24.3644	37.3178	-62.3872	-66.2903	3.5444	-66.2903	-26.1127	-61.7547	-42.3729	-60.8601	-69.2922	-46.0895	2.53856	-46.0895	16.0782	-20.6985	100.953	93.8776	-60.895	-59.2566
Arctiini	Phoenicoprocta teda	-53.3591	-32.2447	-14.5332	50.9972	19.2544	NA	-100	100	-55.828	-34.8574	-7.15922	-51.4245	5.88858	NA	-100	-100	-68.2398	-46.7668	-8.93471	-66.0078	12.5821	NA	-100	-92.8571	-58.8853	-100
Arctiini	Phoenicoprocta vacillans	-74.5178	-34.6021	-2.22609	67.0424	-60.5128	-66.0885	291.16	-14.2648	-78.1218	-49.654	0.870538	-72.4801	-45.1282	-77.9705	291.16	-21.7624	-86.9543	-33.391	-3.24586	-76.061	77.0085	-75.6982	291.16	34.1285	-74.9337	-2.82376
Arctiini	Pionia elongata	-43.0226	-69.2343	9.15842	67.2065	37.7629	-81.8958	0	56.9432	-45.2289	-80.1926	9.64168	-73.9091	2.95302	-81.7437	0	-68.0679	-52.8406	-53.7368	1.56766	-55.7805	152.304	-75.0263	0	-31.0781	-70.9852	-50.4991
Arctiini	Pionia lycoides	-69.812	-42.3173	15.3515	58.5799	-56.3443	-65.8827	3.12018	57.9171	-77.5127	-59.6502	27.7419	-67.8605	-71.5617	-74.8609	-17.2188	-70.5467	-74.1504	-54.9969	-12.3739	-70.2896	8.29636	-62.2661	66.5254	7.82281	-66.8016	-54.901
Arctiini	Poliopastea plumbea	-53.2772	-46.6667	5.43578	45.1908	3.80886	-56.808	0	20.0335	-51.6998	-76.399	3.59336	-50.6036	2.79317	-66.4693	0	-22.011	-70.2297	-60.146	2.02535	-57.6519	20.3832	-67.8664	0	-7.86431	-63.6293	-24.3383
Lithosiini	Pronola magniplaga	-55.0286	-44.722	9.66411	51.6971	47.386	-89.6649	-100	97.032	-67.3344	-45.2842	6.43489	-57.6697	-4.18235	-94.1093	-100	-97.032	-70.7686	-64.7408	21.5557	-70.7572	149.101	-97.3545	-100	-96.4992	-61.8799	-100
Arctiini	Prosopidia oviplaga	-90.7287	-36.5678	-1.82137	70.9207	-28.8567	-83.3333	83.3333	100	-91.9521	-18.8598	-6.59661	-64.1855	-40.6657	-100	500	-100	-91.9657	-41.0308	0.793929	-72.0872	-44.2258	-100	491.667	-100	-71.5595	-100
Arctiini	Pseudohyaleucerea vulnerata	-59.4629	-38.8917	-1.00692	50.6867	-26.6522	-30.7692	-100	41.6196	-65.5828	-47.3922	5.82756	-55.9657	-63.0553	-20.1183	-100	-69.6798	-68.2316	-41.7503	2.02643	-58.2189	78.169	-46.7456	-100	77.7778	-57.3605	-88.5122
Arctiini	Pseudomya tipulina	-93.1318	-46.0179	15.3918	62.423	-31.9831	-99.9272	-99.8448	74.6637	-96.7548	-51.6116	26.8812	-63.2519	-48.8815	-100	-99.8276	-81.2792	-85.8191	-52.1314	19.1853	-69.1817	-18.4099	-100	-99.0862	-53.9116	-67.2901	-75.6794
Arctiini	Pseudosphex ichneumonea	-46.1329	-45.1167	8.70164	48.1274	-3.7656	NA	0	3.7656	-56.8083	-50.7371	17.7613	-51.2828	-32.4198	NA	0	-32.4198	-53.622	-38.8206	11.414	-46.3875	37.2995	NA	0	37.2995	-50.6635	-2.02763
Arctiini	Pseudosphex noverca	-58.2741	-54.8428	14.9147	57.8456	-36.128	-50.4696	-81.2849	45.079	-66.5228	-64.7547	21.7639	-67.2805	-48.6908	-49.1525	-94.2737	-54.3665	-72.5381	-67.1195	21.0631	-74.672	-47.818	-65.8966	-98.743	-57.9706	-63.5217	-54.2556
Arctiini	Pseudosphex rubripalpus	-60.7634	-48.6315	13.6511	59.9202	-61.2957	-84.6721	1608.05	61.3875	-63.0534	-59.9115	23.6268	-68.7571	-64.7287	-87.4565	1608.05	-68.2793	-71.7939	-54.2162	9.46419	-68.5291	-21.4839	-83.2939	1608.05	-31.4925	-70.2965	-56.3213
Arctiini	Pseudotessellarctia brunneitincta	-72.8281	-77.3067	42.9644	70.1617	-63.6538	-39.0495	-70.5694	73.4055	-75.9704	-85.7024	47.929	-75.4044	-59.0385	-36.0137	-63.9795	-65.5467	-71.2015	-81.463	20.3348	-77.2448	54.5673	-34.1887	33.6532	39.6925	-81.5393	-59.5103
Arctiini	Psilopleura sanguipuncta	5.39986	-17.9256	16.8162	9.68429	64.7683	-79.1269	-28.5714	57.8014	-17.1565	-23.399	5.18297	-32.3519	28.107	-84.0382	-73.8095	-62.0567	47.4368	-18.035	11.861	0	104.127	-51.296	33.3333	16.3121	-10.5002	-63.8298
Arctiini	Psychophasma erosa	-59.2727	-74.4219	45.368	70.8012	39.6675	NA	-100	45.9016	-68.2424	-80.7288	50.961	-80.178	28.7886	NA	-100	-57.6751	-87.1515	-83.5669	22.3203	-81.8991	112.114	NA	-100	-82.4143	-85.2819	-68.1073
Arctiini	Ptychotrichos elongatus	-86.0972	-75.3947	33.6198	81.8155	8.82353	342.191	0	-12.1916	-90.9814	-81.0936	48.2468	-86.4427	-14.5378	253.613	0	-16.4213	-84.2117	-74.047	20.7803	-85.6764	52.0588	310.023	0	44.5988	-86.2658	23.0769
Arctiini	Rezia cardinale	-61.1936	-64.4191	29.106	67.8944	-77.5461	-60.7077	2050.28	49.1209	-61.9829	-71.1033	41.1304	-74.855	-86.2755	-51.5762	2050.28	-61.268	-66.8772	-60.6538	17.2381	-69.7216	-42.6285	-62.0704	2050.28	-12.8396	-74.681	-28.1833
Arctiini	Rezia erythrarchos	-72.8254	-68.4211	-2.61037	72.5787	26.4911	-50.694	-72.4299	43.348	-78.7937	-75.5374	7.35444	-78.0872	3.37838	-66.4816	-77.5701	-66.696	-88.4444	-85.9155	3.62047	-86.8039	79.986	-68.737	-13.5514	-32.2467	-81.477	-70.5727
Arctiini	Rezia sanguipuncta	-73.4452	-69.2392	31.8433	74.8562	-88.5217	-97.5371	-100	97.0854	-73.5406	-80.3229	39.0641	-79.9377	-91.4712	-98.4531	-100	-98.1117	-86.5891	-71.1002	54.8512	-79.1707	-93.7811	-98.9416	-100	-98.9327	-80.1294	-98.1117
Arctiini	Rhipha flavoplagiata	-31.7579	-43.5503	0.575328	47.4737	-29.1979	NA	0	29.1979	-39.5597	-33.6095	10.5165	-41.4386	-52.3636	NA	0	-52.3636	-42.0524	-26.7456	2.72946	-38.1754	-19.4011	NA	0	-19.4011	-38.8421	-36.6203
Arctiini	Rhipha subflammans	-80.6693	-63.1549	23.6171	72.8445	-84.0821	-67.5283	-100	91.259	-81.6064	-73.4379	32.6528	-80.043	-87.6872	-72.2676	-100	-92.0417	-89.0763	-63.6873	24.819	-74.9127	-65.8902	-65.2381	-100	-87.9322	-81.6277	-90.9328
Lithosiini	Rhodographa phaeoplaga	-85.4435	-56.1738	24.1402	72.4537	71.1402	-100	-28.9855	36.4865	-88.8931	-60.7922	37.718	-69.3522	68.958	-100	-37.6812	-50	-86.7892	-66.4047	11.85	-78.1244	153.573	-100	-56.5217	-64.8649	-73.8851	-78.3784
Arctiini	Rhynchopyga meisteri	-55.1761	-62.0444	20.5366	62.7586	-88.5095	-75.2129	0	85.9874	-60.4167	-70.5488	31.008	-66.4247	-92.5477	-76.2438	0	-89.9543	-64.9055	-51.8224	28.4409	-57.1325	-79.7724	-92.6939	0	-78.7957	-59.8911	-83.5616
Arctiini	Robinsonia dewitzi	-29.2606	-44.7821	6.08245	38.0849	77.9981	9.44105	-100	-24.7626	-31.3319	-54.8883	-1.36571	-48.7214	48.8196	-7.37435	-100	19.8685	-33.5343	-38.2644	14.3905	-43.1991	110.623	2.16064	-100	60.336	-45.4298	-17.8963
Arctiini	Robinsonia spitzi	-62.2858	-64.4982	47.6874	63.5417	-2.41873	NA	-22.7545	68.8679	-61.2298	-72.4329	60.8355	-66.0677	-32.6138	NA	20.9581	-90.566	-73.9732	-76.1377	27.1727	-79.5312	51.0013	NA	132.934	89.6226	-69.8438	-93.3962
Arctiini	Romualdia opharina	-85.9026	-73.3046	9.53825	77.491	-93.5145	276.14	0	70.6884	-89.0974	-82.6337	15.9398	-85.1613	-95.0725	175.439	0	-73.4783	-98.5801	-70.2906	6.07509	-77.276	-95.7609	270.175	0	-66.4855	-90.9677	-75.7971
Arctiini	Sarosa pompilina	-52.4648	-34.0235	9.37995	51.4146	0	-56.9815	0	0	-50.2438	-47.9575	5.5409	-52.9924	0	-63.85	0	0	-74.0249	-56.0436	6.67546	-72.7965	0	-69.7695	0	0	-61.2078	0
Arctiini	Saurita attenuata	-42.132	-53.7152	-36.3454	43.0303	116.458	NA	-50	50	-74.6193	-73.9164	-43.7061	-77.1212	100.98	NA	-80	-80	79.1878	-30.1858	-32.1352	3.93939	137.383	NA	140	140	-64.8485	170
Arctiini	Saurita cassandra	-65.144	-45.0669	10.5692	54.8956	-75.8403	-72.1311	-100	81.2561	-71.2016	-42.537	19.4675	-54.3557	-81.5126	-83.8407	-100	-86.2707	-79.0467	-63.1731	6.15406	-73.9021	-61.2605	-88.0562	-100	-82.7167	-68.0706	-88.8997
Arctiini	Saurita intricata	-20.1681	-47.6889	-15.9373	41.0884	180.186	-5.12821	0	-125.981	-37.395	-58.8	-24.2801	-51.7687	170.235	-6.21707	0	121.231	6.30252	-53.2444	3.78317	-30.068	216.71	-18.2297	0	144.202	-42.7211	122.948
Arctiini	Saurita sericea	-71.7568	-60.8707	28.6406	59.6925	-75.8123	-82.3065	319.049	67.922	-73.9588	-72.7691	27.9016	-67.1631	-79.648	-87.4972	319.049	-74.1379	-81.2111	-73.4721	19.2254	-76.6995	-56.8592	-83.5252	319.049	-46.0526	-67.9798	-62.4773
Arctiini	Saurita triangulifera	-53.282	-57.0278	26.5122	57.3976	-27.8202	400	377.711	-294.545	-51.6179	-51.6605	10.8347	-53.6658	-5.72059	-33.3333	475.301	389.091	-78.3359	-75.6793	55.6246	-78.963	-69.8113	-100	566.265	372.121	-66.0172	339.394
Arctiini	Scaptius pseudoprumala	-29.7264	-20.7729	2.84327	36.9333	3.78403	396.951	-26.2605	-13.23	-37.8109	-42.029	8.12506	-51.4667	-14.2593	193.902	-44.0126	-30.5125	43.6567	156.039	-0.62734	31.6	129.949	512.805	97.479	215.971	-48.5333	-22.4076
Arctiini	Sciopsyche tropica	-78.1497	-55.1662	-38.6955	72.4156	120.288	-69.281	2.68972	-312.914	-85.5752	-65.4985	-18.8837	-81.3819	85.4197	-92.4837	5.37944	269.197	-64.6379	-60.9668	-56.8961	-78.3755	150.671	-99.6732	83.4134	469.634	-83.3861	381.588
Arctiini	Selenarctia flavidorsata	-77.7865	-57.3501	-14.6786	78.4351	67.8658	-16.6474	-99.8022	17.6409	-78.8639	-66.2085	-6.66573	-80.9876	17.1123	-7.68786	-99.8022	-36.5344	-77.8844	-53.1501	-15.9837	-75.4294	167.963	3.46821	-99.8022	49.3737	-83.1107	-13.2568
Arctiini	Sermyla transversa	-72.9965	-75.6439	-0.304745	79.7619	-40.2342	-34.9401	0	42.3935	-78.4843	-84.3267	6.86403	-85.7993	-17.5093	-46.6503	0	-43.9712	-91.4634	-92.4945	-9.98404	-95.1531	42.1501	-45.5338	0	-28.7131	-91.1565	-48.073
Arctiini	Sphecosoma melissa	-62.8326	-62.9898	14.6036	71.6339	9.78463	-76.9427	-100	66.3923	-63.3647	-67.344	21.4751	-79.7876	-23.398	-82.3885	-100	-75.8573	-64.1015	-58.2293	6.13399	-68.2599	59.984	-89.0446	-100	-58.7106	-76.8822	-75.0343
Arctiini	Suchesia erubescens	-86.1244	-69.6114	-0.704549	81.8764	194.56	10.1241	-100	-65.3179	-88.2433	-79.8725	9.4042	-87.9804	144	-2.28766	-100	33.1131	-72.864	-65.4523	-37.6627	-80.633	424.96	9.71039	-100	220.231	-87.0761	40.9579
Arctiini	Sutonocrea lobifer	-33.5505	2.89421	-43.7873	36.1923	247.485	10.9641	-45.2496	-46.2307	-66.2866	-29.2914	-31.6052	-58.9344	195.164	2.72212	-63.8486	22.0325	44.4625	9.43114	-56.9308	-32.2287	376.644	18.8658	15.5931	120.825	-48.538	50.1874
Arctiini	Sutonocrea reducta	-45.9306	-40.4209	-59.3767	62.3729	221.796	-85.2763	-100	81.7761	-51.7666	-58.3918	-54.1824	-71.2881	125.019	-90.117	-100	-90.1943	-45.142	-34.4307	-64.9892	-61.1186	412.893	-80.1533	-100	-10.3608	-67.0847	-89.4542
Arctiini	Sychesia coccina	-59.1259	-33.519	-10.0412	52.1669	-35.4358	-93.3333	168.778	-450.568	-61.769	-36.3861	-5.45058	-55.4928	-55.2466	-33.3333	187.267	268.466	-71.8626	-46.9059	-5.11143	-64.8458	-48.0791	-100	192.315	370.17	-56.5007	311.932
Arctiini	Sychesia dryas	-69.8227	-72.2715	10.9523	72.0077	-84.5863	-39.1913	0	47.964	-72.3684	-79.9846	19.2802	-79.7297	-89.2281	-28.1588	0	-43.1721	-82.9233	-68.0679	12.8232	-75.8366	-88.1433	-60.6643	0	-64.9044	-81.3063	-70.8324
Arctiini	Symphlebia abdominalis	-69.0075	-75.0712	-20.6971	80.2473	-34.175	NA	-100	48.2289	-74.4178	-84.8312	-13.0965	-87.5972	-32.9303	NA	-100	-51.2262	-84.3425	-85.3599	-17.6139	-90.6007	8.57041	NA	-100	-58.0381	-88.4099	-58.8556
Arctiini	Symphlebia catenata	-63.3572	-56.2702	-0.595094	61.0498	-93.4074	-100	-100	97.7915	-67.7584	-60.185	6.40029	-64.4199	-95.5556	-100	-100	-98.3614	-74.2272	-60.1635	2.40466	-68.4436	-92.8148	-100	-100	-98.3852	-67.8513	-98.5277
Arctiini	Symphlebia indistincta	-52.0037	-49.8688	2.2845	49.8688	5.77566	-34.4828	0	-5.91321	-55.5497	-62.7734	8.01097	-62.7734	-33.0788	6.89655	0	-32.8565	-58.397	-30.7962	3.23891	-30.7962	98.6635	24.1379	0	98.5694	-7.65529	7.20076
Arctiini	Symphlebia lophocampoides	-75.7328	-50.7383	23.8444	61.3355	-80.4294	-90.3409	0	82.0735	-78.7284	-57.4651	33.6263	-66.3284	-85.8896	-93.1818	0	-85.5675	-87.8233	-56.1321	29.7852	-71.7069	-68.1595	-94.9811	0	-70.6782	-72.0114	-78.9221
Arctiini	Symphlebia neja	-66.0412	-33.5463	8.72825	42.374	180.261	-51.1697	-99.9336	71.125	-71.2738	-37.0044	19.4653	-49.4253	174.853	-48.0647	-100	-81.6789	-74.2865	-43.7445	-0.268779	-59.328	180.162	-63.1221	-99.9336	-40.7175	-58.0018	-70.0801
Arctiini	Symphlebia perflua	-36.2273	-58.3122	8.2574	54.9145	-62.6712	-37.1861	-100	53.816	-35.9129	-71.2799	27.0881	-57.4519	-79.1096	-56.3571	-100	-73.5812	-53.9782	-62.5316	-31.549	-69.391	-18.6301	-37.1463	-100	-15.4599	-61.9658	-65.6556
Arctiini	Symphlebia suanus	-66.3041	-54.5143	30.8998	53.2678	-36.1514	-56.937	-100	86.3071	-64.3662	-57.1619	30.1028	-56.7814	-54.768	-50.1315	-100	-73.7667	-80.522	-72.6286	30.715	-71.9461	-47.7654	-77.502	-100	-93.4993	-68.7784	-88.1512
Lithosiini	Talara barema	-75.6787	-58.0499	86.1533	67.3511	-33.3224	NA	23.9161	60.0561	-74.7974	-63.7088	84.3666	-70.6552	2.58592	NA	14.8188	-61.5978	-89.3817	-81.4559	98.7851	-82.4155	-56.8249	NA	82.9424	-51.1563	-75.3033	-64.6111
Lithosiini	Talara ditis	-37.0082	-53.3221	-4.30761	51.6918	32.1616	-50.7267	0	-24.1658	-47.667	-59.3289	2.77484	-56.4489	7.14449	-72.9651	0	-1.36788	-32.6167	-55.7383	25.0264	-51.4908	74.4579	-89.5349	0	58.4663	-55.4439	30.5285
Lithosiini	Talara niveata	-29.5352	-39.5357	15.8808	30.8485	170.022	-45.3366	0	-44.2584	-32.5014	-51.8115	15.6796	-36.4242	175.813	-50.352	0	46.7254	-48.743	-51.9522	22.0043	-50.6061	194.302	-65.0462	0	51.1747	-50	47.7093
Arctiini	Tessella sertata	-58.7479	-50.2374	17.0448	57.333	-62.508	-41.8391	-100	39.4366	-61.0349	-57.5261	25.4739	-63.1994	-74.2521	-47.8161	-100	-41.9718	-72.0983	-59.7578	11.4446	-69.0412	-45.226	-57.0115	-100	-47.6056	-70.668	-44.507
Arctiini	Thysanoprymna pyrrhopyga	-56.9406	-44.0893	-4.89501	55.8003	-64.1488	-55.6017	-100	77.0686	-56.9174	-48.7062	0.514532	-57.1127	-77.7903	-69.5539	-100	-89.8345	-70.4503	-51.6489	5.18704	-66.7213	-4.90417	-70.5135	-100	-34.3972	-64.2372	-86.9976
Arctiini	Timalus clavipennis	-49.4677	-45.4594	-17.1794	52.6235	-13.7972	-61.669	30.5662	-0.322407	-56.9198	-64.5299	-11.2024	-66.6327	-20.8445	-69.967	32.0058	-3.17034	-41.093	-47.9701	-29.2156	-55.9857	83.6753	-78.4064	150.096	140.838	-64.4422	-9.83342
Arctiini	Tipulodes ima	-57.6493	-53.6262	25.6037	55.1571	-71.2738	-67.0568	-100	75.6867	-63.2201	-56.3178	35.8332	-58.0875	-82.5177	-71.2898	-100	-83.8759	-66.9973	-57.8505	26.4887	-62.5988	-37.5047	-75.0996	-100	-42.0142	-61.1914	-82.1974
Lithosiini	Trichomelia celenna	-63.3645	-34.5622	96.3893	51.3351	-95.6922	NA	72.4292	98.4857	-75.4019	-43.1967	91.3468	-55.6991	-96.8214	NA	70.1369	-99.2429	-71.215	-58.3798	120.502	-64.5708	-89.0841	NA	121.585	-99.5341	-59.7761	-100
Arctiini	Trichura cerberus	-79.7673	-45.8548	2.50605	67.4055	7.59189	-69.5577	-100	75.4772	-85.129	-65.6486	-2.72587	-79.6875	8.5961	-80.5417	-100	-80.9104	-89.6308	-70.2896	18.4216	-84.5567	23.6995	-76.6402	-100	-81.8649	-85.1017	-90.0147
Arctiini	Trichura dixanthia	-46.0245	-10.6061	2.55078	36.1511	8.00636	-59.1967	0	12.0844	-48.6239	-28.2828	4.21587	-42.8058	-0.980912	-76.0383	0	-23.6313	-69.7248	-81.0606	13.9584	-62.9496	73.5949	-79.9635	0	32.7494	-52.518	-28.7279
Arctiini	Tricypha nigrescens	-35.1478	-32.0299	-8.51216	36.6018	-3.60434	-86.5772	4.08696	-20.6161	-35.7606	-32.812	-13.0615	-41.6283	-8.90388	-95.9732	-10.5217	-17.5355	-49.7116	-39.0003	7.02432	-46.9381	-14.3515	-100	165.913	8.76777	-43.1858	-9.24171
Arctiini	Utetheisa pulchella	-58.6231	-63.0989	31.1046	59.7524	45.3241	-77.1361	-97.8954	81.7963	-64.8051	-73.1798	33.4866	-69.686	42.762	-80.7841	-96.0459	-83.4411	-67.4745	-68.9172	12.9266	-74.2452	112.324	-77.9536	-89.9235	-60.1368	-69.5048	-84.4391
Arctiini	Virbia divisa	-70.5668	-47.0228	24.9116	60.4691	-87.4191	-70	-100	81.6667	-72.0258	-51.0708	32.2313	-65.5509	-89.8551	-74.3478	-100	-88.6111	-86.532	-58.4843	28.2177	-74.7862	-85.0755	-100	-100	-91.5278	-72.343	-90.8333
Arctiini	Viviennea ardesiaca	-60.8696	-53.258	2.63299	58.7978	5.11238	-45.6192	-76.1194	0.508906	-69.7454	-67.3617	7.33169	-69.8987	-31.4235	-46.5513	-90.7463	-22.9008	-65.2624	-40.3997	0.920475	-56.5868	96.2539	-65.6991	-9.25373	143.003	-64.5325	1.27226
Arctiini	Viviennea dolens	-78.6438	-51.6059	30.7187	62.7395	-48.9627	436.198	-100	-72.3711	-83.2845	-57.6749	42.6416	-70.1794	-74.6369	392.535	-100	-15.2577	-81.7301	-51.9015	39.504	-60.4158	-13.7967	359.722	-100	155.258	-65.4505	42.0619
Arctiini	Viviennea flavicincta	-67.7677	-57.2056	8.95765	63.209	-62.5322	-100	460.714	36.0278	-68.3087	-65.3944	17.1145	-68.0889	-75.1611	-100	460.714	-57.0664	-81.0934	-68.5635	-4.01737	-74.8339	-38.8209	-100	460.714	-15.1499	-73.5054	-34.7966
Arctiini	Viviennea moma	-24.3207	-40.8006	-54.7931	54.6816	-66.9594	NA	519.514	-47.1449	-28.6628	-55.8891	-49.7351	-60.7606	-70.3471	NA	519.514	19.9122	-42.8876	-47.1901	-42.3058	-64.7364	-38.9377	NA	519.514	162.665	-58.9455	56.6618
Arctiini	Viviennea salma	-40.8121	-40.2821	24.1165	47.3024	-18.3964	-63.8848	-100	100	-50.3904	-61.5897	35.6145	-64.6801	-42.8206	-70.0148	-100	-100	-55.6481	-51.7949	21.7376	-58.9084	49.2181	-60.5982	-100	-100	-67.2836	-100
Arctiini	Viviennea zonana	-70.327	-75.4877	-1.1378	75.4877	-91.1549	-63.6364	75	98.2759	-72.2792	-79.1396	-1.87526	-79.1396	-93.5645	-78.6834	-75	-100	-84.9683	-70.8854	5.40455	-70.8854	-95.2101	-82.1317	-100	-100	-80.4902	-100
Arctiini	Xanthophaenia levis	-65.8259	-70.222	20.0764	71.693	-67.1461	-80.4934	-92.9967	84.8527	-68.7822	-78.1523	29.3781	-76.3379	-74.1484	-86.4474	-94.7883	-88.8199	-69.9213	-55.4322	10.3792	-64.5574	-17.2597	-78.0761	-77.4081	-58.0044	-75.8667	-81.5668
Lithosiini	Xantholopha purpurascens	-77.8562	-75.9436	58.482	73.693	-94.7197	-100	380.723	82.2581	-79.9422	-86.686	54.7681	-80.1865	-93.8722	-68.75	475.301	-45.1613	-91.5918	-84.9025	56.3088	-83.4499	-92.1121	-100	566.867	-100	-85.4812	-75.8065
Lithosiini	Zonoda dives	-48.5622	-44.9018	5.52164	50.7206	-70.9479	NA	-83.0759	70.9132	-47.1244	-37.387	12.278	-49.5927	-79.7397	NA	-90.1162	-81.0026	-61.215	-52.9155	8.37958	-63.1266	-45.776	NA	-70.7314	-38.7292	-59.8997	-75.9898
Lithosiini	Zonoda endoxantha	-62.3824	-69.258	2.6638	65.8504	-81.4521	-84.5209	0	80.3295	-64.4425	-74.8233	7.40195	-70.3028	-86.571	-84.7666	0	-85.6591	-82.2212	-81.2279	9.4423	-79.5191	-86.2712	-99.6724	0	-86.8796	-72.707	-84.3165
Lithosiini	Zonoda fasciata	-78.1516	-72.2711	6.97328	78.6199	-85.1122	NA	-100	94.2008	-81.4418	-80.1056	15.6743	-82.9186	-90.2107	NA	-100	-96.345	-92.1627	-72.8433	11.9453	-81.6742	-86.9816	NA	-100	-99.7563	-84.8039	-96.8811
